# Supplementary material for: French validation of the Barcelona Music Reward Questionnaire
Source: PeerJ. 2016 Mar 21;4:e1760. doi: 10.7717/peerj.1760 (PMC4806630; doi:10.7717/peerj.1760)
Supplement: Supplemental Information 1 [file peerj-04-1760-s001.xls]

## Sheet: Version franÃ§aise internationa
id	Completed	Last page seen	Start language	Token	Date last action	Date started	Je consens à p... []	Âge: []	Sexe: []	Plus haut nivea... []	Première langu... []	Première langu... [other]	Région dans la... []	Région dans la... [other]	Avez-vous compl... []	Pendant combien... []	Êtes-vous un m... []	Si vous jouez d... []	Combien d'heure... []	Chaque item de ... [SQ001]	Chaque item de ... [SQ002]	Chaque item de ... [SQ003]	Chaque item de ... [SQ004]	Chaque item de ... [SQ005]	Chaque item de ... [SQ006]	Chaque item de ... [SQ007]	Chaque item de ... [SQ008]	Chaque item de ... [SQ009]	Chaque item de ... [SQ010]	Chaque item de ... [SQ011]	Chaque item de ... [SQ012]	Chaque item de ... [SQ013]	Chaque item de ... [SQ014]	Chaque item de ... [SQ015]	Chaque item de ... [SQ016]	Chaque item de ... [SQ017]	Chaque item de ... [SQ018]	Chaque item de ... [SQ019]	Chaque item de ... [SQ020]	Chaque item de ... [SQ021]	Chaque item de ... [SQ022]
90	2014-11-26 10:59:52	3	en		2014-11-26 10:59:52	2014-11-26 10:57:40	A1	26	d1	d1	d1		A1		N	0	N	0	1	A4	A4	A3	A2	A1	A5	A3	A4	A4	A4	A3	A4	A4	A4	A4	A3	A2	A4	A3	A4	A1	A1
92	2014-12-12 17:58:21	3	fr		2014-12-12 17:58:21	2014-12-12 17:56:36	A1	33	d1	d1	d1		A2		N	0	N	0	4	A5	A2	A5	A5	A1	A5	A4	A5	A4	A4	A4	A5	A3	A4	A3	A4	A4	A5	A5	A5	A2	A2
93	2014-12-12 18:16:27	3	fr		2014-12-12 18:16:27	2014-12-12 18:05:26	A1	29	d1	d2	d1		A2		N	2	N	0	8	A3	A2	A4	A3	A1	A4	A5	A5	A5	A4	A4	A2	A1	A5	A4	A4	A2	A3	A3	A4	A2	A2
94	2014-12-12 18:31:20	3	fr		2014-12-12 18:31:20	2014-12-12 18:27:29	A1	34	d1	d2	d1		A2		N	0	N	0	12	A4	A1	A5	A2	A1	A4	A4	A5	A4	A4	A5	A3	A3	A4	A2	A4	A5	A5	A5	A5	A4	A4
97	2014-12-12 23:56:09	3	fr		2014-12-12 23:56:09	2014-12-12 23:51:04	A1	33	d2	d1	d1		A2		N	0	N	0	3	A4	A2	A4	A4	A2	A3	A4	A4	A4	A3	A2	A4	A2	A4	A4	A4	A2	A4	A4	A3	A2	A3
98	2014-12-13 04:50:36	3	fr		2014-12-13 04:50:36	2014-12-13 04:47:54	A1	30	d2	d1	d1		A2		Y	8	N	8	8	A5	A2	A5	A4	A4	A5	A4	A5	A4	A2	A4	A4	A4	A4	A5	A5	A4	A4	A4	A3	A1	A1
99	2014-12-13 06:09:29	3	fr		2014-12-13 06:09:29	2014-12-13 06:04:59	A1	33	d2	d1	d1		A2		N	13	N	0	14	A5	A1	A4	A4	A1	A4	A3	A4	A5	A4	A3	A2	A3	A4	A3	A3	A2	A3	A4	A4	A1	A1
100	2014-12-13 08:46:10	3	fr		2014-12-13 08:46:10	2014-12-13 08:42:59	A1	29	d1	d1	d1		A2		N	3	N	0	20	A5	A1	A4	A4	A2	A5	A4	A3	A4	A4	A4	A2	A4	A4	A5	A4	A4	A3	A4	A5	A2	A2
101	2014-12-13 13:11:25	3	fr		2014-12-13 13:11:25	2014-12-13 13:08:33	A1	37	d2	d1	d1		A2		N	0	N	0	3	A4	A4	A4	A3	A1	A4	A4	A5	A5	A5	A2	A4	A4	A4	A5	A4	A2	A4	A4	A3	A1	A2
102	2014-12-15 03:08:38	3	fr		2014-12-15 03:08:38	2014-12-15 03:04:52	A1	34	d1	d1	d1		A2		N	2	N	0	7	A5	A2	A4	A2	A1	A5	A4	A5	A4	A5	A3	A4	A3	A3	A5	A4	A3	A4	A3	A5	A1	A1
103	2014-12-15 10:23:35	3	fr		2014-12-15 10:23:35	2014-12-15 10:18:48	A1	34	d1	d1	d1		A2		Y	10	N	0	4	A4	A2	A5	A4	A5	A4	A4	A5	A5	A2	A3	A2	A4	A5	A4	A4	A3	A4	A4	A4	A2	A2
104	2014-12-15 15:50:31	3	fr		2014-12-15 15:50:31	2014-12-15 15:45:26	A1	33	d1	d1	d1		A2		N	0	N	0	1	A5	A4	A5	A3	A1	A4	A4	A5	A5	A4	A3	A5	A4	A4	A4	A3	A3	A5	A3	A5	A1	A2
105	2014-12-16 01:27:20	3	fr		2014-12-16 01:27:20	2014-12-16 01:24:20	A1	33	d1	d1	d1		A2		Y	10	N	3	5	A4	A5	A4	A4	A3	A5	A5	A4	A4	A2	A3	A2	A4	A4	A5	A4	A2	A2	A4	A5	A1	A1
106	2014-12-16 02:21:37	3	fr		2014-12-16 02:21:37	2014-12-16 02:11:38	A1	33	d1	d2	d1		A2		Y	10	N	6	10	A3	A2	A4	A3	A1	A4	A4	A4	A4	A4	A4	A4	A5	A4	A4	A4	A4	A4	A4	A5	A1	A1
107	2014-12-16 03:19:51	3	fr		2014-12-16 03:19:51	2014-12-16 03:14:33	A1	33	d2	d1	d1		A2		N	0	N	0	4	A5	A2	A5	A5	A1	A5	A2	A5	A5	A5	A2	A5	A1	A5	A5	A4	A1	A5	A5	A5	A1	A1
108	2014-12-16 04:41:57	3	fr		2014-12-16 04:41:57	2014-12-16 04:36:53	A1	33	d1	d2	d1		A2		Y	7	N	2	7	A4	A4	A5	A5	A1	A5	A4	A5	A4	A4	A3	A5	A5	A5	A4	A4	A4	A4	A4	A3	A2	A1
109	2014-12-16 06:57:30	3	fr		2014-12-16 06:57:30	2014-12-16 06:51:53	A1	36	d1	d2	d1		A2		N	0	N	7	7	A3	A1	A5	A5	A5	A4	A5	A4	A4	A2	A3	A1	A5	A4	A3	A3	A5	A5	A3	A5	A1	A1
110	2014-12-16 08:17:36	3	fr		2014-12-16 08:17:36	2014-12-16 08:11:23	A1	33	d1	d1	d1		A2		N	0	N	0	8	A4	A2	A4	A4	A5	A2	A4	A4	A4	A1	A3	A4	A1	A4	A3	A3	A4	A4	A3	A4	A3	A2
112	2014-12-16 15:55:29	3	fr		2014-12-16 15:55:29	2014-12-16 15:49:12	A1	42	d1	d1	d1		A2		Y	3	N	2	20	A5	A1	A5	A5	A1	A5	A5	A5	A5	A4	A5	A4	A5	A4	A5	A4	A4	A4	A4	A5	A2	A2
113	2014-12-16 16:07:53	3	fr		2014-12-16 16:07:53	2014-12-16 16:04:49	A1	43	d1	d1	d1		A2		N	0	N	1	1	A5	A2	A5	A5	A1	A4	A3	A5	A5	A4	A2	A5	A4	A5	A5	A5	A2	A5	A5	A4	A2	A2
115	2014-12-17 06:27:51	3	fr		2014-12-17 06:27:51	2014-12-17 06:22:51	A1	37	d2	d1	d1		A2		N	0	N	0	3	A3	A2	A5	A2	A2	A3	A4	A5	A4	A4	A3	A4	A3	A5	A5	A3	A2	A5	A4	A4	A1	A2
117	2014-12-18 17:17:24	3	fr		2014-12-18 17:17:24	2014-12-18 17:13:43	A1	34	d1	d1	d1		A2		N	0	N	0	35	A4	A1	A5	A5	A2	A4	A5	A4	A3	A4	A4	A5	A4	A4	A3	A4	A4	A3	A4	A4	A3	A1
118	2014-12-22 08:20:15	3	fr		2014-12-22 08:20:15	2014-12-22 08:16:09	A1	34	d1	d1	d1		A2		N	0	N	0	21	A3	A2	A4	A4	A2	A4	A4	A5	A4	A4	A4	A2	A2	A5	A4	A4	A4	A4	A5	A4	A3	A2
122	2015-01-07 08:09:37	3	fr		2015-01-07 08:09:37	2015-01-07 08:06:39	A1	32	d2	d1	d1		A2		N	0	N	0	5	A4	A2	A5	A4	A1	A3	A3	A5	A4	A4	A3	A4	A3	A4	A4	A4	A3	A4	A3	A3	A2	A2
124	2015-01-14 16:07:25	3	fr		2015-01-14 16:07:25	2015-01-14 16:02:31	A1	38	d1	d2	d1		A2		N	0	N	0	5	A5	A1	A5	A5	A2	A4	A2	A5	A5	A2	A4	A2	A4	A4	A4	A4	A2	A3	A4	A4	A2	A2
125	2015-01-14 17:50:59	3	fr		2015-01-14 17:50:59	2015-01-14 17:46:51	A1	37	d1	d1	d1		A2		N	0	N	0	12	A4	A1	A5	A4	A3	A5	A4	A5	A4	A1	A5	A5	A3	A5	A4	A5	A4	A5	A4	A4	A2	A3
127	2015-01-16 02:38:47	3	fr		2015-01-16 02:38:47	2015-01-16 02:34:52	A1	35	d1	d1	d1		A3		N	0	N	0	8	A4	A2	A5	A4	A1	A5	A4	A5	A5	A4	A4	A5	A3	A4	A4	A4	A1	A5	A4	A4	A3	A3
128	2015-01-18 11:59:17	3	fr		2015-01-18 11:59:17	2015-01-18 11:55:55	A1	36	d1	d1	d1		A3		N	0	N	0	15	A3	A1	A4	A5	A3	A4	A4	A4	A4	A2	A3	A2	A2	A3	A2	A4	A2	A2	A4	A4	A1	A1
130	2015-01-18 14:21:12	3	fr		2015-01-18 14:21:12	2015-01-18 14:18:09	A1	25	d1	d1	d1		A1		N	0	N	0	20	A4	A2	A3	A4	A5	A3	A3	A1	A2	A1	A5	A1	A1	A4	A3	A1	A1	A4	A4	A3	A4	A4
131	2015-01-18 14:42:17	3	fr		2015-01-18 14:42:17	2015-01-18 14:39:31	A1	25	d2	d1	d1		A1		Y	12	N	4	1	A4	A4	A4	A5	A1	A3	A2	A5	A4	A5	A2	A4	A4	A5	A5	A5	A2	A5	A5	A5	A1	A1
132	2015-01-18 15:07:46	3	fr		2015-01-18 15:07:46	2015-01-18 15:05:40	A1	24	d2	d1	d1		A1		N	8	N	0	5	A5	A1	A4	A4	A1	A4	A4	A4	A4	A5	A4	A3	A5	A5	A5	A3	A1	A3	A4	A5	A1	A1
133	2015-01-18 15:41:55	3	fr		2015-01-18 15:41:55	2015-01-18 15:37:48	A1	24	d2	d1	d1		A1		N	0	N	0	10	A5	A2	A5	A4	A1	A5	A5	A5	A5	A5	A5	A4	A4	A4	A5	A4	A5	A5	A4	A5	A2	A1
135	2015-01-19 11:34:58	3	fr		2015-01-19 11:34:58	2015-01-19 11:32:10	A1	30	d2	d1	d1		A2		Y	10	N	9	9	A5	A1	A4	A4	A2	A4	A4	A5	A4	A3	A4	A4	A4	A4	A4	A4	A4	A4	A4	A5	A1	A1
136	2015-01-19 12:38:55	3	fr		2015-01-19 12:38:55	2015-01-19 11:54:42	A1	20	d2	d2	d1		A1		Y	12	N	5	6	A4	A2	A4	A4	A3	A3	A4	A5	A3	A3	A4	A5	A4	A4	A5	A4	A3	A4	A4	A5	A1	A1
137	2015-01-19 12:54:00	3	fr		2015-01-19 12:54:00	2015-01-19 12:51:18	A1	29	d1	d1	d1		A1		N	0	N	0	4	A4	A3	A4	A4	A1	A4	A4	A4	A4	A4	A3	A4	A4	A4	A4	A4	A3	A4	A4	A4	A1	A1
138	2015-01-19 14:00:22	3	fr		2015-01-19 14:00:22	2015-01-19 13:55:27	A1	25	d2	d1	d1		A1		N	0	N	0	5	A4	A4	A4	A3	A1	A2	A3	A5	A4	A4	A2	A5	A4	A3	A4	A3	A2	A5	A4	A4	A3	A2
139	2015-01-19 16:47:16	3	fr		2015-01-19 16:47:16	2015-01-19 16:42:58	A1	28	d2	d1	d1		A1		N	0	N	0	2	A4	A4	A4	A3	A2	A4	A4	A4	A4	A4	A2	A4	A4	A3	A5	A4	A1	A4	A4	A5	A2	A1
141	2015-01-19 18:14:46	3	fr		2015-01-19 18:14:46	2015-01-19 18:11:46	A1	22	d2	d1	d1		A1		Y	10	N	2	5	A3	A2	A5	A3	A1	A3	A3	A4	A5	A4	A4	A4	A4	A5	A5	A5	A1	A5	A4	A5	A1	A1
142	2015-01-19 18:21:24	3	fr		2015-01-19 18:21:24	2015-01-19 18:17:59	A1	22	d2	d1	d1		A1		Y	15	N	7	2	A1	A2	A5	A2	A4	A5	A3	A5	A5	A2	A1	A3	A2	A4	A4	A1	A1	A5	A4	A5	A1	A1
144	2015-01-19 20:40:44	3	fr		2015-01-19 20:40:44	2015-01-19 20:33:44	A1	20	d2	d1	d1		A1		N	0	N	0	5	A4	A1	A5	A5	A2	A4	A2	A5	A5	A4	A4	A4	A2	A5	A5	A2	A2	A4	A5	A4	A3	A3
146	2015-01-20 06:19:15	3	fr		2015-01-20 06:19:15	2015-01-20 06:09:57	A1	25	d2	d1	d2		A1		N	1	N	0	7	A5	A2	A4	A5	A2	A4	A4	A4	A5	A2	A4	A1	A2	A5	A4	A4	A1	A4	A5	A4	A2	A5
147	2015-01-20 07:57:40	3	fr		2015-01-20 07:57:40	2015-01-20 07:52:58	A1	33	d1	d1	d1		A2		Y	3	N	3	5	A4	A3	A4	A5	A2	A5	A4	A4	A4	A4	A5	A1	A5	A5	A4	A4	A3	A4	A4	A4	A4	A1
148	2015-01-20 10:07:52	3	fr		2015-01-20 10:07:52	2015-01-20 10:05:28	A1	26	d1	d1	d1		A1		N	15	N	15	15	A4	A1	A4	A4	A2	A4	A5	A5	A5	A3	A4	A4	A3	A4	A4	A3	A4	A5	A5	A4	A1	A1
149	2015-01-20 10:24:13	3	fr		2015-01-20 10:24:13	2015-01-20 10:20:28	A1	27	d1	d1	d1		A1		N	0	Y	3	20	A4	A1	A5	A5	A1	A5	A5	A5	A5	A5	A4	A4	A5	A4	A4	A4	A4	A4	A5	A5	A1	A1
150	2015-01-20 11:25:07	3	fr		2015-01-20 11:25:07	2015-01-20 11:16:17	A1	24	d1	d1	d1		A2		Y	11	Y	4	25	A4	A1	A5	A5	A1	A4	A5	A5	A5	A5	A4	A3	A5	A5	A5	A3	A5	A5	A5	A5	A1	A1
151	2015-01-20 13:48:35	3	fr		2015-01-20 13:48:35	2015-01-20 13:43:59	A1	21	d2	d1		Bulgare	A1		Y	16	Y	6	20	A4	A2	A4	A5	A1	A4	A2	A4	A4	A4	A3	A4	A4	A5	A5	A3	A3	A4	A4	A4	A1	A1
152	2015-01-20 19:54:49	3	fr		2015-01-20 19:54:49	2015-01-20 19:41:35	A1	24	d2	d1	d2		A1		N	0	N	0	14	A5	A1	A5	A4	A1	A5	A5	A5	A5	A4	A5	A2	A4	A4	A5	A4	A4	A4	A5	A5	A2	A2
153	2015-01-21 10:23:05	3	fr		2015-01-21 10:23:05	2015-01-21 10:18:39	A1	25	d1	d1	d1		A1		Y	6	Y	10	30	A4	A1	A5	A5	A4	A3	A5	A5	A5	A2	A4	A2	A4	A5	A4	A3	A2	A5	A5	A4	A2	A2
154	2015-01-21 13:21:18	3	fr		2015-01-21 13:21:18	2015-01-21 13:18:12	A1	23	d1	d1	d1		A1		N	0	N	10	35	A5	A1	A5	A4	A2	A5	A5	A5	A5	A4	A5	A4	A5	A4	A4	A5	A4	A5	A5	A5	A1	A1
155	2015-01-22 16:22:05	3	fr		2015-01-22 16:22:05	2015-01-22 16:12:16	A1	37	d1	d1	d1		A2		N	0	N	3	50	A4	A1	A5	A5	A3	A4	A5	A5	A5	A4	A5	A4	A4	A5	A5	A5	A4	A5	A5	A5	A1	A1
157	2015-01-24 15:06:46	3	fr		2015-01-24 15:06:46	2015-01-24 15:04:13	A1	25	d2	d1	d1		A1		N	0	N	0	3	A4	A2	A4	A4	A2	A4	A4	A4	A4	A4	A4	A4	A4	A4	A4	A4	A3	A4	A4	A4	A2	A2
158	2015-01-24 15:07:20	3	fr		2015-01-24 15:07:20	2015-01-24 15:04:29	A1	29	d2	d1	d1		A1		N	0	N	0	3	A3	A2	A3	A4	A1	A3	A2	A3	A4	A4	A1	A1	A1	A3	A4	A3	A1	A3	A4	A4	A2	A2
161	2015-01-24 19:26:42	3	fr		2015-01-24 19:26:42	2015-01-24 19:18:27	A1	30	d2	d1	d11		A1		Y	4	N	0	10	A3	A1	A5	A5	A1	A3	A2	A5	A5	A5	A3	A3	A2	A5	A3	A3	A1	A2	A5	A5	A1	A1
162	2015-01-25 10:55:37	3	fr		2015-01-25 10:55:37	2015-01-25 10:52:06	A1	30	d1	d1	d2		A1		N	0	N	0	1	A4	A4	A4	A4	A2	A4	A4	A4	A4	A4	A3	A3	A3	A3	A3	A3	A2	A4	A4	A4	A2	A2
163	2015-01-27 11:48:08	3	fr		2015-01-27 11:48:08	2015-01-27 11:38:25	A1	30	d2	d1	d2		A1		Y	6	N	2	20	A4	A1	A5	A5	A1	A4	A5	A4	A5	A5	A4	A5	A4	A5	A5	A4	A4	A4	A5	A5	A1	A1
165	2015-01-27 22:15:48	3	fr		2015-01-27 22:15:48	2015-01-27 22:11:15	A1	27	d2	d1	d2		A2		N	0	N	2	10	A4	A2	A5	A5	A2	A4	A4	A5	A5	A4	A3	A3	A4	A5	A5	A4	A3	A5	A5	A5	A2	A1
166	2015-01-27 22:15:46	3	fr		2015-01-27 22:15:46	2015-01-27 22:11:38	A1	26	d2	d1	d1		A1		N	0	N	0	1	A3	A2	A4	A3	A1	A1	A4	A4	A4	A4	A4	A2	A1	A4	A1	A3	A1	A3	A3	A4	A1	A1
167	2015-01-27 22:18:22	3	fr		2015-01-27 22:18:22	2015-01-27 22:12:06	A1	27	d2	d1	d10		A1		N	0	N	0	0	A5	A1	A5	A5	A1	A4	A5	A5	A5	A5	A5	A4	A5	A5	A5	A4	A1	A5	A5	A5	A1	A5
168	2015-01-27 22:15:38	3	fr		2015-01-27 22:15:38	2015-01-27 22:12:38	A1	25	d2	d1	d1		A1		N	0	N	0	10	A4	A2	A3	A5	A1	A4	A4	A5	A5	A4	A3	A2	A3	A4	A5	A4	A1	A4	A4	A5	A3	A2
169	2015-01-27 22:32:20	3	fr		2015-01-27 22:32:20	2015-01-27 22:26:28	A1	23	d2	d1	d2		A1		N	10	N	0	30	A4	A1	A5	A5	A2	A4	A4	A5	A5	A4	A5	A4	A4	A5	A4	A4	A4	A4	A5	A4	A2	A1
170	2015-01-27 22:49:39	3	fr		2015-01-27 22:49:39	2015-01-27 22:35:09	A1	28	d1	d1		Albanais	A1		Y	6	N	2	6	A4	A1	A5	A5	A2	A4	A5	A5	A5	A4	A4	A5	A3	A5	A5	A3	A3	A5	A5	A5	A1	A1
171	2015-01-27 22:40:17	3	fr		2015-01-27 22:40:17	2015-01-27 22:36:38	A1	22	d2	d1	d6			Égypte	N	0	N	0	3	A4	A4	A4	A2	A2	A4	A4	A3	A4	A4	A4	A2	A1	A4	A4	A1	A4	A2	A4	A4	A2	A1
172	2015-01-27 22:41:56	3	fr		2015-01-27 22:41:56	2015-01-27 22:37:13	A1	25	d1	d1	d1		A1		N	0	N	0	30	A4	A1	A5	A4	A1	A5	A5	A5	A5	A5	A5	A3	A3	A5	A5	A5	A5	A5	A5	A5	A1	A2
173	2015-01-27 22:42:39	3	fr		2015-01-27 22:42:39	2015-01-27 22:40:03	A1	23	d2	d1		roumain	A1		Y	10	N	0	10	A5	A2	A3	A4	A1	A4	A3	A4	A5	A5	A4	A3	A2	A4	A5	A4	A3	A4	A4	A4	A1	A1
174	2015-01-27 23:03:49	3	fr		2015-01-27 23:03:49	2015-01-27 23:01:16	A1	26	d2	d1	d1		A1		Y	9	N	0	10	A4	A2	A5	A4	A2	A3	A3	A3	A4	A4	A4	A3	A5	A4	A5	A4	A1	A4	A3	A4	A2	A1
175	2015-01-27 23:17:15	3	fr		2015-01-27 23:17:15	2015-01-27 23:13:08	A1	25	d1	d1	d1		A1		N	0	N	0	10	A4	A3	A4	A4	A4	A3	A4	A4	A4	A2	A3	A1	A2	A4	A3	A5	A3	A5	A4	A4	A2	A5
177	2015-01-28 00:15:10	3	fr		2015-01-28 00:15:10	2015-01-28 00:07:51	A1	54	d2	d1	d4		A1		N	0	N	0	5	A3	A2	A3	A4	A1	A4	A4	A4	A4	A4	A4	A4	A4	A4	A4	A4	A2	A4	A4	A4	A2	A1
178	2015-01-28 00:31:50	3	fr		2015-01-28 00:31:50	2015-01-28 00:27:36	A1	26	d1	d1	d6		A1		N	0	N	0	20	A4	A4	A4	A4	A3	A3	A3	A3	A3	A2	A4	A1	A2	A3	A3	A2	A2	A3	A3	A3	A2	A3
179	2015-01-28 00:34:21	3	fr		2015-01-28 00:34:21	2015-01-28 00:27:37	A1	24	d2	d2		Roumain	A1		N	1	N	0	5	A4	A2	A4	A5	A1	A4	A4	A4	A5	A5	A2	A1	A1	A5	A5	A3	A1	A2	A4	A5	A2	A2
180	2015-01-28 00:49:49	3	fr		2015-01-28 00:49:49	2015-01-28 00:43:45	A1	27	d2	d1	d3		A1		N	0	N	0	3	A4	A1	A4	A4	A2	A4	A3	A4	A4	A4	A3	A4	A4	A4	A3	A4	A2	A4	A4	A4	A2	A2
182	2015-01-28 13:22:39	3	fr		2015-01-28 13:22:39	2015-01-28 13:19:48	A1	24	d2	d1	d1		A1		N	0	N	0	5	A5	A2	A4	A4	A1	A4	A4	A4	A4	A5	A4	A3	A5	A5	A4	A5	A3	A4	A4	A4	A2	A2
183	2015-01-28 23:45:52	3	fr		2015-01-28 23:45:52	2015-01-28 23:43:20	A1	25	d1	d1	d10		A1		N	0	N	0	10	A4	A1	A5	A5	A3	A4	A5	A5	A5	A3	A5	A4	A3	A4	A5	A4	A4	A4	A4	A5	A2	A2
184	2015-01-29 01:11:26	3	fr		2015-01-29 01:11:26	2015-01-29 01:06:21	A1	25	d2	d1	d1		A1		N	0	N	0	80	A5	A1	A4	A5	A1	A4	A5	A5	A4	A5	A4	A5	A5	A4	A5	A5	A3	A5	A5	A4	A1	A2
185	2015-01-29 15:10:36	3	fr		2015-01-29 15:10:36	2015-01-29 15:05:39	A1	40	d2	d1	d1		A1		Y	6	N	0	25	A4	A1	A5	A5	A1	A4	A4	A5	A5	A5	A4	A4	A2	A5	A3	A4	A3	A5	A4	A5	A1	A1
186	2015-01-29 15:21:58	3	fr		2015-01-29 15:21:58	2015-01-29 15:17:57	A1	22	d1	d1	d1		A1		N	0	N	8	15	A5	A2	A4	A3	A4	A4	A5	A5	A4	A3	A4	A2	A5	A5	A4	A4	A4	A4	A5	A4	A1	A1
188	2015-01-29 16:43:53	3	fr		2015-01-29 16:43:53	2015-01-29 16:38:40	A1	26	d2	d1	d1		A1		N	0	N	0	20	A4	A1	A5	A5	A1	A4	A4	A5	A5	A5	A4	A4	A3	A5	A5	A5	A2	A5	A5	A5	A1	A3
190	2015-01-29 21:16:02	3	fr		2015-01-29 21:16:02	2015-01-29 21:13:20	A1	22	d2	d1	d1		A1		N	0	N	0	6	A2	A4	A4	A2	A2	A2	A1	A3	A4	A2	A1	A4	A1	A4	A4	A1	A1	A4	A4	A2	A5	A5
191	2015-01-30 11:10:55	3	fr		2015-01-30 11:10:55	2015-01-30 11:03:51	A1	23	d2	d1	d1		A1		Y	4	N	0	2	A3	A2	A5	A4	A1	A4	A3	A4	A5	A4	A3	A3	A2	A4	A5	A4	A1	A5	A4	A4	A1	A1
192	2015-01-31 19:27:44	3	fr		2015-01-31 19:27:44	2015-01-31 19:23:50	A1	25	d1	d1	d1		A1		N	0	N	0	6	A4	A2	A5	A4	A3	A4	A3	A4	A5	A4	A3	A4	A3	A4	A5	A4	A2	A4	A5	A5	A1	A1
194	2015-02-04 06:00:32	3	fr		2015-02-04 06:00:32	2015-02-04 05:57:39	A1	37	d1	d1	d1		A2		N	0	N	0	4	A4	A2	A3	A4	A4	A3	A4	A5	A5	A2	A3	A2	A2	A5	A4	A4	A3	A5	A4	A5	A2	A3
195	2015-02-04 12:45:32	3	fr		2015-02-04 12:45:32	2015-02-04 12:42:33	A1	25	d1	d1		Armenien	A1		N	0	N	2	8	A4	A2	A5	A5	A5	A4	A3	A3	A4	A3	A4	A4	A4	A4	A4	A4	A3	A4	A4	A4	A2	A1
198	2015-02-05 08:45:38	3	fr		2015-02-05 08:45:38	2015-02-05 08:40:17	A1	45	d1	d1	d1			INDE	N	0	N	0	1	A4	A2	A3	A4	A4	A3	A4	A4	A4	A2	A2	A2	A2	A5	A5	A2	A1	A4	A5	A5	A3	A5
199	2015-02-05 11:19:24	3	fr		2015-02-05 11:19:24	2015-02-05 11:15:57	A1	34	d1	d1	d1		A2		Y	3	N	2	16	A3	A1	A5	A5	A2	A5	A5	A5	A5	A4	A5	A5	A5	A5	A5	A5	A5	A5	A5	A4	A4	A1
200	2015-02-05 12:11:39	3	fr		2015-02-05 12:11:39	2015-02-05 12:04:53	A1	30	d2	d1	d1		A1		Y	12	N	3	20	A4	A1	A5	A4	A1	A5	A4	A5	A5	A5	A4	A4	A5	A5	A5	A5	A4	A5	A5	A5	A1	A1
202	2015-02-06 11:20:50	3	fr		2015-02-06 11:20:50	2015-02-06 11:18:02	A1	25	d2	d1	d1		A2		Y	10	N	0	1	A3	A4	A3	A3	A5	A3	A2	A2	A4	A1	A1	A1	A1	A4	A2	A2	A1	A1	A3	A4	A1	A5
203	2015-02-06 11:21:46	3	fr		2015-02-06 11:21:46	2015-02-06 11:18:14	A1	24	d2	d1	d1		A2		Y	12	N	1	5	A4	A2	A4	A4	A1	A5	A3	A5	A5	A5	A4	A5	A3	A5	A2	A3	A1	A4	A4	A3	A1	A1
205	2015-02-06 11:22:23	3	fr		2015-02-06 11:22:23	2015-02-06 11:18:56	A1	19	d1	d1	d1		A2		N	4	N	1	18	A4	A1	A5	A5	A2	A5	A4	A5	A4	A4	A5	A5	A4	A5	A3	A3	A2	A4	A5	A4	A4	A3
206	2015-02-06 11:23:04	3	fr		2015-02-06 11:23:04	2015-02-06 11:19:14	A1	27	d2	d1	d1		A2		N	10	N	1	12	A3	A2	A4	A5	A1	A5	A3	A4	A4	A4	A2	A2	A4	A4	A3	A3	A1	A2	A3	A4	A4	A2
207	2015-02-06 11:23:22	3	fr		2015-02-06 11:23:22	2015-02-06 11:20:01	A1	21	d2	d1	d1		A2		N	6	N	0	5	A4	A1	A5	A5	A1	A2	A3	A5	A5	A5	A3	A3	A4	A5	A5	A5	A3	A5	A5	A5	A1	A1
208	2015-02-06 11:25:21	3	fr		2015-02-06 11:25:21	2015-02-06 11:20:14	A1	21	d2	d1	d1		A2		N	8	N	10	8	A4	A1	A5	A4	A1	A2	A4	A5	A5	A5	A3	A5	A5	A5	A5	A4	A1	A5	A5	A5	A3	A1
209	2015-02-06 11:25:56	3	fr		2015-02-06 11:25:56	2015-02-06 11:21:04	A1	23	d2	d1	d1		A2		N	0	N	0	56	A5	A1	A4	A5	A4	A4	A4	A4	A5	A3	A4	A3	A2	A4	A5	A3	A2	A4	A4	A4	A2	A3
211	2015-02-06 11:28:21	3	fr		2015-02-06 11:28:21	2015-02-06 11:21:09	A1	28	d1	d1	d10		A2		N	0	N	0	2	A5	A2	A5	A4	A2	A3	A5	A5	A5	A4	A2	A5	A1	A5	A5	A5	A2	A5	A5	A5	A1	A5
212	2015-02-06 11:27:56	3	fr		2015-02-06 11:27:56	2015-02-06 11:24:10	A1	25	d2	d1	d1		A2		N	4	N	0	4	A4	A2	A4	A3	A1	A3	A4	A4	A4	A4	A3	A4	A5	A4	A5	A4	A1	A4	A4	A4	A2	A1
213	2015-02-06 11:27:44	3	fr		2015-02-06 11:27:44	2015-02-06 11:24:38	A1	20	d2	d1	d1		A2		Y	2	N	0	20	A5	A1	A4	A4	A1	A3	A4	A5	A4	A5	A5	A5	A1	A5	A4	A5	A3	A4	A4	A4	A1	A2
214	2015-02-06 11:32:14	3	fr		2015-02-06 11:32:14	2015-02-06 11:25:00	A1	22	d1	d1	d1		A2		N	0	N	0	10	A4	A1	A5	A5	A1	A4	A4	A5	A4	A4	A4	A3	A3	A5	A5	A4	A2	A4	A3	A4	A2	A3
215	2015-02-06 11:30:29	3	fr		2015-02-06 11:30:29	2015-02-06 11:25:12	A1	20	d2	d1	d1		A2		N	0	N	1	3	A3	A2	A4	A5	A2	A3	A4	A5	A5	A4	A3	A5	A3	A4	A4	A4	A2	A3	A4	A5	A2	A2
217	2015-02-06 11:29:20	3	fr		2015-02-06 11:29:20	2015-02-06 11:25:33	A1	24	d1	d1	d1		A2		N	0	N	5	20	A4	A1	A5	A5	A1	A3	A3	A5	A3	A3	A3	A3	A5	A4	A4	A4	A4	A3	A3	A5	A1	A1
219	2015-02-06 11:27:54	3	fr		2015-02-06 11:27:54	2015-02-06 11:25:45	A1	23	d2	d1	d1		A2		Y	8	N	10	50	A4	A1	A4	A5	A1	A5	A5	A5	A5	A3	A3	A5	A5	A5	A5	A4	A2	A4	A4	A3	A1	A1
220	2015-02-06 11:27:45	3	fr		2015-02-06 11:27:45	2015-02-06 11:25:51	A1	19	d1	d1	d1		A2		N	4	N	3	15	A5	A1	A4	A5	A2	A4	A5	A5	A5	A4	A4	A5	A5	A5	A4	A3	A1	A5	A5	A4	A2	A1
222	2015-02-06 11:30:57	3	fr		2015-02-06 11:30:57	2015-02-06 11:26:06	A1	23	d1	d1	d1		A2		Y	8	N	3	15	A4	A1	A5	A5	A3	A4	A4	A5	A5	A4	A4	A2	A5	A5	A5	A3	A1	A4	A4	A5	A1	A1
225	2015-02-06 11:32:45	3	fr		2015-02-06 11:32:45	2015-02-06 11:26:16	A1	22	d1	d1	d1		A2		Y	11	N	0	40	A4	A1	A3	A4	A1	A4	A4	A4	A4	A4	A4	A4	A3	A2	A4	A3	A2	A4	A4	A3	A2	A1
226	2015-02-06 12:15:34	3	fr		2015-02-06 12:15:34	2015-02-06 11:26:21	A1	23	d2	d1	d1		A2		N	0	N	1	10	A4	A3	A5	A4	A2	A4	A3	A5	A3	A3	A2	A5	A5	A4	A5	A4	A2	A5	A3	A5	A2	A1
227	2015-02-06 11:31:41	3	fr		2015-02-06 11:31:41	2015-02-06 11:26:22	A1	32	d1	d1	d1		A2		N	0	N	0	1	A4	A2	A5	A5	A5	A4	A4	A5	A4	A1	A3	A4	A4	A4	A4	A3	A2	A4	A4	A2	A1	A2
228	2015-02-06 11:41:40	3	fr		2015-02-06 11:41:40	2015-02-06 11:27:38	A1	24	d2	d1	d1		A2		N	0	N	0.5	5	A4	A1	A5	A5	A5	A4	A2	A5	A5	A1	A2	A2	A1	A5	A4	A1	A1	A5	A5	A4	A1	A2
229	2015-02-06 11:33:54	3	fr		2015-02-06 11:33:54	2015-02-06 11:28:26	A1	23	d2	d1	d1		A2		Y	12	N	4	8	A3	A1	A4	A4	A5	A4	A4	A4	A5	A1	A3	A3	A5	A5	A5	A3	A3	A3	A5	A3	A1	A1
230	2015-02-06 11:35:22	3	fr		2015-02-06 11:35:22	2015-02-06 11:28:44	A1	20	d2	d1	d1		A2		N	7	N	0	18	A4	A4	A4	A4	A1	A3	A3	A3	A4	A4	A3	A2	A4	A4	A5	A5	A2	A3	A4	A4	A3	A2
232	2015-02-06 11:35:03	3	fr		2015-02-06 11:35:03	2015-02-06 11:28:52	A1	22	d1	d1	d1		A2		Y	9	N	4	5	A3	A2	A4	A4	A2	A4	A4	A5	A5	A2	A3	A2	A4	A5	A5	A4	A4	A5	A5	A5	A1	A1
233	2015-02-06 11:36:32	3	fr		2015-02-06 11:36:32	2015-02-06 11:29:15	A1	21	d2	d1	d1		A2		N	4	N	0	2	A4	A2	A3	A4	A2	A4	A5	A5	A3	A3	A2	A3	A2	A4	A5	A3	A1	A4	A4	A4	A2	A2
237	2015-02-06 11:38:00	3	fr		2015-02-06 11:38:00	2015-02-06 11:30:00	A1	20	d1	d1	d1		A2		Y	9	N	6	20	A5	A1	A4	A5	A1	A4	A4	A5	A4	A4	A5	A5	A4	A5	A4	A4	A2	A5	A5	A4	A2	A1
238	2015-02-06 11:33:46	3	fr		2015-02-06 11:33:46	2015-02-06 11:30:20	A1	21	d1	d1	d1		A2		N	0	N	0	20	A4	A2	A4	A4	A3	A2	A3	A4	A5	A3	A3	A4	A1	A5	A4	A3	A2	A4	A4	A3	A2	A3
239	2015-02-06 11:35:16	3	fr		2015-02-06 11:35:16	2015-02-06 11:31:21	A1	19	d2	d1	d1		A2		N	4	N	0	5	A5	A2	A5	A5	A1	A5	A3	A5	A5	A5	A3	A5	A4	A5	A5	A4	A1	A5	A5	A4	A2	A2
240	2015-02-06 11:37:22	3	fr		2015-02-06 11:37:22	2015-02-06 11:31:37	A1	23	d2	d1	d1		A2		Y	17	N	7	21	A5	A1	A5	A5	A2	A4	A4	A4	A5	A4	A3	A4	A5	A5	A5	A5	A4	A5	A5	A5	A1	A1
241	2015-02-06 11:36:09	3	fr		2015-02-06 11:36:09	2015-02-06 11:31:45	A1	26	d1	d1	d1		A2		N	0	N	0	7	A4	A1	A5	A5	A4	A3	A4	A4	A4	A2	A3	A4	A3	A5	A2	A3	A2	A3	A4	A3	A2	A2
242	2015-02-06 11:39:39	3	fr		2015-02-06 11:39:39	2015-02-06 11:33:19	A1	22	d2	d1	d1		A2		Y	8	N	1	4	A3	A2	A4	A3	A4	A4	A3	A3	A4	A2	A2	A1	A1	A4	A4	A3	A1	A1	A3	A3	A2	A3
243	2015-02-06 11:37:37	3	fr		2015-02-06 11:37:37	2015-02-06 11:33:24	A1	20	d2	d1	d1		A2		N	14	N	1	5	A3	A1	A4	A4	A1	A4	A4	A2	A4	A5	A4	A1	A4	A3	A5	A3	A1	A2	A4	A4	A2	A4
245	2015-02-06 11:38:33	3	fr		2015-02-06 11:38:33	2015-02-06 11:33:33	A1	22	d2	d1	d1		A2		Y	15	Y	10	0	A3	A4	A5	A5	A3	A3	A2	A5	A4	A3	A3	A4	A5	A5	A5	A5	A3	A5	A5	A3	A1	A1
246	2015-02-06 11:41:24	3	fr		2015-02-06 11:41:24	2015-02-06 11:35:20	A1	21	d2	d1	d1		A2		N	0	N	0	6	A4	A1	A5	A4	A1	A4	A4	A5	A5	A5	A5	A5	A5	A5	A5	A5	A1	A5	A4	A5	A1	A1
247	2015-02-06 11:39:15	3	fr		2015-02-06 11:39:15	2015-02-06 11:35:50	A1	22	d2	d1	d1		A2		Y	7	N	0	2	A4	A2	A5	A5	A4	A3	A3	A5	A5	A1	A3	A5	A4	A4	A5	A3	A2	A5	A4	A4	A2	A1
248	2015-02-06 11:41:44	3	fr		2015-02-06 11:41:44	2015-02-06 11:36:44	A1	20	d2	d1	d1		A2		N	0	N	0	6	A4	A1	A5	A5	A2	A4	A3	A4	A5	A4	A3	A3	A3	A5	A5	A4	A1	A3	A5	A4	A1	A2
251	2015-02-06 11:41:32	3	fr		2015-02-06 11:41:32	2015-02-06 11:38:00	A1	21	d1	d1	d1		A2		N	0	N	0	30	A4	A1	A4	A5	A3	A4	A4	A3	A3	A2	A4	A2	A3	A4	A3	A4	A2	A3	A4	A3	A2	A3
252	2015-02-06 11:41:47	3	fr		2015-02-06 11:41:47	2015-02-06 11:38:04	A1	21	d2	d1	d1		A2		N	0	N	0	12	A2	A1	A4	A4	A2	A1	A3	A4	A2	A5	A2	A1	A1	A5	A1	A1	A1	A1	A1	A1	A1	A1
253	2015-02-06 11:44:19	3	fr		2015-02-06 11:44:19	2015-02-06 11:38:17	A1	20	d2	d1	d1		A2		N	0	N	0	30	A4	A1	A4	A5	A1	A3	A4	A4	A4	A5	A4	A3	A3	A4	A5	A2	A1	A2	A3	A4	A2	A2
256	2015-02-06 11:43:10	3	fr		2015-02-06 11:43:10	2015-02-06 11:39:48	A1	22	d2	d1	d1		A2		N	0	N	0	3	A4	A2	A5	A5	A2	A4	A3	A5	A4	A3	A3	A4	A1	A4	A4	A4	A1	A3	A4	A4	A1	A2
257	2015-02-06 11:43:03	3	fr		2015-02-06 11:43:03	2015-02-06 11:40:28	A1	23	d2	d1	d1		A2		N	0	N	0	8	A2	A1	A4	A4	A3	A2	A4	A4	A3	A3	A4	A4	A2	A4	A4	A4	A2	A4	A4	A2	A2	A2
258	2015-02-06 11:43:36	3	fr		2015-02-06 11:43:36	2015-02-06 11:40:48	A1	28	d2	d1	d1		A2		Y	6	N	1	6	A5	A1	A4	A4	A1	A5	A1	A2	A3	A5	A2	A1	A4	A4	A4	A5	A1	A1	A4	A5	A3	A4
260	2015-02-06 11:48:08	3	fr		2015-02-06 11:48:08	2015-02-06 11:41:25	A1	23	d1	d1	d1		A2		N	7	N	7	7	A4	A5	A5	A3	A1	A4	A4	A5	A4	A5	A3	A4	A5	A5	A4	A4	A3	A5	A4	A5	A2	A1
261	2015-02-06 11:45:39	3	fr		2015-02-06 11:45:39	2015-02-06 11:42:38	A1	19	d1	d1	d1		A2		N	0	N	0	10	A4	A2	A5	A3	A2	A3	A4	A5	A4	A3	A3	A5	A1	A3	A3	A4	A2	A4	A4	A3	A2	A3
262	2015-02-06 11:46:19	3	fr		2015-02-06 11:46:19	2015-02-06 11:43:16	A1	18	d2	d1	d1		A2		N	0	N	1	5	A3	A2	A5	A4	A5	A3	A5	A5	A5	A2	A3	A5	A5	A5	A5	A5	A4	A5	A5	A4	A1	A1
263	2015-02-06 11:47:30	3	fr		2015-02-06 11:47:30	2015-02-06 11:43:46	A1	25	d2	d1	d10		A2		N	0	N	0	20	A4	A1	A2	A4	A2	A2	A4	A3	A4	A4	A3	A1	A4	A5	A4	A2	A1	A4	A4	A3	A1	A2
264	2015-02-06 11:48:45	3	fr		2015-02-06 11:48:45	2015-02-06 11:44:01	A1	19	d2	d1	d1		A2		N	0	N	0	10	A5	A1	A5	A4	A2	A4	A4	A5	A4	A3	A4	A3	A2	A4	A3	A3	A2	A4	A4	A3	A2	A4
266	2015-02-06 11:46:54	3	fr		2015-02-06 11:46:54	2015-02-06 11:44:40	A1	25	d1	d1	d1		A2		Y	4	N	0	16	A4	A2	A4	A4	A4	A4	A4	A5	A4	A2	A3	A1	A2	A4	A3	A4	A1	A5	A4	A3	A2	A4
269	2015-02-06 11:48:50	3	fr		2015-02-06 11:48:50	2015-02-06 11:45:30	A1	22	d1	d1	d1		A2		Y	10	N	1	12	A3	A2	A3	A4	A5	A3	A3	A4	A5	A4	A2	A2	A3	A4	A4	A3	A2	A4	A3	A4	A1	A1
270	2015-02-06 11:49:57	3	fr		2015-02-06 11:49:57	2015-02-06 11:45:50	A1	21	d2	d1	d3			Amérique Latine	N	0	N	0	21	A3	A1	A4	A5	A1	A4	A3	A5	A5	A5	A3	A2	A3	A4	A5	A3	A1	A4	A5	A5	A3	A4
271	2015-02-06 11:51:34	3	fr		2015-02-06 11:51:34	2015-02-06 11:46:03	A1	24	d2	d1	d1		A2		N	1	N	0	0	A4	A5	A3	A2	A4	A3	A1	A5	A2	A1	A1	A5	A1	A2	A3	A3	A1	A2	A1	A3	A1	A2
273	2015-02-06 11:51:09	3	fr		2015-02-06 11:51:09	2015-02-06 11:46:44	A1	20	d1	d1	d1		A2		N	0	N	0	20	A3	A1	A4	A2	A3	A4	A5	A4	A5	A4	A5	A2	A3	A3	A2	A3	A2	A3	A3	A3	A1	A2
274	2015-02-06 11:51:41	3	fr		2015-02-06 11:51:41	2015-02-06 11:48:07	A1	22	d2	d1	d1		A2		N	0	N	0	24	A5	A2	A4	A4	A2	A4	A4	A4	A5	A3	A2	A3	A1	A4	A2	A4	A2	A2	A4	A4	A2	A2
275	2015-02-06 11:52:37	3	fr		2015-02-06 11:52:37	2015-02-06 11:48:10	A1	22	d2	d1	d1		A2		N	0	N	0	20	A4	A1	A5	A5	A1	A2	A3	A4	A5	A5	A3	A4	A1	A4	A5	A2	A2	A4	A5	A5	A3	A1
276	2015-02-06 11:57:43	3	fr		2015-02-06 11:57:43	2015-02-06 11:48:15	A1	18	d2	d1	d1		A2		N	4	N	0	25	A5	A1	A4	A4	A2	A3	A4	A5	A5	A3	A4	A5	A2	A5	A5	A3	A3	A4	A5	A4	A1	A3
278	2015-02-06 11:51:58	3	fr		2015-02-06 11:51:58	2015-02-06 11:49:01	A1	20	d2	d1	d1		A2		N	1	N	0	30	A3	A1	A4	A5	A2	A4	A4	A5	A5	A4	A4	A5	A3	A5	A5	A4	A4	A4	A5	A5	A4	A2
279	2015-02-06 11:52:49	3	fr		2015-02-06 11:52:49	2015-02-06 11:49:41	A1	20	d2	d1	d1		A2		N	0	N	0	28	A4	A1	A4	A5	A2	A4	A5	A2	A5	A4	A4	A2	A5	A5	A5	A4	A3	A4	A5	A4	A1	A1
280	2015-02-06 11:53:12	3	fr		2015-02-06 11:53:12	2015-02-06 11:49:48	A1	19	d2	d1	d1		A2		N	0	N	0	14	A5	A1	A4	A5	A1	A2	A2	A5	A5	A5	A4	A4	A1	A5	A5	A2	A1	A5	A5	A5	A1	A1
282	2015-02-06 11:53:44	3	fr		2015-02-06 11:53:44	2015-02-06 11:51:13	A1	22	d2	d1	d1		A2		N	5	N	1	20	A4	A1	A5	A4	A1	A5	A5	A5	A5	A5	A5	A5	A4	A4	A5	A5	A4	A5	A3	A5	A2	A1
284	2015-02-06 11:55:45	3	fr		2015-02-06 11:55:45	2015-02-06 11:51:41	A1	20	d1	d1	d1		A2		N	2	N	0	6	A4	A1	A4	A4	A2	A3	A5	A4	A5	A3	A5	A3	A1	A4	A4	A4	A3	A4	A4	A4	A3	A1
287	2015-02-06 11:54:38	3	fr		2015-02-06 11:54:38	2015-02-06 11:52:19	A1	25	d2	d1	d1		A2		N	0	N	0	20	A5	A1	A4	A4	A1	A5	A4	A4	A4	A5	A4	A2	A2	A5	A3	A5	A2	A4	A5	A5	A4	A2
288	2015-02-06 11:58:24	3	fr		2015-02-06 11:58:24	2015-02-06 11:53:05	A1	21	d2	d1	d1		A2		N	3	N	0	8	A4	A2	A4	A3	A2	A1	A4	A4	A4	A3	A2	A1	A1	A4	A2	A4	A1	A3	A4	A2	A5	A4
290	2015-02-06 11:57:45	3	fr		2015-02-06 11:57:45	2015-02-06 11:53:56	A1	19	d2	d1	d1		A2		N	0	N	0	50	A5	A1	A5	A5	A1	A3	A4	A5	A5	A5	A5	A5	A5	A5	A5	A4	A3	A4	A4	A5	A1	A1
291	2015-02-06 11:58:43	3	fr		2015-02-06 11:58:43	2015-02-06 11:54:07	A1	19	d2	d1	d1		A2		N	0	N	0	21	A5	A1	A5	A5	A2	A4	A5	A5	A4	A4	A4	A3	A3	A4	A5	A3	A1	A4	A5	A4	A2	A2
292	2015-02-06 11:57:20	3	fr		2015-02-06 11:57:20	2015-02-06 11:54:10	A1	20	d2	d1	d1		A2		N	0	N	0	2	A4	A2	A5	A5	A1	A3	A3	A5	A5	A5	A3	A5	A3	A5	A5	A4	A1	A3	A4	A3	A3	A4
293	2015-02-06 11:59:47	3	fr		2015-02-06 11:59:47	2015-02-06 11:54:17	A1	18	d2	d1	d11		A2		N	0	N	5	4	A5	A3	A5	A4	A1	A3	A2	A5	A5	A5	A5	A3	A5	A5	A5	A5	A3	A2	A4	A5	A1	A1
294	2015-02-06 12:01:17	3	fr		2015-02-06 12:01:17	2015-02-06 11:54:25	A1	19	d1	d1	d1		A2		Y	5	N	1	20	A3	A1	A5	A4	A4	A2	A2	A5	A5	A2	A4	A5	A4	A5	A5	A3	A1	A5	A5	A4	A1	A1
296	2015-02-06 12:01:31	3	fr		2015-02-06 12:01:31	2015-02-06 11:57:15	A1	22	d2	d1	d1		A2		N	0	N	0	30	A5	A1	A4	A4	A1	A4	A4	A5	A4	A4	A3	A2	A4	A5	A5	A4	A2	A4	A4	A4	A2	A2
297	2015-02-06 12:01:07	3	fr		2015-02-06 12:01:07	2015-02-06 11:58:44	A1	18	d1	d1	d1		A2		N	0	N	10	10	A4	A2	A5	A5	A5	A3	A4	A5	A5	A1	A2	A2	A1	A4	A2	A3	A1	A5	A3	A5	A1	A1
299	2015-02-06 12:03:23	3	fr		2015-02-06 12:03:23	2015-02-06 11:59:36	A1	26	d2	d1	d1		A2		N	0	N	0	15	A5	A1	A4	A4	A2	A4	A4	A4	A4	A4	A3	A3	A2	A4	A4	A4	A2	A3	A3	A4	A1	A1
300	2015-02-06 12:04:34	3	fr		2015-02-06 12:04:34	2015-02-06 11:59:50	A1	31	d1	d1	d3		A2		N	1	N	0	40	A4	A1	A1	A1	A3	A4	A5	A4	A3	A2	A5	A1	A1	A3	A3	A4	A4	A4	A4	A4	A1	A3
302	2015-02-06 12:03:31	3	fr		2015-02-06 12:03:31	2015-02-06 12:00:49	A1	20	d1	d1	d1		A2		N	0	N	0	20	A4	A2	A2	A5	A1	A5	A5	A4	A4	A4	A5	A2	A1	A5	A5	A4	A1	A5	A4	A4	A1	A4
303	2015-02-06 12:08:17	3	fr		2015-02-06 12:08:17	2015-02-06 12:01:29	A1	18	d2	d1	d1		A2		Y	10	N	4	8	A3	A1	A4	A5	A1	A3	A3	A4	A5	A5	A5	A1	A3	A4	A4	A2	A4	A4	A5	A5	A3	A1
304	2015-02-06 12:07:07	3	fr		2015-02-06 12:07:07	2015-02-06 12:03:49	A1	22	d2	d2	d1		A2		N	0	N	0	5	A4	A2	A4	A3	A2	A3	A3	A4	A5	A2	A3	A4	A3	A4	A4	A4	A3	A4	A5	A5	A4	A3
306	2015-02-06 12:07:57	3	fr		2015-02-06 12:07:57	2015-02-06 12:04:18	A1	22	d1	d1	d1		A2		N	0	N	0	7	A3	A1	A4	A5	A5	A1	A5	A4	A5	A1	A3	A1	A1	A5	A4	A4	A1	A1	A5	A4	A4	A4
309	2015-02-06 12:11:15	3	fr		2015-02-06 12:11:15	2015-02-06 12:06:51	A1	39	d2	d1	d1		A2		N	0	N	0	10	A2	A2	A4	A5	A2	A4	A4	A5	A5	A4	A5	A5	A4	A5	A5	A4	A2	A5	A5	A4	A4	A1
312	2015-02-06 12:14:05	3	fr		2015-02-06 12:14:05	2015-02-06 12:10:39	A1	20	d2	d1	d1		A2		N	0	N	0	3	A4	A3	A3	A5	A3	A2	A1	A5	A4	A3	A1	A2	A1	A3	A3	A3	A1	A5	A4	A1	A3	A4
315	2015-02-06 12:14:25	3	fr		2015-02-06 12:14:25	2015-02-06 12:11:42	A1	21	d1	d1	d1		A2		Y	2	N	1	10	A4	A1	A5	A5	A1	A4	A3	A5	A2	A5	A3	A3	A2	A3	A4	A5	A1	A5	A5	A5	A2	A2
317	2015-02-06 12:16:36	3	fr		2015-02-06 12:16:36	2015-02-06 12:13:44	A1	19	d1	d1	d1		A2		N	0	N	0	25	A4	A2	A3	A4	A5	A4	A3	A3	A4	A1	A3	A1	A1	A2	A4	A3	A1	A3	A1	A3	A2	A3
318	2015-02-06 12:18:11	3	fr		2015-02-06 12:18:11	2015-02-06 12:13:50	A1	19	d2	d1	d1		A2		Y	4	N	0	8	A5	A1	A4	A5	A1	A4	A4	A5	A5	A5	A5	A5	A4	A5	A5	A5	A3	A5	A5	A5	A2	A2
327	2015-02-06 12:26:24	3	fr		2015-02-06 12:26:24	2015-02-06 12:21:25	A1	19	d2	d1	d1		A2		N	0	N	0	5	A4	A2	A5	A5	A1	A4	A4	A4	A5	A4	A5	A3	A3	A4	A4	A4	A3	A4	A5	A4	A2	A2
328	2015-02-06 12:26:46	3	fr		2015-02-06 12:26:46	2015-02-06 12:22:04	A1	20	d1	d1	d1		A2		N	0	N	0	21	A4	A1	A5	A5	A5	A3	A4	A5	A4	A1	A3	A2	A2	A4	A4	A3	A2	A5	A4	A3	A1	A4
329	2015-02-06 12:30:16	3	fr		2015-02-06 12:30:16	2015-02-06 12:22:34	A1	18	d2	d1	d1		A2		N	0	N	0	7	A4	A2	A5	A5	A2	A1	A2	A5	A5	A4	A3	A4	A4	A5	A4	A3	A1	A5	A3	A3	A2	A2
330	2015-02-06 12:27:33	3	fr		2015-02-06 12:27:33	2015-02-06 12:24:03	A1	18	d1	d3	d1		A2		N	0	N	0	12	A4	A1	A4	A5	A5	A3	A4	A4	A4	A1	A4	A1	A3	A4	A4	A3	A1	A3	A3	A4	A2	A2
331	2015-02-06 12:32:17	3	fr		2015-02-06 12:32:17	2015-02-06 12:26:07	A1	21	d2	d1		malgache		madagascar	Y	3	N	0	5	A4	A2	A4	A4	A5	A4	A4	A4	A4	A2	A4	A3	A4	A4	A4	A3	A2	A4	A4	A2	A2	A2
334	2015-02-06 12:30:39	3	fr		2015-02-06 12:30:39	2015-02-06 12:26:42	A1	21	d2	d1	d1		A2		N	0	N	0	15	A4	A1	A5	A5	A4	A4	A3	A5	A5	A1	A3	A4	A1	A5	A4	A4	A3	A4	A5	A4	A1	A1
336	2015-02-06 12:30:38	3	fr		2015-02-06 12:30:38	2015-02-06 12:27:21	A1	24	d2	d1	d1		A2		Y	10	N	0	10	A4	A2	A4	A5	A1	A3	A4	A5	A4	A5	A3	A5	A4	A4	A5	A3	A2	A5	A4	A5	A2	A1
337	2015-02-06 12:31:21	3	fr		2015-02-06 12:31:21	2015-02-06 12:27:22	A1	26	d2	d1	d1		A2		Y	8	N	4	20	A4	A1	A4	A5	A3	A4	A3	A4	A5	A2	A3	A1	A4	A5	A3	A4	A2	A4	A4	A4	A3	A4
339	2015-02-06 12:35:17	3	fr		2015-02-06 12:35:17	2015-02-06 12:30:23	A1	21	d2	d1	d1		A2		N	2	N	0	2	A4	A4	A4	A4	A2	A3	A3	A4	A3	A4	A2	A1	A2	A3	A3	A3	A1	A3	A3	A4	A3	A3
341	2015-02-06 12:38:27	3	fr		2015-02-06 12:38:27	2015-02-06 12:34:56	A1	20	d1	d1	d1		A2		N	0	N	0	25	A5	A2	A4	A5	A2	A4	A4	A5	A5	A4	A3	A5	A4	A5	A5	A4	A3	A5	A5	A4	A3	A3
342	2015-02-06 12:39:44	3	fr		2015-02-06 12:39:44	2015-02-06 12:36:24	A1	18	d2	d1	d1		A2		Y	5	N	3	10	A4	A1	A5	A5	A1	A4	A4	A5	A5	A4	A4	A5	A5	A5	A5	A3	A1	A5	A5	A5	A3	A1
343	2015-02-06 12:40:17	3	fr		2015-02-06 12:40:17	2015-02-06 12:37:18	A1	24	d2	d1	d1		A2		N	4	N	1	15	A4	A2	A5	A4	A1	A1	A3	A5	A5	A5	A5	A5	A4	A5	A2	A1	A3	A5	A5	A5	A2	A2
344	2015-02-06 12:42:14	3	fr		2015-02-06 12:42:14	2015-02-06 12:37:22	A1	20	d2	d1	d1		A2		N	0	N	0	14	A1	A2	A3	A4	A5	A1	A1	A2	A4	A1	A2	A1	A1	A4	A1	A3	A1	A2	A3	A1	A1	A5
345	2015-02-06 12:46:45	3	fr		2015-02-06 12:46:45	2015-02-06 12:38:19	A1	18	d2	d1	d1		A2		N	4	N	0	8	A5	A1	A4	A5	A2	A4	A5	A5	A5	A2	A4	A2	A1	A5	A4	A4	A4	A4	A5	A4	A2	A1
346	2015-02-06 12:43:01	3	fr		2015-02-06 12:43:01	2015-02-06 12:38:19	A1	23	d2	d1	d1		A2		N	5	N	0	20	A5	A1	A4	A5	A2	A4	A5	A5	A5	A4	A4	A1	A1	A5	A5	A4	A2	A5	A5	A5	A1	A1
347	2015-02-06 12:45:42	3	fr		2015-02-06 12:45:42	2015-02-06 12:38:46	A1	23	d2	d1	d1		A2		N	0	N	0	8	A4	A1	A4	A5	A1	A3	A3	A5	A5	A3	A3	A4	A1	A5	A5	A5	A1	A5	A4	A4	A1	A2
348	2015-02-06 12:44:21	3	fr		2015-02-06 12:44:21	2015-02-06 12:39:07	A1	25	d1	d1	d1		A2		N	4	N	0	12	A2	A1	A4	A5	A5	A2	A1	A5	A5	A1	A4	A4	A1	A5	A4	A2	A1	A5	A5	A5	A1	A3
349	2015-02-06 12:50:18	3	fr		2015-02-06 12:50:18	2015-02-06 12:39:26	A1	23	d2	d1	d1		A2		N	0	N	0	9	A5	A1	A5	A4	A1	A4	A4	A5	A5	A5	A2	A4	A2	A5	A4	A4	A1	A3	A4	A5	A1	A2
350	2015-02-06 12:45:04	3	fr		2015-02-06 12:45:04	2015-02-06 12:41:06	A1	19	d1	d1	d1		A2		N	9	N	3	20	A5	A1	A5	A5	A2	A3	A5	A5	A5	A3	A4	A5	A5	A5	A4	A4	A4	A5	A5	A5	A1	A1
351	2015-02-06 12:47:29	3	fr		2015-02-06 12:47:29	2015-02-06 12:42:42	A1	24	d2	d1	d1		A2		Y	4	N	0	10	A4	A2	A4	A5	A3	A3	A4	A4	A4	A4	A4	A4	A2	A5	A3	A3	A3	A4	A5	A3	A3	A1
352	2015-02-06 12:45:08	3	fr		2015-02-06 12:45:08	2015-02-06 12:42:53	A1	21	d1	d1	d1		A2		N	0	N	0	100	A4	A1	A4	A4	A5	A4	A4	A4	A4	A1	A3	A4	A1	A4	A4	A4	A3	A4	A3	A4	A3	A3
356	2015-02-06 12:51:35	3	fr		2015-02-06 12:51:35	2015-02-06 12:46:31	A1	21	d2	d1	d1		A2		N	4	N	0	20	A4	A1	A5	A5	A2	A5	A4	A4	A5	A4	A3	A4	A5	A5	A4	A5	A3	A5	A5	A4	A2	A2
360	2015-02-06 12:55:08	3	fr		2015-02-06 12:55:08	2015-02-06 12:49:59	A1	21	d2	d1	d1		A2		Y	6	N	1	100	A5	A1	A4	A5	A1	A5	A5	A5	A5	A5	A5	A3	A4	A5	A5	A5	A4	A5	A5	A5	A2	A1
361	2015-02-06 12:58:35	3	fr		2015-02-06 12:58:35	2015-02-06 12:52:40	A1	19	d2	d1	d1		A2		N	0	N	0	6	A4	A1	A5	A5	A5	A1	A2	A4	A5	A1	A4	A4	A1	A2	A4	A4	A3	A4	A4	A2	A2	A1
362	2015-02-06 12:55:25	3	fr		2015-02-06 12:55:25	2015-02-06 12:52:42	A1	20	d2	d1	d1		A2		N	0	N	0	10	A3	A2	A4	A5	A2	A3	A3	A3	A3	A3	A4	A2	A4	A4	A5	A3	A2	A2	A2	A3	A2	A1
366	2015-02-06 13:02:53	3	fr		2015-02-06 13:02:53	2015-02-06 12:54:15	A1	20	d2	d1	d1		A2		N	0	N	0	8	A4	A2	A4	A5	A1	A2	A4	A4	A4	A5	A1	A5	A1	A4	A2	A3	A1	A4	A4	A4	A3	A2
368	2015-02-06 12:58:18	3	fr		2015-02-06 12:58:18	2015-02-06 12:54:52	A1	19	d2	d1	d1		A2		Y	13	N	10	25	A5	A1	A5	A5	A1	A5	A5	A5	A5	A5	A5	A5	A5	A5	A5	A5	A5	A5	A5	A5	A1	A1
369	2015-02-06 13:00:07	3	fr		2015-02-06 13:00:07	2015-02-06 12:55:02	A1	38	d2	d1	d1		A2		N	2	N	0	10	A3	A2	A3	A5	A2	A3	A5	A4	A5	A4	A3	A5	A1	A4	A5	A4	A2	A4	A3	A5	A1	A2
370	2015-02-06 13:00:10	3	fr		2015-02-06 13:00:10	2015-02-06 12:56:40	A1	39	d2	d1	d1		A2		Y	5	N	0	1	A3	A2	A5	A5	A5	A1	A3	A5	A5	A3	A2	A5	A1	A5	A1	A1	A3	A5	A5	A3	A1	A3
371	2015-02-06 13:01:20	3	fr		2015-02-06 13:01:20	2015-02-06 12:58:16	A1	24	d1	d1	d1		A2		N	0	N	10	20	A4	A1	A5	A2	A5	A4	A5	A5	A5	A1	A5	A1	A4	A4	A4	A4	A2	A4	A3	A4	A1	A2
372	2015-02-06 13:02:38	3	fr		2015-02-06 13:02:38	2015-02-06 12:58:37	A1	19	d2	d1	d1		A2		N	5	N	0	1	A4	A5	A4	A3	A2	A2	A2	A4	A4	A4	A2	A3	A3	A2	A4	A3	A1	A1	A4	A3	A2	A3
374	2015-02-06 13:04:12	3	fr		2015-02-06 13:04:12	2015-02-06 12:59:42	A1	20	d1	d1	d1		A2		N	5	N	3	3	A5	A1	A4	A5	A1	A3	A3	A5	A5	A3	A3	A5	A3	A4	A3	A4	A3	A5	A4	A4	A3	A1
376	2015-02-06 13:08:39	3	fr		2015-02-06 13:08:39	2015-02-06 13:02:22	A1	22	d1	d1	d1		A2		N	0	N	0	2	A4	A1	A4	A3	A2	A4	A5	A4	A5	A3	A4	A1	A5	A4	A2	A5	A4	A3	A4	A5	A2	A1
377	2015-02-06 13:07:29	3	fr		2015-02-06 13:07:29	2015-02-06 13:04:27	A1	21	d2	d1	d1		A2		Y	10	N	3	9	A5	A1	A4	A4	A2	A5	A4	A5	A5	A3	A4	A5	A5	A5	A3	A5	A2	A5	A5	A3	A1	A2
381	2015-02-06 13:08:31	3	fr		2015-02-06 13:08:31	2015-02-06 13:05:12	A1	21	d2	d1	d1		A2		N	3	N	3	24	A5	A1	A5	A5	A4	A5	A4	A5	A5	A3	A4	A4	A3	A5	A4	A5	A1	A5	A5	A3	A1	A2
383	2015-02-06 13:15:19	3	fr		2015-02-06 13:15:19	2015-02-06 13:09:38	A1	30	d2	d1	d1		A2		N	5	N	0	10	A4	A1	A4	A5	A1	A4	A4	A5	A5	A5	A2	A4	A5	A5	A4	A5	A3	A4	A4	A4	A1	A1
385	2015-02-06 13:15:56	3	fr		2015-02-06 13:15:56	2015-02-06 13:09:56	A1	20	d2	d1	d1		A2		N	0	N	0	9	A3	A2	A5	A4	A1	A3	A4	A5	A4	A4	A5	A4	A4	A3	A4	A4	A2	A4	A4	A5	A2	A3
386	2015-02-06 13:14:36	3	fr		2015-02-06 13:14:36	2015-02-06 13:10:11	A1	22	d1	d1	d1		A2		N	4	N	0	5	A5	A4	A5	A4	A4	A3	A3	A4	A4	A3	A5	A1	A3	A4	A5	A4	A1	A4	A4	A4	A2	A2
387	2015-02-06 13:15:20	3	fr		2015-02-06 13:15:20	2015-02-06 13:10:18	A1	25	d2	d1	d1		A2		N	0	N	0	1	A4	A3	A4	A3	A1	A3	A4	A5	A5	A5	A3	A5	A1	A4	A4	A3	A2	A5	A4	A5	A2	A1
388	2015-02-06 13:16:13	3	fr		2015-02-06 13:16:13	2015-02-06 13:11:31	A1	24	d2	d1	d1		A2		N	4	N	0	1	A3	A5	A3	A2	A2	A3	A3	A2	A2	A3	A1	A1	A2	A2	A4	A3	A1	A2	A2	A4	A5	A5
389	2015-02-06 13:15:32	3	fr		2015-02-06 13:15:32	2015-02-06 13:11:47	A1	35	d2	d1	d1		A2		N	0	N	1	10	A3	A1	A5	A4	A1	A3	A4	A5	A5	A5	A4	A5	A5	A5	A5	A5	A3	A4	A4	A5	A1	A1
390	2015-02-06 13:15:46	3	fr		2015-02-06 13:15:46	2015-02-06 13:12:16	A1	19	d1	d1	d1			banlieue	N	1	N	10	10	A2	A1	A5	A4	A5	A3	A4	A5	A5	A1	A4	A4	A3	A3	A4	A3	A2	A5	A4	A2	A4	A2
391	2015-02-06 13:14:45	3	fr		2015-02-06 13:14:45	2015-02-06 13:12:20	A1	21	d2	d1	d1		A2		Y	14	N	7	20	A4	A1	A4	A2	A1	A4	A5	A5	A4	A4	A4	A3	A5	A4	A5	A4	A3	A4	A4	A4	A1	A1
392	2015-02-06 13:17:01	3	fr		2015-02-06 13:17:01	2015-02-06 13:13:43	A1	22	d1	d1	d1		A2		Y	15	Y	7	7	A4	A1	A5	A5	A2	A5	A5	A5	A4	A2	A4	A5	A5	A4	A2	A2	A4	A5	A3	A4	A1	A1
393	2015-02-06 13:19:52	3	fr		2015-02-06 13:19:52	2015-02-06 13:15:48	A1	20	d2	d1	d1		A2		N	0	N	0	22	A4	A1	A3	A5	A2	A3	A2	A4	A4	A5	A3	A4	A3	A5	A5	A2	A2	A4	A3	A5	A2	A1
394	2015-02-06 13:18:13	3	fr		2015-02-06 13:18:13	2015-02-06 13:15:48	A1	18	d1	d1	d1		A2		N	0	N	0	20	A5	A3	A4	A5	A5	A5	A5	A5	A5	A3	A4	A3	A3	A5	A5	A5	A4	A5	A5	A5	A2	A3
395	2015-02-06 13:20:15	3	fr		2015-02-06 13:20:15	2015-02-06 13:16:42	A1	36	d1	d3	d1		A2		N	5	N	0	1	A3	A2	A4	A4	A4	A4	A4	A5	A4	A2	A2	A4	A2	A5	A5	A4	A2	A5	A4	A5	A1	A1
396	2015-02-06 13:21:29	3	fr		2015-02-06 13:21:29	2015-02-06 13:18:28	A1	22	d2	d1	d1		A2		Y	14	N	5	30	A5	A1	A4	A4	A3	A4	A5	A5	A5	A4	A4	A5	A5	A5	A4	A4	A3	A5	A5	A5	A1	A2
397	2015-02-06 13:21:46	3	fr		2015-02-06 13:21:46	2015-02-06 13:18:59	A1	23	d2	d1	d1		A2		N	0	N	0	10	A5	A1	A5	A5	A1	A4	A4	A5	A5	A5	A5	A5	A4	A4	A5	A3	A3	A5	A4	A5	A2	A2
398	2015-02-06 13:22:49	3	fr		2015-02-06 13:22:49	2015-02-06 13:19:03	A1	21	d2	d1	d1		A2		N	0	N	0	2	A5	A3	A4	A3	A1	A3	A4	A5	A4	A3	A3	A4	A1	A4	A4	A5	A2	A4	A3	A4	A3	A4
401	2015-02-06 15:57:27	3	fr		2015-02-06 15:57:27	2015-02-06 13:20:27	A1	22	d2	d1	d1		A2		N	8	N	1	7	A3	A1	A4	A5	A2	A4	A4	A4	A4	A4	A3	A4	A5	A4	A4	A3	A4	A4	A5	A3	A2	A1
402	2015-02-06 13:24:18	3	fr		2015-02-06 13:24:18	2015-02-06 13:20:31	A1	21	d2	d1	d1		A2		N	0	N	0	4	A5	A3	A3	A4	A1	A3	A4	A5	A4	A4	A1	A4	A2	A3	A4	A5	A2	A4	A2	A4	A4	A5
404	2015-02-06 13:27:12	3	fr		2015-02-06 13:27:12	2015-02-06 13:23:43	A1	22	d2	d1	d1		A2		N	0	N	2	20	A5	A1	A4	A4	A4	A5	A3	A5	A4	A2	A3	A5	A2	A4	A5	A4	A3	A5	A4	A4	A3	A1
408	2015-02-06 13:31:35	3	fr		2015-02-06 13:31:35	2015-02-06 13:26:46	A1	20	d2	d1	d1		A2		Y	5	N	0	10	A5	A2	A5	A4	A4	A3	A3	A5	A4	A1	A3	A5	A2	A2	A3	A4	A3	A5	A5	A4	A1	A2
410	2015-02-06 13:36:44	3	fr		2015-02-06 13:36:44	2015-02-06 13:29:29	A1	24	d2	d1	d1		A2		N	4	N	0	14	A4	A1	A4	A5	A2	A4	A3	A5	A4	A3	A4	A2	A3	A5	A4	A4	A2	A4	A3	A4	A4	A4
411	2015-02-06 13:33:58	3	fr		2015-02-06 13:33:58	2015-02-06 13:30:35	A1	22	d1	d1	d1		A2		N	0	N	0	30	A4	A1	A5	A5	A3	A4	A4	A5	A4	A2	A4	A4	A1	A5	A2	A4	A2	A5	A4	A4	A2	A5
412	2015-02-06 13:36:41	3	fr		2015-02-06 13:36:41	2015-02-06 13:31:42	A1	18	d2	d1	d1		A2		N	0	N	0	5	A4	A3	A4	A3	A2	A5	A4	A5	A4	A4	A3	A3	A4	A2	A4	A4	A3	A5	A3	A3	A2	A3
414	2015-02-06 13:36:31	3	fr		2015-02-06 13:36:31	2015-02-06 13:32:28	A1	21	d1	d1	d1		A2		N	0	N	0	0	A4	A1	A5	A5	A2	A3	A4	A5	A5	A4	A4	A4	A4	A5	A4	A3	A1	A3	A4	A2	A2	A2
415	2015-02-06 13:36:26	3	fr		2015-02-06 13:36:26	2015-02-06 13:33:22	A1	18	d2	d1	d1		A2		Y	14	N	0	30	A5	A1	A5	A5	A1	A5	A5	A5	A5	A5	A5	A5	A5	A5	A5	A5	A1	A5	A5	A5	A3	A1
416	2015-02-06 13:36:18	3	fr		2015-02-06 13:36:18	2015-02-06 13:33:43	A1	23	d1	d1	d1		A2		N	0	N	0	15	A5	A2	A5	A5	A1	A4	A5	A5	A5	A5	A5	A5	A4	A5	A4	A5	A3	A5	A5	A3	A1	A1
418	2015-02-06 13:43:11	3	fr		2015-02-06 13:43:11	2015-02-06 13:38:06	A1	18	d1	d1	d1		A2		Y	4	N	0	7	A4	A2	A3	A4	A5	A2	A4	A5	A5	A3	A3	A2	A1	A4	A1	A4	A4	A5	A3	A4	A2	A2
419	2015-02-06 13:45:49	3	fr		2015-02-06 13:45:49	2015-02-06 13:39:45	A1	18	d1	d1	d1		A2		N	1	N	0	50	A4	A1	A4	A3	A2	A3	A5	A4	A4	A3	A5	A3	A2	A4	A4	A3	A3	A4	A3	A4	A2	A2
421	2015-02-06 13:49:47	3	fr		2015-02-06 13:49:47	2015-02-06 13:43:22	A1	20	d2	d1	d1		A2		N	4	N	0	20	A5	A1	A3	A4	A1	A4	A5	A2	A5	A5	A5	A1	A1	A5	A4	A3	A1	A5	A5	A4	A1	A5
422	2015-02-06 13:48:24	3	fr		2015-02-06 13:48:24	2015-02-06 13:43:37	A1	19	d2	d1	d1		A2		N	0	N	0	15	A5	A1	A5	A5	A1	A4	A3	A5	A5	A5	A4	A5	A3	A5	A4	A3	A2	A5	A5	A5	A1	A2
426	2015-02-06 13:57:58	3	fr		2015-02-06 13:57:58	2015-02-06 13:54:42	A1	20	d2	d1	d1		A2		N	7	N	2	14	A4	A1	A5	A5	A2	A5	A5	A5	A5	A5	A4	A5	A5	A5	A5	A4	A3	A5	A5	A5	A3	A2
427	2015-02-06 14:00:31	3	fr		2015-02-06 14:00:31	2015-02-06 13:56:14	A1	21	d1	d1	d1		A2		N	0	N	0	5	A4	A1	A5	A5	A1	A4	A5	A5	A5	A5	A5	A1	A2	A5	A5	A4	A4	A3	A5	A5	A1	A1
428	2015-02-06 15:21:29	3	fr		2015-02-06 15:21:29	2015-02-06 13:58:45	A1	23	d1	d1	d1		A2		Y	10	N	1	2	A4	A4	A4	A3	A4	A3	A4	A4	A4	A2	A3	A3	A2	A3	A3	A3	A3	A3	A4	A2	A2	A1
429	2015-02-06 14:06:48	3	fr		2015-02-06 14:06:48	2015-02-06 14:00:25	A1	18	d1	d1	d1		A2		N	0	N	10	30	A4	A1	A5	A5	A3	A4	A5	A4	A4	A2	A4	A3	A5	A5	A5	A5	A4	A5	A4	A5	A1	A1
430	2015-02-06 14:06:55	3	fr		2015-02-06 14:06:55	2015-02-06 14:01:05	A1	20	d2	d1	d1		A2		N	0	N	0	5	A4	A2	A4	A5	A2	A4	A4	A4	A4	A4	A3	A4	A3	A4	A5	A4	A1	A4	A4	A4	A2	A1
432	2015-02-06 14:11:33	3	fr		2015-02-06 14:11:33	2015-02-06 14:07:18	A1	23	d2	d1	d1		A2		N	0	N	0	30	A3	A2	A3	A2	A3	A1	A3	A4	A4	A2	A3	A3	A1	A4	A3	A2	A1	A4	A3	A4	A2	A3
433	2015-02-06 14:26:27	3	fr		2015-02-06 14:26:27	2015-02-06 14:08:06	A1	18	d2	d1	d1		A2		N	0	N	2	40	A4	A1	A5	A5	A3	A4	A5	A5	A4	A4	A4	A4	A3	A3	A5	A3	A1	A4	A5	A5	A1	A1
434	2015-02-06 14:12:40	3	fr		2015-02-06 14:12:40	2015-02-06 14:08:38	A1	20	d2	d1	d1		A2		Y	8	N	0	3	A4	A2	A5	A4	A1	A4	A4	A5	A4	A4	A3	A5	A3	A4	A4	A5	A2	A4	A3	A4	A2	A1
435	2015-02-06 14:15:20	3	fr		2015-02-06 14:15:20	2015-02-06 14:08:41	A1	23	d2	d1	d1		A2		N	0	N	0	5	A4	A2	A3	A3	A1	A3	A3	A4	A4	A5	A2	A2	A3	A3	A4	A4	A2	A2	A3	A5	A3	A2
436	2015-02-06 14:13:53	3	fr		2015-02-06 14:13:53	2015-02-06 14:09:26	A1	18	d1	d1	d1		A2		Y	10	N	7	30	A4	A1	A5	A5	A3	A4	A5	A5	A5	A2	A4	A3	A5	A5	A4	A4	A3	A5	A4	A4	A1	A1
438	2015-02-06 14:18:10	3	fr		2015-02-06 14:18:10	2015-02-06 14:11:26	A1	20	d2	d1	d1		A2		N	0	N	0	5	A3	A4	A4	A2	A1	A2	A2	A2	A4	A2	A4	A4	A4	A2	A4	A1	A1	A2	A4	A2	A2	A2
439	2015-02-06 14:19:02	3	fr		2015-02-06 14:19:02	2015-02-06 14:13:59	A1	19	d1	d1	d1		A2		N	0	N	0	14	A3	A2	A3	A4	A4	A2	A2	A4	A3	A2	A2	A2	A2	A2	A4	A3	A1	A4	A3	A3	A3	A3
440	2015-02-06 14:17:18	3	fr		2015-02-06 14:17:18	2015-02-06 14:14:12	A1	20	d1	d1	d1		A2		N	6	N	1	20	A4	A1	A5	A5	A3	A3	A4	A5	A5	A3	A4	A5	A3	A5	A4	A4	A1	A5	A5	A4	A1	A1
441	2015-02-06 14:23:49	3	fr		2015-02-06 14:23:49	2015-02-06 14:14:44	A1	19	d2	d1	d1		A2		N	0	N	0	14	A4	A1	A4	A5	A1	A4	A4	A4	A5	A5	A4	A4	A3	A5	A5	A5	A2	A4	A4	A5	A1	A2
443	2015-02-06 14:21:09	3	fr		2015-02-06 14:21:09	2015-02-06 14:15:22	A1	32	d2	d1	d10			Ukraine	N	0	N	0	5	A4	A4	A4	A5	A1	A4	A4	A5	A5	A5	A2	A4	A2	A4	A4	A4	A2	A4	A4	A4	A4	A3
444	2015-02-06 14:18:01	3	fr		2015-02-06 14:18:01	2015-02-06 14:15:22	A1	20	d1	d1	d1		A2		N	0	N	0	40	A5	A1	A5	A5	A1	A5	A5	A5	A5	A5	A4	A5	A5	A5	A5	A5	A4	A5	A5	A5	A2	A2
445	2015-02-06 15:09:37	3	fr		2015-02-06 15:09:37	2015-02-06 14:17:55	A1	20	d2	d1	d1		A2		N	0	N	0	21	A4	A1	A5	A5	A2	A3	A4	A5	A5	A4	A4	A5	A4	A5	A5	A3	A1	A4	A5	A4	A2	A2
446	2015-02-06 14:22:39	3	fr		2015-02-06 14:22:39	2015-02-06 14:19:12	A1	21	d1	d1	d1		A2		N	0	N	0	21	A3	A3	A4	A4	A5	A3	A3	A5	A5	A1	A2	A5	A1	A5	A4	A2	A1	A5	A5	A3	A2	A3
447	2015-02-06 14:24:20	3	fr		2015-02-06 14:24:20	2015-02-06 14:19:38	A1	20	d2	d1	d1		A2		Y	8	N	0	30	A4	A1	A5	A5	A1	A4	A4	A5	A5	A5	A4	A5	A5	A5	A5	A5	A2	A4	A5	A5	A2	A1
448	2015-02-06 14:23:20	3	fr		2015-02-06 14:23:20	2015-02-06 14:20:30	A1	19	d1	d1	d1		A2		N	0	N	0	6	A5	A2	A5	A4	A5	A5	A5	A5	A4	A1	A5	A5	A3	A5	A4	A5	A3	A5	A5	A4	A4	A3
450	2015-02-06 14:27:59	3	fr		2015-02-06 14:27:59	2015-02-06 14:21:01	A1	23	d1	d1	d1		A2		Y	5	N	0	22	A5	A1	A4	A4	A4	A5	A4	A5	A4	A2	A4	A4	A4	A4	A5	A4	A2	A5	A4	A5	A1	A1
451	2015-02-06 14:29:09	3	fr		2015-02-06 14:29:09	2015-02-06 14:22:41	A1	19	d1	d1	d1		A2		N	0	N	35	35	A3	A1	A5	A5	A1	A5	A4	A5	A5	A5	A4	A5	A5	A5	A5	A4	A3	A5	A5	A5	A2	A1
452	2015-02-06 14:34:03	3	fr		2015-02-06 14:34:03	2015-02-06 14:23:27	A1	23	d1	d1	d1		A2		N	4	N	0	8	A5	A3	A3	A4	A4	A4	A3	A5	A3	A2	A4	A4	A2	A5	A4	A5	A4	A4	A4	A4	A2	A1
454	2015-02-06 14:27:31	3	fr		2015-02-06 14:27:31	2015-02-06 14:24:55	A1	19	d1	d1	d1		A2		N	0	N	10	20	A4	A1	A5	A5	A4	A4	A5	A5	A5	A3	A4	A2	A5	A5	A3	A5	A5	A5	A4	A5	A1	A1
457	2015-02-06 14:32:07	3	fr		2015-02-06 14:32:07	2015-02-06 14:29:14	A1	22	d1	d1	d1		A2		N	2	N	8	60	A4	A1	A4	A4	A3	A3	A4	A4	A4	A3	A4	A1	A4	A4	A3	A2	A2	A1	A4	A4	A2	A2
460	2015-02-06 14:38:53	3	fr		2015-02-06 14:38:53	2015-02-06 14:33:13	A1	18	d1	d1	d1		A2		Y	11	N	3	0.25	A5	A5	A5	A4	A1	A4	A5	A5	A3	A4	A4	A2	A5	A5	A5	A5	A1	A5	A3	A5	A1	A1
461	2015-02-06 14:38:51	3	fr		2015-02-06 14:38:51	2015-02-06 14:34:54	A1	19	d2	d3	d1		A2		N	0	N	1	4	A5	A2	A4	A4	A3	A3	A4	A5	A5	A3	A3	A5	A3	A5	A3	A3	A1	A5	A5	A4	A1	A1
463	2015-02-06 14:43:02	3	fr		2015-02-06 14:43:02	2015-02-06 14:40:00	A1	21	d2	d1	d1		A2		N	0	N	0	1	A4	A3	A5	A5	A1	A2	A4	A4	A4	A4	A4	A4	A3	A4	A3	A4	A1	A4	A4	A3	A3	A4
464	2015-02-06 14:46:16	3	fr		2015-02-06 14:46:16	2015-02-06 14:41:57	A1	25	d1	d1	d6			Algerie	N	0	N	0	3	A5	A3	A4	A3	A5	A4	A4	A4	A4	A1	A4	A3	A4	A5	A2	A4	A2	A3	A4	A4	A4	A2
465	2015-02-06 14:45:47	3	fr		2015-02-06 14:45:47	2015-02-06 14:42:36	A1	20	d2	d1	d1		A2		Y	10	N	1	4	A4	A2	A5	A5	A1	A2	A4	A5	A4	A5	A2	A5	A5	A4	A5	A4	A1	A5	A3	A4	A2	A1
466	2015-02-06 14:51:13	3	fr		2015-02-06 14:51:13	2015-02-06 14:47:31	A1	18	d1	d1	d1		A2		N	5	N	3	10	A4	A1	A4	A5	A3	A4	A5	A5	A5	A3	A5	A3	A4	A5	A5	A5	A2	A3	A5	A5	A1	A1
468	2015-02-06 14:54:47	3	fr		2015-02-06 14:54:47	2015-02-06 14:50:09	A1	19	d2	d1	d1		A2		N	0	N	0	20	A5	A1	A5	A5	A1	A4	A4	A5	A4	A4	A4	A4	A1	A5	A2	A4	A2	A4	A4	A3	A1	A4
469	2015-02-06 14:53:36	3	fr		2015-02-06 14:53:36	2015-02-06 14:50:48	A1	22	d2	d1	d1		A2		N	0	N	0	0	A3	A3	A4	A4	A2	A1	A1	A2	A3	A3	A1	A1	A1	A3	A2	A4	A3	A1	A3	A3	A4	A1
470	2015-02-06 14:57:28	3	fr		2015-02-06 14:57:28	2015-02-06 14:50:52	A1	20	d2	d1	d1		A2		N	3	N	1	2	A4	A2	A3	A5	A1	A4	A4	A3	A2	A4	A2	A1	A5	A3	A5	A4	A1	A1	A2	A5	A1	A3
471	2015-02-06 14:58:55	3	fr		2015-02-06 14:58:55	2015-02-06 14:52:20	A1	21	d2	d1	d1		A2		N	0	N	0	1	A4	A5	A5	A3	A1	A3	A4	A5	A3	A5	A1	A4	A3	A2	A5	A2	A1	A5	A2	A5	A2	A2
472	2015-02-06 15:01:50	3	fr		2015-02-06 15:01:50	2015-02-06 14:53:55	A1	18	d2	d1	d1		A2		N	0	N	0	12	A4	A1	A5	A5	A2	A4	A4	A4	A5	A3	A5	A1	A3	A5	A4	A3	A4	A2	A4	A5	A1	A1
473	2015-02-06 15:01:22	3	fr		2015-02-06 15:01:22	2015-02-06 14:55:19	A1	24	d2	d1	d1		A2		N	1	N	0	2	A4	A1	A4	A5	A1	A4	A3	A5	A4	A3	A3	A5	A3	A5	A4	A4	A1	A4	A4	A4	A1	A1
474	2015-02-06 15:05:07	3	fr		2015-02-06 15:05:07	2015-02-06 14:59:42	A1	22	d2	d1	d1		A2		N	0	N	0	7	A3	A1	A5	A5	A2	A3	A5	A5	A5	A4	A4	A4	A4	A4	A5	A5	A4	A5	A4	A4	A2	A4
477	2015-02-06 15:16:12	3	fr		2015-02-06 15:16:12	2015-02-06 15:02:56	A1	19	d1	d1	d1		A2		N	0	N	0	14	A5	A2	A5	A5	A1	A4	A2	A5	A4	A5	A2	A5	A1	A5	A4	A5	A4	A5	A3	A4	A4	A1
478	2015-02-06 15:06:27	3	fr		2015-02-06 15:06:27	2015-02-06 15:03:10	A1	21	d2	d1	d1		A2		N	0	N	0	6	A5	A2	A3	A3	A1	A5	A4	A3	A3	A5	A1	A3	A2	A3	A2	A3	A2	A3	A3	A5	A2	A1
479	2015-02-06 15:47:02	3	fr		2015-02-06 15:47:02	2015-02-06 15:03:59	A1	19	d2	d2	d1		A2		N	4	N	0	18	A5	A2	A4	A5	A2	A5	A4	A4	A5	A4	A4	A4	A3	A5	A4	A3	A1	A4	A4	A4	A2	A1
481	2015-02-06 15:18:42	3	fr		2015-02-06 15:18:42	2015-02-06 15:08:59	A1	20	d2	d1	d1		A2		N	2	N	0	4	A3	A2	A5	A4	A1	A4	A4	A5	A5	A4	A3	A4	A5	A5	A4	A3	A2	A5	A5	A3	A2	A1
482	2015-02-06 15:15:23	3	fr		2015-02-06 15:15:23	2015-02-06 15:09:47	A1	18	d1	d1	d1		A2		Y	9	N	1	10	A4	A1	A5	A5	A1	A5	A4	A5	A5	A5	A4	A2	A5	A5	A3	A5	A3	A5	A5	A5	A3	A1
485	2015-02-06 15:20:44	3	fr		2015-02-06 15:20:44	2015-02-06 15:16:25	A1	23	d2	d1	d1		A2		N	0	N	0	20	A4	A2	A5	A5	A1	A2	A4	A5	A5	A5	A4	A5	A3	A5	A5	A3	A1	A5	A5	A5	A3	A1
486	2015-02-06 15:28:22	3	fr		2015-02-06 15:28:22	2015-02-06 15:23:27	A1	18	d2	d1	d1		A2		N	0	N	0	5	A3	A2	A4	A5	A2	A4	A2	A5	A4	A4	A5	A3	A2	A4	A4	A5	A1	A4	A4	A5	A2	A4
487	2015-02-06 15:26:52	3	fr		2015-02-06 15:26:52	2015-02-06 15:24:02	A1	26	d1	d1	d1		A2		Y	2	N	0	15	A5	A1	A4	A5	A1	A5	A5	A5	A5	A4	A5	A3	A1	A5	A4	A5	A1	A5	A5	A4	A1	A4
488	2015-02-06 15:30:40	3	fr		2015-02-06 15:30:40	2015-02-06 15:24:44	A1	19	d2	d1	d1		A2		N	0	N	0	8	A4	A2	A5	A5	A1	A4	A5	A5	A5	A5	A5	A5	A4	A5	A5	A4	A3	A5	A4	A5	A2	A1
489	2015-02-06 15:32:16	3	fr		2015-02-06 15:32:16	2015-02-06 15:25:07	A1	19	d2	d1	d1		A2		N	0	N	3	4	A3	A1	A4	A4	A3	A4	A5	A5	A3	A2	A2	A5	A2	A4	A3	A4	A4	A5	A4	A5	A3	A3
490	2015-02-06 15:30:55	3	fr		2015-02-06 15:30:55	2015-02-06 15:26:01	A1	18	d2	d1	d1		A2		N	0	N	0	20	A4	A2	A5	A4	A1	A5	A3	A2	A5	A4	A2	A1	A4	A4	A5	A5	A2	A1	A4	A5	A1	A2
491	2015-02-06 15:31:59	3	fr		2015-02-06 15:31:59	2015-02-06 15:28:09	A1	27	d2	d1	d1		A2		N	4	N	2	40	A4	A1	A5	A5	A1	A5	A4	A5	A4	A5	A3	A5	A5	A5	A5	A4	A2	A5	A5	A5	A1	A1
492	2015-02-06 15:39:05	3	fr		2015-02-06 15:39:05	2015-02-06 15:29:12	A1	25	d2	d1	d10		A2		N	0	N	0	15	A5	A1	A5	A5	A2	A4	A5	A5	A5	A4	A4	A5	A3	A5	A5	A4	A3	A5	A5	A4	A3	A4
494	2015-02-06 15:35:21	3	fr		2015-02-06 15:35:21	2015-02-06 15:31:22	A1	48	d2	d1	d1		A2		N	0	N	0	10	A3	A1	A3	A4	A1	A3	A4	A4	A3	A3	A2	A4	A4	A4	A4	A3	A1	A4	A3	A3	A3	A3
496	2015-02-06 15:37:47	3	fr		2015-02-06 15:37:47	2015-02-06 15:34:01	A1	20	d1	d1	d1		A2		N	0	N	0	15	A4	A1	A4	A5	A2	A4	A4	A5	A5	A5	A3	A2	A2	A5	A3	A4	A3	A3	A5	A5	A2	A1
497	2015-02-06 15:40:52	3	fr		2015-02-06 15:40:52	2015-02-06 15:35:49	A1	21	d1	d1	d1		A2		Y	8	N	0.5	3.5	A4	A1	A4	A4	A1	A3	A3	A5	A5	A5	A4	A3	A3	A4	A5	A5	A3	A3	A4	A5	A1	A2
498	2015-02-06 15:43:58	3	fr		2015-02-06 15:43:58	2015-02-06 15:38:16	A1	18	d2	d1	d1		A2		N	0	N	0	5	A5	A1	A4	A5	A1	A3	A5	A5	A4	A5	A2	A5	A4	A4	A5	A4	A2	A4	A4	A5	A2	A1
499	2015-02-06 15:44:06	3	fr		2015-02-06 15:44:06	2015-02-06 15:38:36	A1	19	d2	d1	d1		A2		N	0	N	0	10	A5	A1	A5	A5	A1	A4	A4	A5	A5	A5	A5	A5	A2	A5	A5	A4	A2	A5	A5	A5	A1	A2
501	2015-02-06 15:49:57	3	fr		2015-02-06 15:49:57	2015-02-06 15:40:57	A1	18	d2	d1		Amharique		Ethiopie	N	0	N	0	15	A4	A1	A5	A5	A2	A4	A4	A5	A5	A4	A3	A5	A3	A5	A3	A3	A1	A1	A5	A4	A2	A2
502	2015-02-06 15:48:50	3	fr		2015-02-06 15:48:50	2015-02-06 15:45:44	A1	22	d1	d1	d1		A2		N	0	N	0	10	A4	A2	A4	A4	A4	A4	A5	A5	A5	A5	A4	A4	A4	A4	A4	A3	A1	A4	A5	A4	A2	A4
503	2015-02-06 15:52:34	3	fr		2015-02-06 15:52:34	2015-02-06 15:45:57	A1	20	d2	d1	d1		A2		Y	6	N	0	20	A5	A1	A3	A5	A2	A4	A4	A3	A4	A4	A4	A1	A2	A4	A4	A4	A4	A4	A4	A5	A2	A3
504	2015-02-06 15:51:37	3	fr		2015-02-06 15:51:37	2015-02-06 15:47:23	A1	20	d2	d1	d1		A2		N	0	N	0	4	A4	A2	A3	A4	A1	A5	A4	A4	A4	A4	A4	A4	A3	A4	A5	A4	A2	A4	A4	A5	A2	A2
506	2015-02-06 15:56:37	3	fr		2015-02-06 15:56:37	2015-02-06 15:52:44	A1	19	d2	d1	d1		A2		N	0	N	0	24	A4	A1	A4	A5	A3	A1	A3	A2	A5	A2	A2	A1	A1	A5	A4	A3	A1	A3	A4	A5	A2	A2
507	2015-02-06 15:57:49	3	fr		2015-02-06 15:57:49	2015-02-06 15:52:54	A1	19	d2	d1	d1		A2		N	4	N	0	10	A4	A1	A5	A5	A2	A3	A5	A5	A5	A5	A5	A3	A5	A5	A5	A5	A3	A4	A5	A5	A2	A1
509	2015-02-06 16:40:36	3	fr		2015-02-06 16:40:36	2015-02-06 15:57:14	A1	36	d2	d1	d1		A2		N	3	N	0	2	A5	A2	A5	A2	A1	A4	A3	A5	A2	A5	A4	A5	A5	A2	A5	A4	A2	A5	A2	A5	A1	A1
511	2015-02-06 16:07:46	3	fr		2015-02-06 16:07:46	2015-02-06 16:01:55	A1	18	d2	d2	d1		A2		Y	7	N	0	10	A2	A1	A5	A4	A1	A4	A3	A4	A2	A3	A3	A2	A3	A4	A4	A3	A1	A2	A2	A3	A1	A1
512	2015-02-06 16:19:21	3	fr		2015-02-06 16:19:21	2015-02-06 16:05:25	A1	19	d2	d1	d1		A2		N	0	N	0	49	A2	A1	A5	A5	A1	A4	A4	A5	A5	A5	A3	A5	A1	A5	A5	A4	A2	A5	A5	A5	A1	A1
513	2015-02-06 16:16:47	3	fr		2015-02-06 16:16:47	2015-02-06 16:11:26	A1	20	d2	d1	d1		A2		N	0	N	0	20	A3	A1	A4	A5	A1	A3	A2	A4	A4	A4	A4	A2	A2	A4	A4	A3	A2	A2	A4	A5	A3	A3
514	2015-02-06 16:18:19	3	fr		2015-02-06 16:18:19	2015-02-06 16:12:26	A1	28	d2	d1	d1		A2		N	5	N	0	7	A2	A1	A5	A4	A2	A1	A2	A5	A4	A4	A2	A5	A3	A3	A5	A4	A2	A4	A2	A4	A2	A2
515	2015-02-06 16:20:07	3	fr		2015-02-06 16:20:07	2015-02-06 16:12:50	A1	19	d2	d1	d1		A2		N	0	N	0	20	A4	A2	A5	A5	A5	A2	A3	A5	A4	A3	A2	A5	A2	A3	A4	A3	A1	A5	A4	A5	A3	A3
519	2015-02-06 16:26:04	3	fr		2015-02-06 16:26:04	2015-02-06 16:22:20	A1	20	d2	d1	d1		A2		N	1	N	0	15	A2	A3	A4	A4	A2	A2	A2	A3	A4	A5	A4	A2	A1	A4	A4	A1	A1	A2	A5	A5	A3	A3
520	2015-02-06 16:26:09	3	fr		2015-02-06 16:26:09	2015-02-06 16:22:44	A1	18	d2	d1	d1		A2		N	2	N	2	3	A5	A1	A5	A5	A1	A5	A4	A4	A4	A4	A3	A5	A5	A5	A4	A5	A4	A5	A5	A5	A5	A2
523	2015-02-06 16:30:40	3	fr		2015-02-06 16:30:40	2015-02-06 16:24:53	A1	25	d1	d1	d1		A2		N	0	N	0	12	A4	A1	A5	A5	A3	A5	A5	A5	A5	A4	A5	A1	A3	A5	A4	A5	A5	A5	A4	A5	A1	A1
524	2015-02-06 16:31:35	3	fr		2015-02-06 16:31:35	2015-02-06 16:28:17	A1	18	d2	d1	d1		A2		Y	3	N	2	4	A3	A1	A4	A4	A1	A3	A3	A4	A5	A5	A4	A5	A2	A4	A5	A3	A3	A5	A5	A5	A1	A4
526	2015-02-06 16:38:09	3	fr		2015-02-06 16:38:09	2015-02-06 16:31:24	A1	23	d2	d1	d1		A2		Y	12	N	1	4	A4	A1	A4	A5	A1	A5	A4	A4	A4	A4	A4	A2	A5	A5	A3	A4	A4	A5	A4	A5	A1	A1
527	2015-02-06 16:35:56	3	fr		2015-02-06 16:35:56	2015-02-06 16:32:09	A1	20	d2	d1	d1		A2		N	0	N	0	10	A5	A2	A5	A5	A1	A3	A1	A5	A5	A5	A5	A5	A1	A5	A5	A1	A1	A1	A5	A5	A1	A2
530	2015-02-06 16:49:51	3	fr		2015-02-06 16:49:51	2015-02-06 16:44:09	A1	24	d2	d1	d6			Algerie	N	0	N	0	14	A3	A1	A5	A5	A4	A3	A2	A3	A5	A5	A3	A4	A1	A5	A3	A3	A1	A5	A5	A5	A1	A3
531	2015-02-06 16:54:51	3	fr		2015-02-06 16:54:51	2015-02-06 16:49:29	A1	19	d2	d1	d4		A2		N	0	N	0	2	A3	A2	A5	A5	A1	A4	A3	A4	A4	A4	A3	A4	A4	A3	A5	A3	A1	A4	A4	A5	A2	A4
532	2015-02-06 16:59:30	3	fr		2015-02-06 16:59:30	2015-02-06 16:52:35	A1	21	d2	d1	d1		A2		N	9	N	5	15	A5	A1	A5	A3	A1	A4	A3	A5	A4	A5	A3	A5	A5	A4	A4	A5	A4	A4	A5	A5	A1	A1
533	2015-02-06 17:01:13	3	fr		2015-02-06 17:01:13	2015-02-06 16:55:00	A1	19	d2	d1	d1		A2		N	0	N	0	35	A4	A1	A3	A5	A1	A3	A5	A3	A5	A5	A5	A1	A4	A5	A5	A4	A3	A3	A5	A5	A5	A1
535	2015-02-06 17:10:05	3	fr		2015-02-06 17:10:05	2015-02-06 17:02:37	A1	21	d2	d1	d1		A2		N	0	N	0	30	A5	A2	A5	A3	A1	A4	A3	A5	A4	A4	A4	A5	A3	A5	A4	A3	A1	A5	A5	A5	A2	A4
536	2015-02-06 17:10:56	3	fr		2015-02-06 17:10:56	2015-02-06 17:06:48	A1	19	d2	d1	d1		A2		Y	7	N	20	30	A5	A1	A5	A5	A2	A5	A5	A5	A5	A4	A4	A5	A5	A5	A5	A5	A4	A5	A5	A5	A1	A1
537	2015-02-06 17:12:46	3	fr		2015-02-06 17:12:46	2015-02-06 17:09:00	A1	18	d1	d1	d1		A2		N	10	N	7	14	A4	A1	A4	A4	A5	A5	A5	A5	A5	A2	A5	A1	A5	A5	A4	A3	A3	A4	A5	A4	A1	A2
539	2015-02-06 17:15:40	3	fr		2015-02-06 17:15:40	2015-02-06 17:11:43	A1	18	d2	d1	d1		A2		N	0	N	0	5	A5	A2	A4	A5	A2	A4	A2	A3	A3	A4	A5	A5	A1	A4	A5	A4	A1	A4	A4	A4	A1	A4
540	2015-02-06 17:15:30	3	fr		2015-02-06 17:15:30	2015-02-06 17:12:30	A1	20	d2	d1	d1		A2		N	0	N	0	7	A4	A2	A4	A4	A3	A3	A2	A5	A5	A2	A4	A4	A1	A4	A2	A4	A2	A3	A4	A2	A2	A3
541	2015-02-06 17:18:03	3	fr		2015-02-06 17:18:03	2015-02-06 17:13:48	A1	18	d1	d1	d1		A2		Y	12	N	3	10	A4	A1	A5	A5	A2	A3	A3	A5	A4	A3	A2	A4	A4	A3	A4	A3	A2	A5	A4	A3	A2	A2
543	2015-02-06 17:23:05	3	fr		2015-02-06 17:23:05	2015-02-06 17:18:02	A1	19	d1	d1	d1		A2		N	4	N	0	4	A4	A3	A5	A4	A2	A3	A3	A3	A4	A4	A3	A2	A2	A4	A4	A3	A1	A4	A4	A3	A2	A3
544	2015-02-06 17:21:38	3	fr		2015-02-06 17:21:38	2015-02-06 17:18:13	A1	22	d2	d1	d1		A2		N	0	N	0	7	A4	A1	A4	A5	A2	A3	A3	A4	A4	A3	A3	A2	A2	A4	A4	A4	A2	A4	A4	A4	A2	A5
545	2015-02-06 17:22:24	3	fr		2015-02-06 17:22:24	2015-02-06 17:18:31	A1	20	d2	d1	d1		A2		N	0	N	0	21	A5	A1	A5	A5	A2	A3	A4	A5	A5	A4	A4	A5	A4	A5	A5	A4	A3	A4	A5	A5	A1	A1
548	2015-02-06 17:42:17	3	fr		2015-02-06 17:42:17	2015-02-06 17:31:55	A1	23	d2	d1	d1		A2		N	0	N	0	2	A4	A4	A3	A5	A1	A3	A3	A5	A4	A4	A2	A4	A4	A5	A5	A4	A1	A4	A4	A5	A1	A1
551	2015-02-06 17:52:59	3	fr		2015-02-06 17:52:59	2015-02-06 17:45:15	A1	20	d2	d1	d1		A2		N	0	N	0	1	A4	A3	A4	A2	A3	A2	A4	A4	A4	A3	A2	A4	A2	A4	A3	A3	A1	A4	A4	A3	A2	A4
552	2015-02-06 17:58:40	3	fr		2015-02-06 17:58:40	2015-02-06 17:53:16	A1	19	d2	d1	d1		A2		Y	8	N	2	24	A4	A1	A5	A5	A2	A4	A3	A5	A4	A3	A4	A5	A4	A4	A5	A4	A3	A4	A5	A4	A2	A1
553	2015-02-06 18:01:15	3	fr		2015-02-06 18:01:15	2015-02-06 17:58:09	A1	19	d1	d1	d1		A2		N	0	N	0	30	A5	A1	A3	A5	A3	A4	A5	A5	A5	A2	A5	A4	A4	A5	A2	A3	A2	A5	A3	A3	A2	A3
554	2015-02-06 18:04:50	3	fr		2015-02-06 18:04:50	2015-02-06 17:59:05	A1	19	d2	d1	d1		A2		N	0	N	1	38	A4	A1	A4	A5	A3	A4	A4	A4	A5	A4	A4	A4	A4	A5	A5	A4	A3	A5	A4	A5	A3	A3
556	2015-02-06 18:21:03	3	fr		2015-02-06 18:21:03	2015-02-06 18:17:38	A1	23	d1	d1	d1		A2		Y	15	N	2	8	A4	A2	A3	A4	A5	A2	A2	A5	A4	A2	A1	A5	A2	A3	A3	A4	A2	A5	A4	A3	A1	A1
559	2015-02-06 18:34:45	3	fr		2015-02-06 18:34:45	2015-02-06 18:29:09	A1	19	d1	d1	d1		A2		N	0	N	0	20	A4	A1	A5	A5	A5	A3	A4	A5	A5	A2	A4	A5	A1	A5	A5	A4	A2	A5	A5	A5	A1	A4
560	2015-02-06 18:37:57	3	fr		2015-02-06 18:37:57	2015-02-06 18:34:03	A1	22	d2	d1	d1			ALGÉRIE	Y	3	N	0	7	A4	A1	A5	A5	A1	A4	A5	A5	A5	A5	A5	A5	A1	A5	A5	A3	A4	A4	A5	A5	A1	A5
562	2015-02-06 18:46:35	3	fr		2015-02-06 18:46:35	2015-02-06 18:42:58	A1	23	d2	d1	d1		A2		Y	7	N	1	5	A4	A1	A4	A4	A1	A4	A4	A5	A3	A3	A4	A3	A5	A4	A5	A5	A1	A4	A3	A5	A2	A1
563	2015-02-06 18:47:31	3	fr		2015-02-06 18:47:31	2015-02-06 18:43:03	A1	21	d2	d3	d11			Vietnam	N	0	N	0	5	A4	A5	A5	A4	A5	A2	A3	A3	A3	A2	A4	A1	A2	A2	A2	A2	A1	A1	A4	A2	A3	A4
564	2015-02-06 19:02:08	3	fr		2015-02-06 19:02:08	2015-02-06 18:55:42	A1	18	d2	d1	d1		A2		N	0	N	0	1	A4	A3	A4	A5	A3	A4	A4	A5	A5	A3	A3	A4	A4	A5	A5	A5	A1	A4	A5	A5	A4	A2
565	2015-02-06 19:10:28	3	fr		2015-02-06 19:10:28	2015-02-06 19:03:46	A1	21	d2	d1	d1		A2		Y	7	N	0	4	A4	A3	A3	A4	A4	A3	A3	A5	A4	A3	A2	A5	A4	A5	A4	A4	A1	A3	A4	A4	A1	A2
567	2015-02-06 19:13:32	3	fr		2015-02-06 19:13:32	2015-02-06 19:10:27	A1	19	d2	d1	d1		A2		N	0	N	0	5	A4	A2	A5	A4	A5	A3	A2	A4	A4	A3	A2	A4	A2	A4	A4	A3	A1	A4	A4	A4	A5	A5
569	2015-02-06 19:24:34	3	fr		2015-02-06 19:24:34	2015-02-06 19:19:48	A1	20	d2	d1	d1			Guadeloupe	N	0	N	0	10	A3	A2	A4	A4	A1	A3	A3	A4	A4	A5	A2	A4	A1	A4	A4	A4	A1	A3	A4	A4	A2	A4
570	2015-02-06 19:27:18	3	fr		2015-02-06 19:27:18	2015-02-06 19:23:18	A1	19	d1	d1	d1		A2		N	0	N	0	3.5	A3	A2	A4	A5	A4	A4	A3	A4	A5	A3	A4	A2	A2	A4	A5	A3	A1	A4	A4	A3	A2	A3
572	2015-02-06 20:38:18	3	fr		2015-02-06 20:38:18	2015-02-06 20:32:03	A1	19	d2	d1	d1		A2		Y	10	N	1	30	A4	A1	A5	A5	A1	A5	A4	A5	A5	A5	A4	A4	A5	A5	A5	A4	A3	A5	A5	A4	A2	A1
573	2015-02-06 20:40:40	3	fr		2015-02-06 20:40:40	2015-02-06 20:37:48	A1	20	d2	d1	d1		A2		N	0	N	0	15	A5	A1	A3	A4	A1	A4	A3	A5	A4	A5	A5	A3	A2	A4	A5	A4	A4	A4	A4	A4	A2	A2
575	2015-02-06 22:40:34	3	fr		2015-02-06 22:40:34	2015-02-06 22:36:59	A1	19	d1	d2	d1		A2		N	0	N	0	30	A5	A1	A4	A4	A2	A5	A5	A4	A5	A4	A5	A2	A4	A4	A4	A5	A4	A5	A4	A4	A2	A3
580	2015-02-07 01:30:01	3	fr		2015-02-07 01:30:01	2015-02-07 01:25:38	A1	22	d2	d1	d1		A2		N	0	N	0	30	A3	A1	A3	A4	A1	A3	A4	A4	A5	A5	A3	A4	A4	A5	A5	A3	A1	A2	A3	A5	A1	A3
582	2015-02-07 02:25:51	3	fr		2015-02-07 02:25:51	2015-02-07 02:14:56	A1	19	d2	d1	d1		A2		Y	12	N	6	20	A4	A1	A5	A4	A2	A4	A4	A5	A4	A4	A4	A3	A4	A4	A5	A3	A2	A2	A4	A3	A1	A1
583	2015-02-07 02:41:42	3	fr		2015-02-07 02:41:42	2015-02-07 02:30:23	A1	18	d2	d1	d1		A2		Y	1	N	1	6	A3	A1	A4	A4	A2	A3	A4	A4	A5	A4	A4	A1	A4	A5	A5	A5	A1	A3	A4	A4	A1	A1
584	2015-02-07 02:36:39	3	fr		2015-02-07 02:36:39	2015-02-07 02:32:33	A1	18	d2	d1	d1		A2		N	4	N	0	1	A4	A2	A5	A5	A3	A3	A3	A5	A4	A5	A4	A5	A3	A5	A4	A3	A2	A4	A5	A5	A4	A3
586	2015-02-07 02:48:28	3	fr		2015-02-07 02:48:28	2015-02-07 02:44:16	A1	23	d1	d1	d1		A2		N	0	N	0	9	A4	A2	A3	A5	A5	A2	A3	A4	A5	A1	A2	A2	A3	A4	A4	A3	A2	A3	A4	A3	A2	A4
587	2015-02-07 02:51:10	3	fr		2015-02-07 02:51:10	2015-02-07 02:47:59	A1	45	d2	d1	d1		A2		Y	2	N	0	0.5	A4	A3	A4	A4	A3	A4	A4	A4	A5	A4	A4	A3	A2	A4	A4	A4	A2	A4	A4	A3	A3	A2
588	2015-02-07 03:04:53	3	fr		2015-02-07 03:04:53	2015-02-07 03:01:43	A1	25	d2	d1	d1			Nouvelle-Calédonie	N	0	N	0	10	A4	A1	A5	A5	A1	A5	A5	A5	A5	A5	A5	A4	A3	A5	A5	A5	A3	A5	A5	A5	A3	A5
589	2015-02-07 03:09:53	3	fr		2015-02-07 03:09:53	2015-02-07 03:06:37	A1	21	d2	d1	d1		A2		Y	10	N	1	10	A5	A1	A5	A5	A4	A4	A4	A5	A5	A4	A4	A5	A5	A5	A5	A5	A4	A5	A5	A5	A2	A1
592	2015-02-07 03:17:07	3	fr		2015-02-07 03:17:07	2015-02-07 03:13:05	A1	20	d1	d1	d1		A2		Y	13	N	4	14	A4	A1	A4	A3	A2	A2	A5	A4	A4	A3	A4	A4	A5	A4	A4	A4	A2	A5	A4	A3	A2	A1
593	2015-02-07 03:29:17	3	fr		2015-02-07 03:29:17	2015-02-07 03:23:34	A1	20	d1	d1	d1		A2		N	0	N	14	7	A4	A1	A5	A5	A1	A5	A3	A5	A5	A4	A2	A3	A5	A5	A5	A5	A4	A5	A5	A5	A1	A1
594	2015-02-07 03:40:27	3	fr		2015-02-07 03:40:27	2015-02-07 03:35:01	A1	21	d1	d1	d1		A2		N	4	N	0	1	A4	A4	A5	A4	A3	A4	A4	A5	A5	A3	A3	A3	A4	A4	A5	A3	A2	A4	A4	A4	A3	A2
595	2015-02-07 03:46:18	3	fr		2015-02-07 03:46:18	2015-02-07 03:43:52	A1	21	d2	d1	d1		A2		Y	14	N	3	10	A4	A2	A5	A5	A2	A4	A4	A4	A5	A4	A3	A4	A5	A5	A5	A4	A2	A4	A4	A4	A2	A1
597	2015-02-07 03:51:25	3	fr		2015-02-07 03:51:25	2015-02-07 03:46:53	A1	18	d2	d1	d1		A2		N	0	N	0	12	A4	A1	A3	A4	A1	A4	A3	A3	A4	A4	A3	A3	A1	A4	A4	A3	A2	A4	A4	A4	A3	A3
599	2015-02-07 03:56:20	3	fr		2015-02-07 03:56:20	2015-02-07 03:52:05	A1	19	d2	d1	d1		A2		N	4	N	0	2	A4	A1	A5	A4	A2	A4	A4	A4	A4	A2	A4	A4	A3	A5	A4	A4	A2	A5	A4	A3	A1	A2
600	2015-02-07 03:58:38	3	fr		2015-02-07 03:58:38	2015-02-07 03:52:37	A1	20	d2	d1	d1		A2		N	4	N	0	3	A4	A3	A4	A3	A3	A4	A4	A5	A5	A4	A4	A5	A2	A4	A4	A4	A3	A5	A4	A3	A3	A2
601	2015-02-07 03:57:38	3	fr		2015-02-07 03:57:38	2015-02-07 03:53:52	A1	18	d1	d1	d1		A2		Y	4	N	1	6	A4	A2	A3	A5	A1	A5	A3	A5	A5	A4	A2	A1	A3	A3	A5	A3	A1	A5	A3	A5	A4	A1
602	2015-02-07 03:58:41	3	fr		2015-02-07 03:58:41	2015-02-07 03:55:09	A1	21	d2	d1	d1		A2		N	3	N	0	24	A3	A2	A3	A4	A2	A3	A4	A4	A4	A4	A3	A2	A4	A3	A4	A3	A2	A4	A4	A4	A4	A2
603	2015-02-07 03:59:26	3	fr		2015-02-07 03:59:26	2015-02-07 03:55:17	A1	24	d2	d1	d1		A2		N	0	N	0	7	A4	A2	A4	A4	A1	A4	A4	A4	A5	A4	A4	A2	A2	A4	A5	A4	A1	A4	A4	A4	A4	A2
604	2015-02-07 04:00:00	3	fr		2015-02-07 04:00:00	2015-02-07 03:55:55	A1	26	d1	d1	d1		A2		N	0	N	0	7	A4	A2	A4	A5	A3	A2	A3	A5	A3	A3	A2	A2	A1	A4	A4	A3	A1	A5	A4	A4	A3	A5
607	2015-02-07 04:03:34	3	fr		2015-02-07 04:03:34	2015-02-07 04:01:12	A1	18	d2	d1	d1		A2		N	5	N	0	3	A4	A2	A5	A5	A2	A4	A4	A5	A4	A4	A4	A5	A1	A4	A5	A5	A2	A5	A5	A5	A3	A4
608	2015-02-07 04:06:06	3	fr		2015-02-07 04:06:06	2015-02-07 04:01:23	A1	20	d1	d1	d1		A2		N	0	N	0	24	A5	A2	A3	A4	A2	A4	A4	A4	A4	A3	A3	A2	A2	A5	A5	A3	A1	A4	A4	A4	A2	A4
609	2015-02-07 04:08:58	3	fr		2015-02-07 04:08:58	2015-02-07 04:03:03	A1	18	d2	d1	d1		A2		N	10	N	3	6	A5	A1	A5	A5	A1	A5	A5	A5	A5	A5	A4	A5	A4	A5	A5	A5	A2	A5	A5	A5	A2	A1
610	2015-02-07 04:11:14	3	fr		2015-02-07 04:11:14	2015-02-07 04:06:10	A1	20	d2	d1	d1		A2		N	0	N	0	10	A5	A1	A5	A5	A2	A4	A5	A5	A5	A4	A5	A5	A4	A4	A5	A4	A4	A5	A5	A4	A1	A1
611	2015-02-07 04:13:00	3	fr		2015-02-07 04:13:00	2015-02-07 04:09:08	A1	24	d2	d1	d1		A2		Y	15	N	2	3	A3	A3	A3	A3	A4	A2	A3	A3	A2	A2	A4	A3	A2	A3	A3	A3	A4	A4	A3	A3	A4	A2
613	2015-02-07 04:14:21	3	fr		2015-02-07 04:14:21	2015-02-07 04:11:20	A1	22	d2	d1	d1		A2		N	0	N	1	5	A4	A2	A4	A4	A2	A4	A4	A3	A4	A3	A3	A2	A4	A4	A4	A4	A2	A2	A4	A4	A2	A2
615	2015-02-07 08:34:46	3	fr		2015-02-07 08:34:46	2015-02-07 04:14:30	A1	19	d2	d1	d1		A2		N	0	N	0	15	A4	A1	A5	A5	A1	A3	A4	A5	A5	A5	A5	A5	A1	A5	A4	A3	A2	A5	A5	A5	A1	A1
616	2015-02-07 04:20:18	3	fr		2015-02-07 04:20:18	2015-02-07 04:15:22	A1	20	d2	d1	d1		A2		Y	12	N	1	11	A4	A1	A4	A5	A1	A4	A5	A5	A5	A5	A5	A4	A5	A5	A5	A4	A1	A5	A5	A5	A1	A1
617	2015-02-07 04:35:59	3	fr		2015-02-07 04:35:59	2015-02-07 04:25:37	A1	21	d2	d1	d1		A2		N	0	N	1	14	A4	A1	A5	A4	A3	A3	A5	A3	A5	A4	A5	A2	A4	A5	A4	A3	A1	A3	A4	A4	A2	A1
620	2015-02-07 04:33:56	3	fr		2015-02-07 04:33:56	2015-02-07 04:30:25	A1	20	d1	d1	d1		A2		N	4	N	0	3	A4	A3	A4	A5	A2	A4	A4	A5	A5	A2	A3	A5	A3	A4	A5	A4	A2	A5	A5	A5	A3	A2
621	2015-02-07 04:37:35	3	fr		2015-02-07 04:37:35	2015-02-07 04:32:01	A1	20	d2	d1	d1		A2		N	0	N	0	20	A4	A1	A5	A5	A1	A3	A4	A5	A5	A5	A2	A5	A5	A5	A5	A5	A1	A5	A5	A5	A1	A1
622	2015-02-07 04:36:58	3	fr		2015-02-07 04:36:58	2015-02-07 04:32:58	A1	23	d2	d1	d1		A2		N	0	N	0	10	A5	A1	A5	A3	A3	A4	A4	A4	A5	A2	A4	A4	A3	A4	A5	A4	A2	A4	A5	A4	A2	A2
623	2015-02-07 04:40:30	3	fr		2015-02-07 04:40:30	2015-02-07 04:37:33	A1	18	d2	d1	d1		A2		N	0	N	0	4	A4	A1	A5	A5	A4	A5	A5	A5	A5	A2	A5	A5	A3	A5	A5	A5	A1	A5	A5	A4	A2	A5
624	2015-02-07 04:41:25	3	fr		2015-02-07 04:41:25	2015-02-07 04:37:33	A1	19	d2	d1	d1		A2		Y	3	N	0	10	A3	A1	A5	A5	A4	A2	A5	A5	A4	A2	A4	A4	A1	A4	A3	A5	A3	A3	A4	A5	A4	A5
625	2015-02-07 04:46:26	3	fr		2015-02-07 04:46:26	2015-02-07 04:40:11	A1	20	d2	d1	d1		A2		N	0	N	2	25	A5	A1	A5	A5	A1	A5	A5	A5	A5	A5	A3	A5	A4	A5	A5	A5	A5	A5	A5	A5	A1	A2
626	2015-02-07 04:46:04	3	fr		2015-02-07 04:46:04	2015-02-07 04:40:24	A1	19	d2	d1	d1		A2		N	0	N	0	20	A4	A1	A4	A5	A1	A3	A4	A5	A4	A5	A3	A4	A4	A4	A5	A3	A2	A4	A4	A5	A2	A2
627	2015-02-07 04:43:17	3	fr		2015-02-07 04:43:17	2015-02-07 04:40:27	A1	19	d1	d1	d1		A2		N	0	N	0	5	A3	A4	A2	A4	A2	A1	A2	A1	A3	A4	A1	A1	A1	A1	A2	A2	A1	A2	A1	A4	A4	A2
628	2015-02-07 04:43:13	3	fr		2015-02-07 04:43:13	2015-02-07 04:40:58	A1	18	d2	d1	d1		A2		N	0	N	0	30	A4	A1	A5	A5	A2	A4	A4	A5	A5	A5	A5	A5	A5	A5	A5	A3	A2	A4	A5	A5	A4	A5
629	2015-02-07 04:45:36	3	fr		2015-02-07 04:45:36	2015-02-07 04:41:45	A1	19	d2	d1	d1		A2		N	4	N	0	30	A4	A1	A4	A5	A1	A4	A4	A5	A3	A5	A4	A4	A4	A4	A5	A4	A3	A4	A5	A5	A3	A3
630	2015-02-07 04:49:19	3	fr		2015-02-07 04:49:19	2015-02-07 04:45:27	A1	24	d2	d1	d1		A2		N	0	N	0	2	A4	A2	A4	A3	A1	A2	A3	A3	A4	A4	A3	A2	A4	A5	A5	A4	A2	A3	A4	A5	A1	A1
631	2015-02-07 04:48:42	3	fr		2015-02-07 04:48:42	2015-02-07 04:46:08	A1	22	d2	d1	d1		A2		Y	6	N	0	5	A4	A3	A5	A4	A3	A3	A4	A5	A5	A4	A2	A4	A2	A4	A4	A5	A1	A2	A2	A2	A2	A1
632	2015-02-07 04:58:22	3	fr		2015-02-07 04:58:22	2015-02-07 04:53:23	A1	26	d2	d1	d7			brésil	N	2	N	0	20	A5	A2	A4	A5	A1	A3	A2	A4	A2	A3	A3	A3	A1	A2	A1	A4	A1	A3	A2	A3	A2	A1
633	2015-02-07 05:00:36	3	fr		2015-02-07 05:00:36	2015-02-07 04:55:58	A1	23	d2	d1	d1		A2		N	0	N	0	0.5	A4	A2	A4	A5	A1	A4	A2	A5	A4	A5	A2	A4	A4	A5	A4	A5	A2	A4	A5	A5	A2	A1
634	2015-02-07 05:00:22	3	fr		2015-02-07 05:00:22	2015-02-07 04:57:49	A1	25	d2	d1	d1		A2		N	0	N	0	4	A4	A4	A4	A4	A2	A3	A3	A5	A4	A3	A2	A5	A3	A4	A5	A5	A3	A5	A4	A4	A1	A1
636	2015-02-07 05:09:58	3	fr		2015-02-07 05:09:58	2015-02-07 05:02:09	A1	23	d2	d1	d1		A2		N	3	N	0	10	A4	A1	A5	A4	A1	A3	A4	A4	A5	A4	A3	A4	A1	A4	A3	A4	A2	A4	A5	A4	A2	A2
637	2015-02-07 05:10:22	3	fr		2015-02-07 05:10:22	2015-02-07 05:05:18	A1	18	d2	d1	d1		A2		N	2	N	0	15	A5	A1	A4	A5	A1	A4	A4	A5	A5	A5	A5	A5	A4	A5	A5	A4	A1	A4	A5	A5	A2	A2
638	2015-02-07 05:11:07	3	fr		2015-02-07 05:11:07	2015-02-07 05:07:01	A1	19	d2	d1	d1		A2		Y	3	N	0	5	A4	A3	A4	A4	A3	A4	A2	A4	A4	A2	A1	A3	A4	A4	A3	A1	A1	A4	A4	A3	A2	A4
639	2015-02-07 05:11:51	3	fr		2015-02-07 05:11:51	2015-02-07 05:08:56	A1	23	d2	d1	d1		A2		N	0	N	0	30	A4	A2	A4	A4	A1	A4	A5	A4	A5	A4	A5	A2	A3	A4	A4	A4	A1	A3	A4	A4	A1	A3
640	2015-02-07 05:18:57	3	fr		2015-02-07 05:18:57	2015-02-07 05:15:21	A1	18	d1	d1	d1		A2		N	0	N	0	15	A4	A1	A2	A2	A1	A2	A4	A3	A3	A5	A5	A1	A2	A4	A4	A5	A2	A4	A3	A5	A1	A4
642	2015-02-07 05:20:39	3	fr		2015-02-07 05:20:39	2015-02-07 05:16:52	A1	20	d1	d1	d3			Colombie	N	0	N	0	28	A4	A1	A4	A2	A1	A4	A4	A3	A5	A4	A4	A1	A3	A4	A4	A3	A3	A2	A4	A4	A1	A3
645	2015-02-07 05:22:35	3	fr		2015-02-07 05:22:35	2015-02-07 05:19:11	A1	21	d2	d2	d1		A2		N	0	N	0	15	A4	A2	A5	A5	A3	A4	A4	A5	A4	A4	A4	A5	A4	A5	A4	A4	A3	A4	A4	A5	A3	A3
646	2015-02-07 05:27:33	3	fr		2015-02-07 05:27:33	2015-02-07 05:25:02	A1	20	d1	d1	d1		A2		N	0	N	0	20	A4	A1	A2	A5	A1	A5	A4	A2	A4	A5	A4	A1	A3	A4	A4	A4	A2	A3	A4	A4	A1	A2
647	2015-02-07 05:33:46	3	fr		2015-02-07 05:33:46	2015-02-07 05:28:21	A1	21	d1	d1	d1		A2		N	0	N	0	35	A4	A1	A5	A4	A4	A4	A5	A5	A5	A2	A3	A3	A2	A5	A4	A3	A4	A4	A4	A5	A3	A1
648	2015-02-07 05:31:15	3	fr		2015-02-07 05:31:15	2015-02-07 05:28:44	A1	18	d1	d1	d11		A2		N	0	N	0	2	A5	A3	A4	A5	A5	A5	A1	A4	A5	A4	A3	A1	A4	A5	A5	A3	A1	A5	A5	A5	A1	A1
650	2015-02-07 05:34:38	3	fr		2015-02-07 05:34:38	2015-02-07 05:31:47	A1	20	d2	d1	d1		A2		N	0	N	0	14	A4	A2	A5	A5	A2	A4	A3	A5	A4	A5	A3	A5	A2	A2	A4	A3	A1	A5	A4	A4	A1	A4
651	2015-02-07 05:36:09	3	fr		2015-02-07 05:36:09	2015-02-07 05:32:12	A1	18	d1	d1	d1		A2		N	0	N	0	9	A4	A1	A4	A5	A3	A4	A2	A4	A5	A2	A4	A4	A2	A5	A4	A3	A3	A5	A5	A4	A2	A3
652	2015-02-07 06:44:45	3	fr		2015-02-07 06:44:45	2015-02-07 05:32:45	A1	22	d2	d1	d1		A2		Y	11	N	0	8	A4	A3	A5	A4	A3	A3	A3	A4	A5	A3	A2	A4	A3	A5	A3	A3	A3	A4	A4	A4	A3	A2
653	2015-02-07 05:41:32	3	fr		2015-02-07 05:41:32	2015-02-07 05:33:02	A1	20	d2	d1	d1		A2		Y	8	N	1	14	A5	A2	A4	A1	A1	A2	A1	A4	A4	A4	A1	A1	A5	A1	A5	A2	A3	A4	A3	A5	A1	A1
654	2015-02-07 05:41:57	3	fr		2015-02-07 05:41:57	2015-02-07 05:34:26	A1	20	d1	d1	d1		A2		N	1	N	0	3	A4	A2	A1	A1	A2	A5	A4	A4	A2	A3	A5	A1	A4	A2	A4	A1	A2	A2	A2	A5	A1	A4
655	2015-02-07 05:42:57	3	fr		2015-02-07 05:42:57	2015-02-07 05:36:49	A1	20	d2	d1	d1		A2		N	0	N	0	0	A3	A4	A4	A3	A4	A3	A1	A3	A4	A3	A1	A1	A1	A4	A4	A3	A1	A4	A3	A4	A2	A1
657	2015-02-07 05:44:02	3	fr		2015-02-07 05:44:02	2015-02-07 05:39:57	A1	22	d2	d1	d1		A2		N	3	N	0	7	A4	A1	A4	A4	A2	A3	A4	A5	A2	A5	A2	A4	A4	A5	A4	A4	A1	A4	A5	A5	A2	A1
661	2015-02-07 05:56:46	3	fr		2015-02-07 05:56:46	2015-02-07 05:51:24	A1	21	d1	d1	d1		A2		N	0	N	0	11	A4	A2	A5	A4	A4	A4	A3	A4	A4	A2	A3	A3	A2	A4	A4	A3	A1	A3	A4	A4	A2	A2
665	2015-02-07 05:57:11	3	fr		2015-02-07 05:57:11	2015-02-07 05:54:40	A1	20	d1	d1	d1		A2		N	0	N	0	5	A3	A1	A5	A4	A2	A3	A4	A4	A5	A3	A4	A2	A3	A5	A4	A3	A1	A2	A4	A4	A2	A1
666	2015-02-07 06:00:13	3	fr		2015-02-07 06:00:13	2015-02-07 05:56:52	A1	19	d2	d3	d1		A2		N	0	N	3	8	A4	A2	A5	A5	A2	A3	A3	A5	A5	A4	A4	A5	A5	A5	A5	A4	A1	A4	A5	A5	A1	A1
667	2015-02-07 06:15:25	3	fr		2015-02-07 06:15:25	2015-02-07 05:56:55	A1	18	d2	d1	d1		A2		Y	12	N	1	8	A5	A1	A5	A5	A1	A5	A5	A5	A5	A5	A1	A5	A5	A5	A5	A5	A1	A5	A5	A5	A1	A2
669	2015-02-07 06:04:45	3	fr		2015-02-07 06:04:45	2015-02-07 06:00:46	A1	20	d1	d1	d1		A2		N	7	N	3	2	A4	A4	A5	A4	A3	A4	A5	A5	A3	A2	A2	A1	A5	A3	A4	A3	A3	A5	A4	A4	A2	A2
670	2015-02-07 06:37:22	3	fr		2015-02-07 06:37:22	2015-02-07 06:04:44	A1	19	d1	d1	d1		A2		N	0	N	0	7	A4	A2	A4	A4	A1	A4	A4	A4	A4	A5	A4	A3	A3	A4	A4	A4	A2	A4	A4	A5	A2	A1
672	2015-02-07 06:16:09	3	fr		2015-02-07 06:16:09	2015-02-07 06:07:58	A1	21	d1	d1	d1		A2		N	0	N	0	10	A4	A1	A3	A4	A3	A4	A4	A4	A5	A4	A5	A4	A1	A5	A4	A3	A2	A2	A4	A4	A2	A4
674	2015-02-07 06:14:08	3	fr		2015-02-07 06:14:08	2015-02-07 06:09:21	A1	22	d2	d1	d1		A2		Y	10	N	0	15	A1	A1	A5	A5	A1	A2	A5	A5	A5	A4	A4	A5	A4	A5	A5	A2	A2	A5	A5	A5	A1	A1
675	2015-02-07 06:21:30	3	fr		2015-02-07 06:21:30	2015-02-07 06:09:27	A1	18	d2	d1	d1		A2		N	0	N	0	10	A3	A2	A3	A5	A1	A2	A4	A4	A5	A4	A4	A4	A1	A4	A2	A2	A1	A5	A5	A2	A3	A4
676	2015-02-07 06:11:49	3	fr		2015-02-07 06:11:49	2015-02-07 06:09:32	A1	25	d2	d1	d1		A2		N	0	N	0	5	A5	A2	A4	A5	A2	A4	A4	A5	A4	A4	A3	A3	A1	A2	A2	A3	A2	A4	A4	A2	A2	A3
677	2015-02-07 06:12:56	3	fr		2015-02-07 06:12:56	2015-02-07 06:10:10	A1	21	d2	d1	d1		A2		Y	11	N	2	15	A5	A2	A5	A4	A1	A4	A4	A5	A4	A4	A4	A5	A5	A4	A5	A5	A3	A5	A4	A5	A2	A2
678	2015-02-07 06:14:00	3	fr		2015-02-07 06:14:00	2015-02-07 06:10:22	A1	20	d1	d1	d1		A2		Y	12	N	2	10	A4	A2	A5	A4	A1	A2	A5	A5	A5	A4	A5	A5	A5	A5	A4	A3	A2	A5	A5	A4	A2	A1
680	2015-02-07 06:25:18	3	fr		2015-02-07 06:25:18	2015-02-07 06:17:45	A1	22	d1	d1	d1		A2		Y	5	N	0	20	A4	A2	A3	A4	A2	A4	A4	A4	A5	A4	A4	A2	A3	A5	A4	A3	A2	A4	A4	A4	A3	A3
683	2015-02-07 06:28:42	3	fr		2015-02-07 06:28:42	2015-02-07 06:25:31	A1	18	d1	d1	d1		A2		N	0	N	4	1	A3	A4	A5	A2	A5	A3	A4	A5	A5	A1	A2	A3	A2	A5	A4	A3	A1	A4	A4	A2	A1	A1
685	2015-02-07 06:32:24	3	fr		2015-02-07 06:32:24	2015-02-07 06:29:11	A1	21	d2	d1	d3			Espagne	N	0	N	0	15	A4	A1	A4	A4	A1	A4	A4	A5	A5	A5	A4	A4	A3	A4	A5	A5	A2	A5	A4	A5	A2	A4
686	2015-02-07 06:38:39	3	fr		2015-02-07 06:38:39	2015-02-07 06:34:32	A1	21	d2	d1	d1		A2		N	5	N	0	7	A4	A2	A4	A4	A1	A4	A5	A5	A3	A5	A3	A5	A1	A4	A5	A4	A3	A4	A4	A5	A1	A1
690	2015-02-07 06:48:08	3	fr		2015-02-07 06:48:08	2015-02-07 06:40:37	A1	18	d2	d1	d1		A2		N	0	N	0	5	A4	A2	A4	A5	A2	A4	A4	A4	A4	A4	A3	A4	A2	A4	A4	A3	A2	A4	A4	A4	A3	A5
691	2015-02-07 06:44:44	3	fr		2015-02-07 06:44:44	2015-02-07 06:40:54	A1	20	d2	d1	d1		A2		N	0	N	0	5	A5	A1	A4	A5	A4	A3	A4	A4	A4	A2	A4	A3	A2	A5	A4	A3	A1	A4	A5	A3	A3	A2
692	2015-02-07 06:49:32	3	fr		2015-02-07 06:49:32	2015-02-07 06:43:28	A1	20	d2	d1	d1		A2		N	0	N	0	28	A4	A2	A5	A5	A1	A3	A2	A5	A4	A5	A4	A5	A1	A4	A5	A4	A1	A5	A4	A5	A2	A1
693	2015-02-07 06:53:28	3	fr		2015-02-07 06:53:28	2015-02-07 06:46:19	A1	19	d1	d1	d1		A2		N	4	N	0	14	A2	A1	A3	A4	A4	A4	A2	A4	A5	A1	A2	A4	A4	A5	A3	A3	A2	A4	A4	A4	A3	A2
694	2015-02-07 06:57:14	3	fr		2015-02-07 06:57:14	2015-02-07 06:49:27	A1	18	d2	d1	d1		A2		N	0	N	0	8	A4	A2	A3	A4	A4	A3	A4	A4	A5	A3	A4	A3	A4	A5	A5	A4	A2	A4	A5	A3	A2	A2
695	2015-02-07 06:59:25	3	fr		2015-02-07 06:59:25	2015-02-07 06:49:37	A1	21	d2	d1	d1		A2		N	7	N	1	35	A4	A1	A5	A5	A2	A3	A2	A5	A5	A4	A5	A5	A5	A5	A5	A3	A2	A5	A5	A5	A1	A1
697	2015-02-07 06:55:48	3	fr		2015-02-07 06:55:48	2015-02-07 06:51:21	A1	19	d1	d1	d1		A2		N	0	N	0	4	A4	A2	A4	A3	A1	A4	A4	A5	A4	A4	A4	A3	A2	A4	A4	A4	A2	A5	A3	A3	A2	A1
699	2015-02-07 07:11:52	3	fr		2015-02-07 07:11:52	2015-02-07 07:08:41	A1	23	d2	d1	d1		A2		N	4	N	0	35	A4	A1	A4	A5	A2	A3	A4	A5	A4	A4	A4	A5	A2	A2	A4	A3	A2	A4	A4	A4	A2	A2
700	2015-02-07 07:17:37	3	fr		2015-02-07 07:17:37	2015-02-07 07:12:32	A1	20	d2	d1	d1		A2		N	3	N	0	0.5	A4	A3	A4	A5	A4	A2	A2	A4	A4	A1	A1	A2	A2	A3	A3	A1	A1	A5	A5	A4	A2	A2
701	2015-02-07 07:15:42	3	fr		2015-02-07 07:15:42	2015-02-07 07:12:44	A1	21	d2	d1	d1		A2		N	0	N	0	3	A4	A2	A5	A5	A4	A4	A2	A5	A4	A2	A2	A4	A3	A4	A4	A4	A1	A5	A4	A4	A4	A4
703	2015-02-07 07:22:03	3	fr		2015-02-07 07:22:03	2015-02-07 07:16:51	A1	19	d2	d1	d1		A2		N	0	N	0	25	A4	A1	A5	A4	A4	A4	A4	A5	A4	A2	A4	A4	A1	A3	A4	A3	A2	A4	A4	A3	A3	A3
707	2015-02-07 07:34:51	3	fr		2015-02-07 07:34:51	2015-02-07 07:29:13	A1	23	d1	d1	d1		A2		N	0	N	0	4	A4	A1	A4	A3	A4	A3	A5	A5	A5	A2	A3	A4	A1	A5	A3	A3	A2	A4	A4	A4	A1	A3
708	2015-02-07 07:41:56	3	fr		2015-02-07 07:41:56	2015-02-07 07:36:31	A1	22	d1	d1	d1		A2		N	0	N	0	21	A5	A1	A3	A4	A4	A4	A5	A4	A5	A2	A4	A2	A1	A4	A4	A3	A1	A4	A4	A4	A1	A1
709	2015-02-07 07:40:44	3	fr		2015-02-07 07:40:44	2015-02-07 07:37:04	A1	18	d2	d1	d1		A2		N	3	N	1	5	A5	A1	A3	A4	A5	A4	A2	A1	A3	A1	A3	A1	A2	A4	A5	A4	A1	A1	A3	A4	A1	A1
711	2015-02-07 07:46:03	3	fr		2015-02-07 07:46:03	2015-02-07 07:41:15	A1	23	d1	d1	d1		A2		N	0	N	0	18	A3	A1	A5	A5	A1	A4	A3	A5	A5	A5	A5	A5	A3	A5	A5	A4	A2	A4	A5	A5	A2	A4
712	2015-02-07 07:46:07	3	fr		2015-02-07 07:46:07	2015-02-07 07:42:07	A1	18	d1	d3	d1		A2		Y	1	N	0	5	A4	A1	A3	A4	A1	A2	A5	A3	A4	A4	A5	A1	A1	A4	A4	A4	A1	A3	A3	A4	A3	A1
713	2015-02-07 07:52:31	3	fr		2015-02-07 07:52:31	2015-02-07 07:42:53	A1	21	d1	d1	d1		A2		Y	4	N	0	3	A4	A3	A5	A3	A4	A2	A4	A4	A3	A2	A3	A2	A3	A4	A2	A4	A1	A2	A5	A4	A2	A1
714	2015-02-07 07:51:12	3	fr		2015-02-07 07:51:12	2015-02-07 07:43:18	A1	23	d1	d1	d1		A2		N	0	N	0	3	A4	A2	A5	A4	A5	A3	A5	A5	A4	A3	A3	A5	A2	A4	A4	A3	A1	A5	A3	A5	A1	A2
715	2015-02-07 07:49:56	3	fr		2015-02-07 07:49:56	2015-02-07 07:45:49	A1	18	d1	d1	d1		A2		N	0	N	0	16	A4	A1	A4	A5	A1	A5	A4	A5	A5	A5	A4	A4	A4	A5	A5	A5	A4	A5	A4	A5	A3	A2
716	2015-02-07 07:53:47	3	fr		2015-02-07 07:53:47	2015-02-07 07:48:53	A1	20	d1	d1	d1		A2		Y	2	N	0	4	A4	A2	A3	A5	A3	A4	A3	A4	A4	A3	A4	A1	A1	A4	A4	A3	A2	A4	A4	A5	A2	A4
718	2015-02-07 08:01:18	3	fr		2015-02-07 08:01:18	2015-02-07 07:57:53	A1	18	d2	d1	d1		A2		Y	10	N	3	6	A5	A2	A4	A4	A1	A5	A4	A4	A5	A5	A3	A2	A5	A4	A3	A4	A2	A3	A4	A4	A2	A2
720	2015-02-07 08:17:32	3	fr		2015-02-07 08:17:32	2015-02-07 08:14:06	A1	22	d2	d1	d1		A2		N	8	N	4	15	A4	A1	A5	A5	A3	A4	A5	A3	A5	A3	A5	A3	A5	A5	A5	A4	A1	A4	A5	A5	A2	A1
721	2015-02-07 08:29:32	3	fr		2015-02-07 08:29:32	2015-02-07 08:25:28	A1	19	d2	d1	d1		A2		N	0	N	0	10	A4	A1	A4	A4	A1	A5	A3	A4	A5	A5	A4	A4	A3	A4	A4	A3	A2	A3	A3	A4	A1	A2
723	2015-02-07 08:30:54	3	fr		2015-02-07 08:30:54	2015-02-07 08:28:11	A1	23	d2	d1	d1		A2		N	0	N	0	10	A4	A1	A5	A5	A2	A4	A5	A5	A5	A2	A4	A5	A4	A5	A5	A3	A3	A5	A5	A5	A2	A4
724	2015-02-07 08:37:49	3	fr		2015-02-07 08:37:49	2015-02-07 08:28:43	A1	20	d1	d1	d1		A2		Y	5	N	1	30	A2	A1	A3	A4	A1	A3	A5	A3	A4	A4	A5	A2	A4	A4	A5	A5	A3	A4	A4	A5	A1	A2
725	2015-02-07 08:46:35	3	fr		2015-02-07 08:46:35	2015-02-07 08:29:01	A1	18	d2	d1	d1		A2		Y	9	N	1	7	A5	A2	A5	A4	A1	A4	A4	A4	A5	A3	A3	A4	A5	A5	A5	A4	A2	A3	A3	A4	A2	A2
726	2015-02-07 08:34:53	3	fr		2015-02-07 08:34:53	2015-02-07 08:29:26	A1	18	d1	d3	d6			Maroc	N	5	N	0	20	A4	A1	A5	A4	A1	A4	A5	A5	A5	A4	A4	A5	A5	A4	A4	A4	A1	A5	A5	A4	A2	A3
727	2015-02-07 08:33:58	3	fr		2015-02-07 08:33:58	2015-02-07 08:30:22	A1	21	d2	d1	d1		A2		N	0	N	0	15	A3	A1	A4	A5	A2	A3	A4	A4	A4	A4	A3	A1	A2	A4	A4	A4	A3	A4	A4	A4	A2	A2
728	2015-02-07 08:34:08	3	fr		2015-02-07 08:34:08	2015-02-07 08:30:41	A1	18	d2	d1	d1		A2		Y	10	N	0	10	A4	A1	A5	A4	A1	A3	A4	A5	A5	A4	A4	A5	A4	A4	A4	A4	A2	A4	A4	A4	A4	A2
729	2015-02-07 08:37:08	3	fr		2015-02-07 08:37:08	2015-02-07 08:31:16	A1	22	d2	d1	d1		A2		N	0	N	0	6	A4	A1	A1	A4	A1	A3	A1	A2	A2	A4	A5	A1	A3	A2	A4	A3	A1	A4	A3	A4	A3	A2
731	2015-02-07 08:38:17	3	fr		2015-02-07 08:38:17	2015-02-07 08:32:20	A1	20	d2	d1	d1		A2		N	0	N	0	25	A4	A1	A5	A5	A1	A5	A4	A5	A5	A5	A4	A5	A5	A5	A5	A5	A2	A5	A5	A5	A3	A1
732	2015-02-07 08:38:08	3	fr		2015-02-07 08:38:08	2015-02-07 08:35:06	A1	19	d2	d1	d1		A2		N	7	N	3	6	A4	A2	A4	A4	A5	A4	A4	A5	A5	A1	A5	A5	A4	A5	A5	A5	A1	A5	A5	A4	A1	A1
733	2015-02-07 08:44:00	3	fr		2015-02-07 08:44:00	2015-02-07 08:37:20	A1	22	d2	d1	d1		A2		N	0	N	0	1	A4	A1	A5	A5	A1	A5	A5	A5	A5	A5	A5	A2	A4	A5	A5	A5	A2	A5	A4	A5	A1	A1
734	2015-02-07 08:41:37	3	fr		2015-02-07 08:41:37	2015-02-07 08:38:15	A1	21	d2	d1	d1		A2		N	2	N	3	20	A5	A1	A5	A5	A1	A4	A5	A5	A5	A5	A5	A5	A5	A5	A5	A4	A2	A4	A5	A5	A2	A1
735	2015-02-07 08:43:06	3	fr		2015-02-07 08:43:06	2015-02-07 08:39:20	A1	21	d2	d1	d1		A2		N	0	N	0	1	A3	A2	A4	A5	A1	A1	A3	A4	A4	A4	A3	A4	A2	A5	A5	A3	A2	A3	A4	A4	A2	A4
736	2015-02-07 08:56:31	3	fr		2015-02-07 08:56:31	2015-02-07 08:42:26	A1	18	d1	d1	d1		A2		N	10	N	1	5	A5	A2	A5	A4	A5	A5	A5	A5	A4	A2	A4	A4	A5	A3	A3	A5	A4	A4	A3	A4	A1	A1
737	2015-02-07 08:47:46	3	fr		2015-02-07 08:47:46	2015-02-07 08:44:21	A1	22	d2	d1	d1		A2		N	1	N	0	24	A4	A1	A4	A1	A1	A4	A5	A5	A5	A5	A5	A5	A3	A5	A5	A4	A5	A5	A5	A5	A1	A2
738	2015-02-07 08:49:47	3	fr		2015-02-07 08:49:47	2015-02-07 08:44:48	A1	20	d2	d1	d1		A2		Y	12	N	2	15	A4	A3	A4	A5	A3	A5	A4	A5	A4	A2	A3	A1	A4	A5	A4	A3	A1	A5	A4	A3	A1	A1
739	2015-02-07 08:55:22	3	fr		2015-02-07 08:55:22	2015-02-07 08:52:03	A1	21	d1	d1	d1		A2		N	0	N	0	35	A4	A1	A5	A5	A1	A4	A3	A5	A5	A5	A4	A5	A5	A5	A5	A4	A2	A5	A5	A5	A1	A1
740	2015-02-07 08:57:19	3	fr		2015-02-07 08:57:19	2015-02-07 08:52:56	A1	18	d1	d1	d13			Réunion	N	0	N	0	7	A2	A1	A2	A2	A3	A3	A4	A5	A3	A4	A5	A1	A3	A4	A4	A5	A1	A4	A3	A3	A3	A4
741	2015-02-07 08:59:15	3	fr		2015-02-07 08:59:15	2015-02-07 08:54:35	A1	22	d1	d1	d1		A2		N	0	N	0	13	A4	A1	A4	A4	A2	A3	A3	A4	A3	A3	A2	A1	A1	A3	A4	A3	A1	A2	A3	A4	A4	A4
742	2015-02-07 08:59:02	3	fr		2015-02-07 08:59:02	2015-02-07 08:55:36	A1	24	d1	d1	d1		A2		N	0	N	0	2	A2	A2	A4	A4	A4	A1	A1	A4	A4	A2	A1	A2	A1	A4	A2	A2	A1	A3	A3	A4	A4	A5
743	2015-02-07 09:04:02	3	fr		2015-02-07 09:04:02	2015-02-07 09:00:07	A1	21	d2	d1	d1		A2		N	0	N	0	6	A1	A4	A4	A5	A1	A1	A4	A5	A5	A5	A3	A4	A1	A5	A4	A4	A1	A4	A4	A5	A3	A1
744	2015-02-07 09:06:57	3	fr		2015-02-07 09:06:57	2015-02-07 09:02:37	A1	26	d2	d1	d1		A2		N	0	N	2	12	A3	A2	A5	A4	A1	A4	A4	A5	A4	A5	A4	A5	A5	A5	A4	A5	A4	A5	A4	A5	A1	A2
745	2015-02-07 09:09:06	3	fr		2015-02-07 09:09:06	2015-02-07 09:04:17	A1	20	d2	d1	d1		A2		N	0	N	0	10	A5	A1	A5	A5	A2	A4	A4	A5	A4	A3	A2	A4	A4	A4	A4	A3	A2	A3	A4	A3	A2	A3
746	2015-02-07 09:19:04	3	fr		2015-02-07 09:19:04	2015-02-07 09:13:40	A1	21	d2	d1	d1		A2		Y	5	N	0	9	A4	A1	A3	A4	A2	A3	A3	A5	A4	A2	A2	A5	A1	A4	A4	A5	A2	A4	A4	A2	A1	A2
747	2015-02-07 09:21:21	3	fr		2015-02-07 09:21:21	2015-02-07 09:16:14	A1	18	d2	d1	d1		A2		N	0	N	0	15	A4	A1	A5	A4	A3	A3	A5	A5	A5	A4	A3	A5	A3	A5	A5	A4	A3	A4	A5	A5	A2	A1
750	2015-02-07 09:28:54	3	fr		2015-02-07 09:28:54	2015-02-07 09:23:43	A1	30	d2	d2	d1		A2		N	0	N	0	0	A1	A1	A4	A5	A1	A1	A2	A5	A5	A5	A5	A5	A5	A5	A5	A5	A2	A4	A4	A5	A2	A5
751	2015-02-07 09:38:49	3	fr		2015-02-07 09:38:49	2015-02-07 09:34:57	A1	20	d2	d1	d1		A2		N	0	N	0	8	A3	A4	A4	A4	A2	A3	A4	A4	A4	A4	A4	A3	A2	A4	A5	A3	A2	A4	A4	A4	A2	A2
752	2015-02-07 10:09:11	3	fr		2015-02-07 10:09:11	2015-02-07 09:36:06	A1	18	d2	d1	d5		A2		N	0	N	0	4	A5	A1	A5	A5	A2	A4	A4	A5	A5	A4	A5	A5	A4	A4	A4	A3	A1	A5	A5	A4	A1	A1
753	2015-02-07 09:39:30	3	fr		2015-02-07 09:39:30	2015-02-07 09:36:37	A1	21	d1	d1	d1		A2		N	0	N	1	10	A4	A1	A3	A4	A1	A4	A4	A4	A5	A4	A4	A4	A3	A5	A4	A4	A4	A4	A4	A4	A2	A3
754	2015-02-07 09:44:59	3	fr		2015-02-07 09:44:59	2015-02-07 09:37:06	A1	20	d2	d1	d1		A2		N	0	N	0	4	A4	A2	A4	A4	A2	A2	A3	A4	A4	A3	A3	A4	A3	A4	A3	A3	A2	A4	A4	A4	A3	A2
755	2015-02-07 09:45:00	3	fr		2015-02-07 09:45:00	2015-02-07 09:39:46	A1	19	d1	d1	d1		A2		N	5	N	3.5	7	A5	A2	A4	A4	A3	A4	A5	A5	A4	A5	A3	A5	A5	A5	A5	A5	A2	A5	A4	A5	A1	A1
756	2015-02-07 09:58:35	3	fr		2015-02-07 09:58:35	2015-02-07 09:53:02	A1	18	d1	d1	d1		A2		N	0	N	0	25	A5	A1	A3	A5	A3	A5	A5	A4	A5	A2	A5	A2	A1	A4	A5	A3	A4	A4	A4	A4	A1	A4
757	2015-02-07 09:59:07	3	fr		2015-02-07 09:59:07	2015-02-07 09:53:09	A1	22	d2	d1	d1		A2		N	0	N	0	4	A5	A1	A5	A5	A1	A4	A4	A5	A5	A5	A4	A5	A5	A5	A5	A4	A3	A5	A5	A5	A2	A2
758	2015-02-07 10:03:32	3	fr		2015-02-07 10:03:32	2015-02-07 09:54:15	A1	22	d2	d1	d1		A2		Y	10	N	4	8	A2	A2	A4	A4	A5	A4	A2	A5	A3	A1	A2	A4	A4	A4	A4	A2	A2	A3	A4	A4	A4	A4
759	2015-02-07 10:01:13	3	fr		2015-02-07 10:01:13	2015-02-07 09:55:36	A1	21	d2	d1		Tamoul	A2		N	0	N	0	3	A4	A1	A5	A5	A1	A3	A3	A5	A3	A5	A5	A5	A2	A5	A5	A5	A2	A5	A4	A5	A1	A1
760	2015-02-07 10:03:39	3	fr		2015-02-07 10:03:39	2015-02-07 09:57:54	A1	19	d2	d1	d1		A2		N	0	N	0	8	A5	A2	A5	A5	A2	A3	A5	A5	A5	A5	A5	A5	A5	A5	A5	A5	A3	A5	A5	A5	A1	A2
762	2015-02-07 10:13:16	3	fr		2015-02-07 10:13:16	2015-02-07 10:10:03	A1	20	d1	d1	d1		A2		N	0	N	0	12	A4	A3	A4	A5	A3	A2	A2	A2	A4	A4	A4	A1	A1	A4	A3	A3	A1	A2	A4	A4	A3	A4
763	2015-02-07 10:15:40	3	fr		2015-02-07 10:15:40	2015-02-07 10:10:18	A1	18	d1	d1	d1		A2		Y	10	N	3	1	A4	A1	A3	A5	A3	A5	A4	A4	A5	A4	A3	A1	A4	A4	A4	A4	A3	A5	A4	A5	A1	A2
764	2015-02-07 10:14:50	3	fr		2015-02-07 10:14:50	2015-02-07 10:11:34	A1	18	d1	d1		Anglais-pere/francais-mere	A2		N	0	N	0	25	A4	A3	A4	A5	A3	A5	A2	A5	A4	A2	A3	A4	A3	A4	A4	A3	A3	A4	A4	A5	A4	A3
765	2015-02-07 10:17:10	3	fr		2015-02-07 10:17:10	2015-02-07 10:13:56	A1	20	d2	d1	d1		A2		Y	11	N	1	5	A4	A2	A5	A5	A1	A4	A3	A5	A5	A5	A2	A5	A2	A4	A5	A4	A2	A5	A4	A2	A1	A1
768	2015-02-07 10:34:01	3	fr		2015-02-07 10:34:01	2015-02-07 10:31:39	A1	21	d1	d1	d1		A2		N	0	N	0	0	A4	A3	A5	A5	A1	A3	A4	A4	A5	A4	A5	A3	A3	A4	A4	A2	A1	A4	A4	A3	A3	A5
769	2015-02-07 10:36:12	3	fr		2015-02-07 10:36:12	2015-02-07 10:32:19	A1	22	d2	d1	d1		A2		N	10	N	1	6	A5	A1	A5	A4	A1	A4	A3	A5	A5	A5	A4	A5	A3	A4	A4	A3	A2	A4	A4	A4	A2	A1
770	2015-02-07 10:41:18	3	fr		2015-02-07 10:41:18	2015-02-07 10:37:00	A1	18	d1	d1	d1		A2		N	10	N	8	12	A4	A2	A4	A5	A2	A4	A2	A3	A5	A2	A3	A1	A5	A5	A5	A5	A2	A5	A4	A5	A1	A1
771	2015-02-07 10:52:46	3	fr		2015-02-07 10:52:46	2015-02-07 10:47:07	A1	18	d1	d1	d1		A2		N	12	N	2	4	A4	A2	A5	A3	A3	A4	A4	A5	A4	A2	A2	A5	A4	A5	A5	A4	A1	A5	A5	A5	A3	A1
773	2015-02-07 11:00:04	3	fr		2015-02-07 11:00:04	2015-02-07 10:56:35	A1	22	d1	d1	d1		A2		N	0	N	0	20	A4	A1	A3	A5	A3	A3	A4	A5	A4	A3	A4	A3	A2	A5	A4	A3	A1	A4	A4	A4	A2	A4
774	2015-02-07 11:04:57	3	fr		2015-02-07 11:04:57	2015-02-07 10:58:44	A1	26	d2	d1	d1		A2		N	0	N	0	10	A4	A2	A4	A4	A1	A3	A4	A5	A4	A4	A2	A4	A1	A3	A5	A4	A1	A5	A3	A5	A1	A2
776	2015-02-07 11:28:55	3	fr		2015-02-07 11:28:55	2015-02-07 11:02:07	A1	18	d1	d1	d1		A2		N	2	N	0	2	A5	A2	A5	A4	A2	A4	A5	A5	A5	A3	A2	A4	A2	A5	A3	A5	A1	A5	A5	A5	A2	A2
777	2015-02-07 11:06:51	3	fr		2015-02-07 11:06:51	2015-02-07 11:02:19	A1	18	d2	d1	d1		A2		Y	7	N	0	6	A5	A2	A4	A5	A2	A4	A3	A5	A5	A4	A4	A2	A3	A4	A5	A4	A1	A5	A4	A5	A2	A1
778	2015-02-07 11:07:39	3	fr		2015-02-07 11:07:39	2015-02-07 11:05:02	A1	27	d1	d1	d1		A2		N	0	N	0	1	A2	A5	A4	A2	A2	A1	A4	A5	A3	A2	A1	A1	A1	A1	A4	A3	A1	A2	A2	A2	A2	A2
781	2015-02-07 11:16:16	3	fr		2015-02-07 11:16:16	2015-02-07 11:13:12	A1	20	d2	d1	d1		A2		N	0	N	0	10	A4	A1	A5	A5	A1	A4	A5	A5	A5	A5	A5	A5	A4	A5	A5	A5	A2	A5	A5	A5	A1	A1
782	2015-02-07 11:17:20	3	fr		2015-02-07 11:17:20	2015-02-07 11:13:31	A1	19	d2	d1	d1		A2		Y	10	N	2	15	A3	A5	A4	A5	A1	A3	A4	A5	A4	A5	A5	A3	A4	A4	A5	A3	A2	A3	A2	A4	A2	A1
783	2015-02-07 11:22:55	3	fr		2015-02-07 11:22:55	2015-02-07 11:13:41	A1	18	d2	d1	d1		A2		N	0	N	0	24	A5	A1	A4	A5	A1	A5	A4	A5	A4	A5	A4	A4	A3	A5	A5	A4	A4	A4	A4	A5	A2	A1
784	2015-02-07 11:20:45	3	fr		2015-02-07 11:20:45	2015-02-07 11:14:51	A1	19	d1	d1	d1		A2		Y	1	N	0	7	A4	A1	A5	A5	A2	A4	A4	A5	A4	A4	A3	A2	A3	A4	A4	A5	A3	A4	A4	A5	A1	A1
785	2015-02-07 12:18:03	3	fr		2015-02-07 12:18:03	2015-02-07 11:19:22	A1	23	d2	d1	d1		A2		N	0	N	0	10	A4	A2	A3	A5	A1	A4	A4	A4	A4	A5	A4	A3	A3	A5	A5	A4	A2	A4	A5	A4	A2	A5
787	2015-02-07 11:29:18	3	fr		2015-02-07 11:29:18	2015-02-07 11:24:43	A1	20	d1	d1	d1		A2		N	0	N	3	25	A5	A1	A5	A5	A2	A5	A5	A4	A4	A4	A5	A3	A4	A4	A5	A5	A3	A5	A4	A5	A1	A3
788	2015-02-07 11:32:39	3	fr		2015-02-07 11:32:39	2015-02-07 11:27:43	A1	20	d2	d1	d4			Italie	Y	4	N	6	14	A4	A1	A5	A5	A5	A2	A4	A5	A5	A1	A4	A5	A4	A3	A4	A4	A3	A5	A5	A4	A2	A2
789	2015-02-07 11:39:48	3	fr		2015-02-07 11:39:48	2015-02-07 11:29:22	A1	22	d2	d1	d1		A2		Y	18	N	14	1	A4	A5	A5	A4	A3	A4	A4	A5	A5	A3	A3	A4	A5	A5	A5	A5	A4	A5	A3	A2	A4	A1
790	2015-02-07 11:36:28	3	fr		2015-02-07 11:36:28	2015-02-07 11:32:55	A1	19	d2	d1	d1		A2		N	2	N	0	10	A4	A2	A5	A5	A1	A4	A2	A3	A4	A4	A4	A1	A3	A4	A4	A5	A1	A5	A5	A4	A4	A4
791	2015-02-07 11:50:37	3	fr		2015-02-07 11:50:37	2015-02-07 11:42:52	A1	21	d2	d1	d8		A2		N	6	N	0	5	A5	A2	A4	A4	A4	A3	A4	A5	A4	A3	A5	A5	A1	A2	A2	A3	A1	A3	A4	A2	A2	A3
793	2015-02-07 11:54:36	3	fr		2015-02-07 11:54:36	2015-02-07 11:48:41	A1	27	d2	d1	d1		A2		Y	9	N	0	20	A4	A1	A5	A5	A1	A4	A4	A5	A3	A5	A4	A2	A4	A5	A4	A5	A3	A5	A4	A5	A1	A1
794	2015-02-07 11:56:59	3	fr		2015-02-07 11:56:59	2015-02-07 11:50:52	A1	18	d1	d1	d1		A2		N	0	N	0	6	A5	A4	A4	A4	A4	A3	A4	A5	A4	A3	A2	A5	A2	A4	A4	A3	A2	A5	A4	A5	A1	A1
795	2015-02-07 12:01:37	3	fr		2015-02-07 12:01:37	2015-02-07 11:51:25	A1	20	d1	d3	d1		A2		Y	14	N	9	35	A3	A1	A5	A5	A1	A4	A2	A5	A5	A1	A5	A4	A4	A5	A2	A3	A1	A5	A5	A5	A1	A1
796	2015-02-07 12:05:35	3	fr		2015-02-07 12:05:35	2015-02-07 11:56:54	A1	18	d2	d1		turc	A2		N	0	N	0	6	A4	A2	A3	A4	A2	A3	A4	A4	A5	A4	A4	A1	A3	A5	A5	A3	A1	A3	A5	A4	A4	A3
798	2015-02-07 12:03:32	3	fr		2015-02-07 12:03:32	2015-02-07 11:59:19	A1	25	d1	d1	d1		A2		Y	1	N	0	20	A4	A1	A4	A5	A2	A5	A5	A4	A5	A3	A4	A2	A3	A4	A5	A3	A4	A4	A5	A5	A2	A2
799	2015-02-07 12:06:38	3	fr		2015-02-07 12:06:38	2015-02-07 12:00:38	A1	22	d1	d1	d1		A2		N	8	N	1	10	A4	A1	A5	A5	A2	A4	A4	A5	A4	A3	A5	A5	A5	A5	A5	A5	A4	A5	A5	A5	A1	A1
800	2015-02-07 12:12:10	3	fr		2015-02-07 12:12:10	2015-02-07 12:05:24	A1	17	d2	d1	d1		A2		Y	9	N	3	13	A2	A1	A4	A5	A2	A4	A5	A5	A4	A3	A3	A4	A4	A4	A4	A5	A1	A4	A4	A4	A1	A1
803	2015-02-07 12:19:50	3	fr		2015-02-07 12:19:50	2015-02-07 12:17:14	A1	20	d1	d1	d1		A2		N	0	N	0	10	A4	A1	A3	A4	A2	A4	A5	A3	A4	A2	A4	A4	A2	A4	A2	A3	A2	A2	A4	A2	A2	A3
805	2015-02-07 12:35:27	3	fr		2015-02-07 12:35:27	2015-02-07 12:24:23	A1	24	d2	d1	d1		A2		Y	0	N	0	1	A2	A3	A5	A3	A1	A5	A5	A5	A5	A5	A3	A5	A2	A3	A5	A3	A1	A5	A5	A5	A1	A3
807	2015-02-07 12:42:04	3	fr		2015-02-07 12:42:04	2015-02-07 12:35:19	A1	24	d2	d1	d1		A2		N	0	N	0	5	A4	A2	A5	A4	A1	A4	A3	A5	A4	A5	A2	A4	A5	A4	A5	A3	A1	A5	A4	A4	A2	A1
808	2015-02-07 12:40:27	3	fr		2015-02-07 12:40:27	2015-02-07 12:35:21	A1	22	d1	d1	d1		A2		N	2	N	0	4	A3	A2	A4	A4	A5	A3	A3	A5	A4	A1	A3	A3	A4	A4	A3	A2	A1	A3	A4	A4	A1	A2
809	2015-02-07 12:41:27	3	fr		2015-02-07 12:41:27	2015-02-07 12:37:13	A1	23	d1	d1	d1		A2		Y	6	N	3	16	A5	A1	A5	A5	A2	A5	A4	A5	A4	A2	A5	A3	A3	A5	A5	A4	A2	A4	A5	A5	A1	A1
810	2015-02-07 12:41:30	3	fr		2015-02-07 12:41:30	2015-02-07 12:37:22	A1	18	d2	d1	d1		A2		N	0	N	0	2	A4	A2	A3	A5	A1	A4	A3	A5	A5	A4	A4	A5	A1	A5	A3	A3	A1	A4	A5	A4	A4	A5
811	2015-02-07 12:48:56	3	fr		2015-02-07 12:48:56	2015-02-07 12:44:00	A1	19	d1	d1	d1		A2		Y	9	N	1	2	A5	A2	A5	A4	A1	A4	A4	A4	A5	A4	A4	A2	A3	A4	A5	A4	A3	A5	A5	A4	A1	A2
812	2015-02-07 12:55:12	3	fr		2015-02-07 12:55:12	2015-02-07 12:46:08	A1	21	d2	d1	d1		A2		Y	0	N	0	5	A4	A3	A5	A4	A2	A3	A5	A4	A3	A3	A2	A4	A2	A4	A5	A4	A1	A4	A3	A4	A2	A2
814	2015-02-07 12:54:16	3	fr		2015-02-07 12:54:16	2015-02-07 12:50:19	A1	20	d2	d1	d1		A2		Y	13	N	2	15	A3	A1	A5	A5	A1	A5	A4	A5	A5	A4	A3	A2	A1	A4	A5	A4	A2	A5	A5	A5	A1	A2
815	2015-02-07 13:01:18	3	fr		2015-02-07 13:01:18	2015-02-07 12:51:57	A1	24	d2	d1	d1		A2		N	4	N	0	5	A4	A3	A3	A5	A1	A4	A1	A5	A4	A4	A3	A2	A3	A4	A5	A3	A1	A3	A3	A5	A3	A2
816	2015-02-07 13:03:08	3	fr		2015-02-07 13:03:08	2015-02-07 12:58:20	A1	19	d1	d1	d1		A2		N	0	N	0	6	A4	A2	A5	A5	A2	A4	A3	A4	A4	A5	A2	A3	A5	A5	A5	A4	A3	A4	A5	A5	A1	A1
818	2015-02-07 13:09:40	3	fr		2015-02-07 13:09:40	2015-02-07 13:06:18	A1	20	d2	d1	d1		A2		N	10	N	15	10	A5	A2	A5	A5	A1	A5	A5	A5	A5	A5	A4	A4	A5	A5	A5	A4	A5	A5	A5	A4	A1	A5
819	2015-02-07 13:10:51	3	fr		2015-02-07 13:10:51	2015-02-07 13:06:28	A1	22	d2	d1	d1		A2		N	0	N	0	4	A4	A4	A5	A2	A1	A1	A4	A3	A3	A4	A3	A1	A3	A4	A2	A3	A1	A1	A4	A3	A1	A2
820	2015-02-07 13:10:31	3	fr		2015-02-07 13:10:31	2015-02-07 13:06:28	A1	20	d1	d1	d1		A2		N	5	N	0	10	A4	A1	A4	A5	A2	A5	A4	A4	A4	A3	A2	A1	A2	A4	A3	A2	A1	A3	A4	A1	A2	A2
821	2015-02-07 13:24:12	3	fr		2015-02-07 13:24:12	2015-02-07 13:18:23	A1	19	d2	d1	d1		A2		N	0	N	0	7	A5	A2	A5	A5	A1	A4	A3	A5	A4	A5	A1	A5	A4	A4	A5	A4	A1	A5	A5	A5	A3	A2
822	2015-02-07 13:25:23	3	fr		2015-02-07 13:25:23	2015-02-07 13:18:51	A1	23	d2	d1	d1		A2		N	0	N	0	60	A5	A1	A5	A5	A3	A4	A5	A4	A5	A2	A4	A5	A2	A5	A2	A3	A2	A5	A5	A3	A2	A1
824	2015-02-07 13:32:46	3	fr		2015-02-07 13:32:46	2015-02-07 13:19:20	A1	18	d2	d1	d1		A2		N	0	N	0	6	A5	A2	A5	A5	A1	A5	A3	A5	A5	A4	A4	A2	A1	A5	A5	A5	A1	A1	A4	A2	A1	A2
826	2015-02-07 13:24:59	3	fr		2015-02-07 13:24:59	2015-02-07 13:21:09	A1	18	d2	d1	d1		A2		Y	12	N	2	4	A4	A2	A4	A4	A4	A4	A4	A5	A5	A2	A4	A4	A5	A5	A5	A4	A3	A4	A4	A5	A2	A2
828	2015-02-07 13:33:29	3	fr		2015-02-07 13:33:29	2015-02-07 13:28:35	A1	52	d2	d2	d6			Algérie	N	0	N	0	2	A4	A5	A5	A3	A5	A2	A1	A5	A2	A1	A1	A5	A3	A2	A5	A2	A1	A5	A2	A5	A1	A4
829	2015-02-07 13:39:30	3	fr		2015-02-07 13:39:30	2015-02-07 13:32:31	A1	20	d2	d1	d1		A2		N	0	N	0	49	A5	A1	A5	A5	A4	A4	A5	A5	A5	A1	A2	A5	A4	A5	A5	A4	A3	A5	A4	A5	A1	A4
830	2015-02-07 13:46:14	3	fr		2015-02-07 13:46:14	2015-02-07 13:43:03	A1	21	d2	d1	d1		A2		N	10	N	0	10	A3	A1	A4	A5	A1	A4	A4	A5	A4	A5	A4	A4	A4	A4	A5	A5	A1	A4	A3	A5	A2	A1
831	2015-02-07 13:47:12	3	fr		2015-02-07 13:47:12	2015-02-07 13:43:39	A1	20	d1	d1	d1		A2		Y	7	N	1	40	A4	A1	A4	A5	A3	A4	A4	A5	A4	A3	A4	A5	A5	A5	A4	A3	A3	A4	A5	A5	A2	A2
832	2015-02-07 13:51:39	3	fr		2015-02-07 13:51:39	2015-02-07 13:46:57	A1	23	d1	d1	d1		A2		N	0	N	1	5	A5	A1	A5	A4	A1	A5	A5	A5	A5	A5	A4	A3	A5	A5	A5	A5	A1	A3	A4	A4	A1	A1
833	2015-02-07 13:55:39	3	fr		2015-02-07 13:55:39	2015-02-07 13:49:55	A1	24	d1	d1	d1		A2		N	0	N	0	2	A4	A2	A4	A4	A5	A3	A3	A5	A4	A1	A2	A4	A1	A4	A3	A4	A1	A5	A4	A3	A4	A3
834	2015-02-07 14:00:49	3	fr		2015-02-07 14:00:49	2015-02-07 13:54:45	A1	20	d2	d1	d1		A2		N	4	N	0	4	A3	A4	A4	A4	A4	A3	A3	A4	A4	A3	A4	A3	A2	A4	A4	A2	A2	A2	A4	A4	A2	A2
836	2015-02-07 14:15:16	3	fr		2015-02-07 14:15:16	2015-02-07 14:07:20	A1	22	d1	d1	d1		A2		Y	16	N	1	1	A4	A2	A5	A4	A5	A4	A4	A5	A5	A1	A4	A4	A4	A4	A2	A4	A4	A5	A4	A3	A2	A1
840	2015-02-07 15:13:13	3	fr		2015-02-07 15:13:13	2015-02-07 15:09:13	A1	20	d2	d1	d1		A2		N	0	N	0	4	A5	A1	A4	A5	A1	A3	A2	A5	A5	A5	A3	A4	A2	A5	A4	A4	A3	A5	A5	A4	A2	A2
841	2015-02-07 15:21:40	3	fr		2015-02-07 15:21:40	2015-02-07 15:16:39	A1	20	d2	d1	d1		A2		N	0	N	0	4	A4	A2	A5	A5	A1	A3	A2	A5	A4	A4	A3	A5	A1	A3	A4	A5	A1	A4	A3	A2	A5	A3
845	2015-02-07 15:30:41	3	fr		2015-02-07 15:30:41	2015-02-07 15:26:08	A1	19	d2	d1	d1		A2		N	0	N	4	2	A4	A1	A5	A5	A1	A4	A3	A4	A5	A4	A4	A3	A5	A5	A5	A3	A2	A4	A4	A5	A2	A1
846	2015-02-07 15:30:00	3	fr		2015-02-07 15:30:00	2015-02-07 15:26:52	A1	18	d2	d1	d1		A2		N	0	N	0	15	A4	A1	A4	A5	A2	A4	A4	A5	A5	A3	A3	A4	A1	A5	A5	A5	A1	A4	A4	A4	A3	A1
847	2015-02-07 15:31:02	3	fr		2015-02-07 15:31:02	2015-02-07 15:28:26	A1	21	d2	d1	d1		A2		Y	15	N	1	3	A4	A1	A5	A5	A1	A4	A3	A4	A4	A5	A2	A2	A4	A4	A5	A5	A2	A5	A4	A5	A2	A1
849	2015-02-07 15:42:31	3	fr		2015-02-07 15:42:31	2015-02-07 15:38:04	A1	19	d1	d1	d1		A2		N	0	N	0	5	A4	A2	A4	A2	A5	A2	A2	A4	A3	A1	A2	A2	A4	A4	A3	A2	A1	A4	A3	A2	A2	A1
850	2015-02-07 15:46:44	3	fr		2015-02-07 15:46:44	2015-02-07 15:39:55	A1	18	d2	d1	d1		A2		N	0	N	0	5	A5	A1	A5	A4	A2	A4	A4	A5	A3	A4	A5	A5	A4	A5	A4	A4	A2	A5	A4	A5	A3	A4
852	2015-02-07 15:58:59	3	fr		2015-02-07 15:58:59	2015-02-07 15:55:29	A1	18	d2	d1	d1		A2		Y	10	N	3	14	A5	A2	A5	A5	A1	A4	A5	A5	A5	A5	A5	A5	A3	A5	A5	A5	A4	A5	A5	A5	A1	A1
853	2015-02-07 16:12:19	3	fr		2015-02-07 16:12:19	2015-02-07 16:01:02	A1	19	d2	d1	d1		A2		Y	10	N	0	24	A4	A1	A5	A5	A1	A5	A5	A5	A5	A5	A4	A5	A5	A5	A5	A4	A1	A5	A5	A5	A1	A1
854	2015-02-07 16:12:38	3	fr		2015-02-07 16:12:38	2015-02-07 16:09:59	A1	23	d2	d1	d1		A2		N	0	N	0	10	A5	A2	A4	A4	A3	A4	A4	A5	A4	A3	A3	A5	A3	A4	A4	A4	A3	A5	A4	A3	A2	A4
855	2015-02-07 16:15:17	3	fr		2015-02-07 16:15:17	2015-02-07 16:12:19	A1	24	d2	d1	d1		A2		N	0	N	0	14	A4	A2	A5	A4	A3	A4	A4	A4	A3	A2	A2	A4	A1	A4	A4	A4	A1	A5	A4	A5	A1	A3
856	2015-02-07 16:25:03	3	fr		2015-02-07 16:25:03	2015-02-07 16:19:35	A1	19	d2	d1	d1		A1		N	0	N	1	6	A4	A2	A4	A3	A1	A3	A2	A5	A5	A4	A2	A5	A3	A4	A3	A3	A1	A5	A3	A5	A2	A4
857	2015-02-07 16:34:45	3	fr		2015-02-07 16:34:45	2015-02-07 16:27:12	A1	18	d1	d1	d1			Gabon	N	0	N	0	10	A3	A2	A4	A4	A2	A3	A4	A4	A4	A4	A3	A2	A3	A4	A4	A3	A1	A4	A4	A4	A2	A2
858	2015-02-07 16:33:55	3	fr		2015-02-07 16:33:55	2015-02-07 16:29:53	A1	19	d1	d1	d1		A2		N	0	N	0	10	A4	A1	A5	A2	A3	A4	A4	A3	A5	A3	A5	A1	A1	A3	A4	A3	A1	A5	A3	A4	A1	A2
859	2015-02-07 17:28:01	3	fr		2015-02-07 17:28:01	2015-02-07 17:21:21	A1	20	d1	d1	d1		A2		N	0	N	0	7	A1	A2	A2	A2	A3	A1	A1	A1	A4	A2	A2	A1	A1	A5	A2	A1	A1	A1	A3	A3	A2	A4
860	2015-02-07 17:37:21	3	fr		2015-02-07 17:37:21	2015-02-07 17:34:39	A1	21	d1	d1	d1		A2		N	0	N	0	7	A3	A2	A4	A5	A1	A3	A4	A4	A4	A4	A3	A2	A3	A5	A2	A4	A1	A4	A4	A3	A2	A2
861	2015-02-07 17:43:25	3	fr		2015-02-07 17:43:25	2015-02-07 17:36:35	A1	18	d2	d1	d1		A2		Y	5	N	0	16	A5	A1	A5	A5	A1	A4	A4	A5	A5	A5	A5	A5	A5	A5	A5	A5	A2	A5	A5	A5	A2	A2
862	2015-02-07 17:41:44	3	fr		2015-02-07 17:41:44	2015-02-07 17:39:35	A1	25	d1	d1	d11		A2		N	2	N	1	5	A4	A4	A4	A4	A4	A4	A4	A4	A4	A4	A4	A4	A4	A4	A4	A4	A4	A4	A4	A4	A4	A4
864	2015-02-07 18:04:14	3	fr		2015-02-07 18:04:14	2015-02-07 18:01:25	A1	26	d2	d1	d1		A2		N	0	N	0	20	A4	A2	A5	A5	A2	A3	A4	A5	A5	A5	A4	A4	A2	A5	A5	A5	A3	A4	A5	A5	A2	A2
865	2015-02-07 18:09:30	3	fr		2015-02-07 18:09:30	2015-02-07 18:02:10	A1	19	d1	d1	d1		A2		N	5	N	0	5	A4	A2	A5	A5	A4	A3	A5	A3	A5	A2	A4	A1	A1	A5	A4	A3	A2	A5	A5	A5	A1	A1
866	2015-02-07 18:14:49	3	fr		2015-02-07 18:14:49	2015-02-07 18:10:24	A1	20	d1	d1	d1		A2		N	0	N	0	2	A3	A2	A4	A5	A5	A3	A4	A4	A5	A1	A2	A1	A1	A4	A2	A4	A1	A4	A4	A2	A3	A3
867	2015-02-07 18:17:56	3	fr		2015-02-07 18:17:56	2015-02-07 18:15:26	A1	20	d2	d1	d1		A2		N	0	N	0	8	A4	A2	A4	A5	A1	A4	A4	A5	A5	A4	A4	A4	A3	A5	A5	A4	A3	A4	A5	A5	A2	A3
868	2015-02-07 18:27:27	3	fr		2015-02-07 18:27:27	2015-02-07 18:22:32	A1	23	d1	d1	d1		A2		N	10	N	1	25	A4	A1	A4	A1	A5	A2	A4	A5	A3	A2	A5	A5	A4	A1	A5	A5	A3	A3	A1	A5	A3	A1
869	2015-02-07 19:00:02	3	fr		2015-02-07 19:00:02	2015-02-07 18:56:37	A1	21	d1	d1	d1		A2		N	0	N	0	2	A4	A1	A4	A4	A5	A3	A4	A5	A5	A1	A4	A2	A4	A4	A4	A3	A2	A4	A3	A4	A3	A1
870	2015-02-07 19:12:52	3	fr		2015-02-07 19:12:52	2015-02-07 19:07:55	A1	18	d2	d1	d1		A2		N	0	N	0	5	A5	A3	A4	A5	A1	A4	A3	A5	A5	A5	A2	A3	A2	A5	A5	A3	A1	A5	A5	A5	A2	A4
871	2015-02-07 19:28:18	3	fr		2015-02-07 19:28:18	2015-02-07 19:25:18	A1	20	d1	d1		Turc	A2		N	0	N	0	8	A4	A1	A5	A5	A4	A4	A5	A5	A5	A3	A5	A5	A5	A4	A5	A5	A4	A5	A3	A4	A1	A1
873	2015-02-07 21:31:04	3	fr		2015-02-07 21:31:04	2015-02-07 21:23:54	A1	20	d2	d1	d1		A2		N	0	N	0	2	A4	A2	A5	A5	A4	A2	A3	A5	A5	A3	A3	A5	A2	A5	A5	A3	A3	A5	A5	A4	A3	A1
874	2015-02-07 21:56:12	3	fr		2015-02-07 21:56:12	2015-02-07 21:52:21	A1	24	d1	d1	d1		A2		N	0	N	0	6	A4	A3	A4	A4	A3	A4	A4	A4	A4	A3	A4	A4	A3	A4	A2	A4	A2	A4	A2	A4	A2	A2
875	2015-02-07 22:16:37	3	fr		2015-02-07 22:16:37	2015-02-07 22:12:10	A1	19	d2	d1	d1		A2		Y	4	N	0	10	A4	A2	A5	A5	A1	A3	A2	A5	A5	A5	A4	A5	A3	A4	A4	A3	A1	A5	A4	A4	A2	A2
876	2015-02-08 02:31:49	3	fr		2015-02-08 02:31:49	2015-02-08 02:27:43	A1	18	d1	d1	d1		A2		N	0	N	0	7	A3	A2	A4	A2	A2	A4	A3	A5	A4	A4	A4	A2	A3	A4	A4	A3	A1	A4	A3	A4	A2	A3
877	2015-02-08 02:36:07	3	fr		2015-02-08 02:36:07	2015-02-08 02:32:49	A1	19	d1	d1	d1		A2		N	0	N	0	20	A3	A2	A4	A4	A2	A4	A3	A4	A5	A5	A5	A4	A3	A3	A3	A4	A2	A3	A3	A3	A2	A2
879	2015-02-08 03:26:56	3	fr		2015-02-08 03:26:56	2015-02-08 03:21:50	A1	22	d2	d1	d1		A2		N	4	N	0	1	A3	A5	A5	A2	A2	A1	A1	A4	A2	A2	A1	A1	A1	A2	A4	A1	A1	A1	A2	A3	A2	A2
880	2015-02-08 03:47:15	3	fr		2015-02-08 03:47:15	2015-02-08 03:40:50	A1	22	d2	d1	d1		A2		N	0	N	1	14	A4	A1	A5	A5	A1	A4	A5	A5	A5	A4	A3	A5	A3	A5	A5	A4	A2	A5	A5	A5	A1	A1
881	2015-02-08 03:50:16	3	fr		2015-02-08 03:50:16	2015-02-08 03:42:28	A1	27	d2	d1	d1		A2		N	0	N	0	4	A3	A2	A5	A5	A1	A5	A4	A5	A4	A4	A4	A4	A1	A4	A5	A3	A1	A4	A3	A5	A2	A1
882	2015-02-08 03:59:18	3	fr		2015-02-08 03:59:18	2015-02-08 03:53:35	A1	31	d1	d3	d1		A2		N	0	N	1	4	A4	A3	A5	A2	A4	A4	A4	A5	A4	A3	A2	A2	A4	A5	A4	A4	A2	A5	A4	A4	A4	A3
883	2015-02-08 04:08:48	3	fr		2015-02-08 04:08:48	2015-02-08 04:01:33	A1	18	d1	d1	d1		A2		Y	4	N	2	20	A3	A2	A4	A4	A2	A4	A2	A4	A5	A3	A4	A2	A5	A5	A5	A3	A3	A2	A4	A4	A1	A1
884	2015-02-08 05:14:53	3	fr		2015-02-08 05:14:53	2015-02-08 04:03:52	A1	18	d2	d1	d1		A2		N	0	N	0	8	A4	A2	A4	A5	A2	A4	A3	A4	A5	A3	A4	A4	A4	A5	A5	A4	A1	A5	A4	A4	A5	A4
885	2015-02-08 04:07:27	3	fr		2015-02-08 04:07:27	2015-02-08 04:04:40	A1	21	d2	d1	d1		A2		N	3	N	0	10	A4	A1	A5	A5	A1	A4	A4	A5	A4	A4	A3	A3	A2	A5	A5	A3	A2	A4	A5	A5	A5	A3
886	2015-02-08 04:18:57	3	fr		2015-02-08 04:18:57	2015-02-08 04:09:59	A1	21	d2	d1	d1		A2		N	0	N	0	10	A4	A1	A5	A5	A1	A3	A2	A5	A4	A4	A1	A2	A3	A5	A5	A3	A2	A4	A5	A2	A2	A3
887	2015-02-08 04:18:19	3	fr		2015-02-08 04:18:19	2015-02-08 04:11:19	A1	20	d2	d1	d1		A2		N	0	N	0	24	A4	A1	A5	A5	A2	A3	A3	A5	A5	A4	A4	A5	A5	A5	A5	A4	A1	A5	A5	A5	A4	A2
888	2015-02-08 04:17:24	3	fr		2015-02-08 04:17:24	2015-02-08 04:14:58	A1	22	d1	d1	d1		A2		N	0	N	0	7	A4	A2	A5	A5	A5	A2	A5	A5	A5	A2	A4	A2	A1	A5	A4	A3	A2	A4	A4	A5	A2	A2
890	2015-02-08 04:27:21	3	fr		2015-02-08 04:27:21	2015-02-08 04:24:46	A1	20	d2	d1	d1		A2		N	0	N	0	15	A3	A2	A5	A4	A2	A3	A4	A5	A4	A4	A3	A4	A2	A4	A4	A4	A2	A4	A4	A3	A3	A2
895	2015-02-08 05:03:57	3	fr		2015-02-08 05:03:57	2015-02-08 04:58:22	A1	20	d2	d1	d1		A2		N	0	N	0	1	A3	A5	A3	A1	A2	A1	A1	A4	A4	A2	A1	A2	A1	A3	A2	A2	A1	A4	A2	A4	A1	A1
898	2015-02-08 05:30:03	3	fr		2015-02-08 05:30:03	2015-02-08 05:25:50	A1	23	d1	d1	d1		A2		Y	2	N	0	10	A4	A2	A4	A4	A1	A3	A4	A3	A4	A4	A4	A2	A2	A4	A4	A4	A2	A3	A4	A5	A1	A1
899	2015-02-08 05:30:22	3	fr		2015-02-08 05:30:22	2015-02-08 05:26:57	A1	21	d1	d1	d1		A2		N	0	N	0	5	A3	A4	A5	A4	A3	A3	A5	A3	A3	A2	A4	A1	A1	A4	A3	A4	A2	A2	A3	A3	A2	A4
901	2015-02-08 05:38:53	3	fr		2015-02-08 05:38:53	2015-02-08 05:33:55	A1	19	d2	d3	d1		A2		N	2	N	2	15	A5	A1	A5	A5	A1	A4	A3	A4	A4	A5	A4	A4	A2	A4	A5	A3	A2	A4	A4	A2	A1	A1
903	2015-02-08 06:00:17	3	fr		2015-02-08 06:00:17	2015-02-08 05:54:49	A1	26	d2	d1	d1		A2		N	10	N	2	4	A4	A4	A4	A4	A1	A5	A4	A5	A4	A3	A2	A4	A5	A4	A4	A5	A4	A5	A3	A5	A2	A1
904	2015-02-08 06:03:23	3	fr		2015-02-08 06:03:23	2015-02-08 05:57:43	A1	18	d1	d1	d1			Madagascar	N	0	N	0	70	A5	A1	A5	A5	A1	A5	A5	A5	A4	A4	A5	A4	A5	A5	A4	A3	A4	A4	A5	A5	A1	A1
905	2015-02-08 06:02:08	3	fr		2015-02-08 06:02:08	2015-02-08 05:58:00	A1	19	d1	d1	d1		A2		N	2	N	0.5	5	A4	A1	A4	A4	A2	A3	A4	A5	A4	A4	A3	A4	A4	A4	A5	A3	A2	A5	A5	A5	A1	A2
906	2015-02-08 06:02:41	3	fr		2015-02-08 06:02:41	2015-02-08 05:59:00	A1	19	d2	d1	d1		A2		N	0	N	0	10	A4	A1	A4	A5	A1	A5	A4	A5	A5	A4	A5	A4	A1	A5	A5	A4	A2	A4	A5	A5	A1	A3
907	2015-02-08 06:07:03	3	fr		2015-02-08 06:07:03	2015-02-08 06:00:16	A1	18	d2	d1	d1		A2		N	0	N	0	2	A4	A4	A4	A4	A2	A3	A1	A4	A4	A4	A2	A4	A1	A4	A5	A3	A1	A4	A4	A5	A4	A4
909	2015-02-08 06:09:16	3	fr		2015-02-08 06:09:16	2015-02-08 06:06:13	A1	19	d2	d1	d1		A2		N	0	N	0	5	A4	A2	A5	A4	A1	A4	A3	A4	A4	A5	A3	A4	A4	A4	A5	A3	A1	A4	A4	A5	A3	A2
910	2015-02-08 06:08:54	3	fr		2015-02-08 06:08:54	2015-02-08 06:06:18	A1	18	d1	d1	d1		A2		Y	5	N	2	5	A4	A2	A4	A4	A2	A4	A4	A4	A4	A4	A4	A4	A4	A4	A4	A4	A3	A4	A4	A4	A2	A2
911	2015-02-08 06:09:16	3	fr		2015-02-08 06:09:16	2015-02-08 06:06:56	A1	23	d2	d1	d1		A2		Y	13	N	15	5	A4	A3	A5	A4	A1	A5	A5	A5	A4	A5	A3	A5	A5	A5	A5	A5	A5	A5	A5	A4	A1	A1
912	2015-02-08 06:16:07	3	fr		2015-02-08 06:16:07	2015-02-08 06:10:42	A1	24	d2	d1	d1		A2		N	1	N	0	3	A5	A1	A5	A4	A1	A5	A4	A5	A3	A5	A3	A5	A2	A5	A3	A3	A4	A5	A5	A5	A2	A2
913	2015-02-08 06:13:30	3	fr		2015-02-08 06:13:30	2015-02-08 06:10:52	A1	21	d1	d1	d1		A2		N	3	N	2	17	A5	A1	A5	A5	A1	A4	A4	A5	A5	A5	A5	A5	A5	A5	A5	A4	A3	A5	A5	A5	A2	A2
914	2015-02-08 06:14:48	3	fr		2015-02-08 06:14:48	2015-02-08 06:10:59	A1	20	d2	d1	d1		A2		N	0	N	1	7	A4	A1	A5	A5	A2	A4	A5	A5	A5	A2	A3	A2	A1	A5	A5	A5	A1	A4	A4	A3	A4	A1
916	2015-02-08 06:21:33	3	fr		2015-02-08 06:21:33	2015-02-08 06:16:24	A1	21	d2	d1	d1		A2		N	0	N	0	14	A3	A4	A5	A5	A5	A3	A4	A5	A4	A2	A3	A2	A2	A4	A4	A5	A3	A5	A5	A5	A2	A3
918	2015-02-08 06:45:20	3	fr		2015-02-08 06:45:20	2015-02-08 06:39:48	A1	24	d2	d1	d1		A2		N	0	N	0	65	A4	A1	A5	A5	A2	A4	A4	A5	A5	A2	A3	A4	A2	A5	A5	A4	A3	A5	A4	A5	A2	A2
919	2015-02-08 06:50:05	3	fr		2015-02-08 06:50:05	2015-02-08 06:45:25	A1	22	d2	d1	d1		A2		N	0	N	0	5	A4	A2	A4	A4	A2	A3	A2	A4	A5	A4	A2	A2	A3	A4	A5	A4	A1	A4	A4	A4	A2	A2
920	2015-02-08 06:58:46	3	fr		2015-02-08 06:58:46	2015-02-08 06:51:34	A1	20	d2	d1	d1		A2		N	4	N	0	10	A2	A1	A5	A4	A1	A2	A4	A5	A5	A5	A4	A5	A2	A4	A5	A4	A1	A5	A4	A4	A2	A1
921	2015-02-08 06:58:31	3	fr		2015-02-08 06:58:31	2015-02-08 06:53:53	A1	29	d2	d1	d1		A2		N	0	N	0	21	A4	A1	A5	A5	A1	A5	A5	A5	A5	A5	A3	A4	A2	A5	A3	A4	A3	A4	A5	A4	A1	A1
922	2015-02-08 07:01:52	3	fr		2015-02-08 07:01:52	2015-02-08 06:57:56	A1	20	d2	d1	d1		A2		N	5	N	2	18	A4	A1	A5	A5	A2	A4	A3	A5	A4	A3	A5	A4	A4	A5	A4	A4	A3	A2	A4	A3	A2	A1
924	2015-02-08 07:13:29	3	fr		2015-02-08 07:13:29	2015-02-08 07:09:59	A1	19	d2	d1	d1		A2		N	0	N	0	6	A3	A2	A4	A4	A2	A4	A4	A4	A3	A3	A4	A4	A2	A5	A4	A4	A2	A4	A4	A4	A3	A3
925	2015-02-08 07:29:51	3	fr		2015-02-08 07:29:51	2015-02-08 07:11:33	A1	18	d1	d1	d1		A2		Y	8	N	4	2	A4	A3	A3	A5	A2	A4	A3	A4	A5	A4	A3	A4	A5	A5	A5	A5	A3	A4	A5	A5	A2	A1
926	2015-02-08 07:23:08	3	fr		2015-02-08 07:23:08	2015-02-08 07:18:07	A1	18	d1	d1	d1		A2		Y	2	N	10	14	A5	A1	A5	A4	A3	A5	A5	A5	A5	A2	A5	A4	A5	A4	A5	A4	A5	A5	A5	A5	A1	A1
927	2015-02-08 07:30:14	3	fr		2015-02-08 07:30:14	2015-02-08 07:24:04	A1	21	d1	d1	d1		A2		N	0	N	0	20	A4	A1	A5	A4	A1	A4	A2	A5	A5	A5	A5	A5	A5	A5	A5	A4	A1	A4	A5	A5	A1	A2
928	2015-02-08 07:29:02	3	fr		2015-02-08 07:29:02	2015-02-08 07:25:27	A1	20	d2	d1	d1		A2		N	0	N	0	4	A4	A1	A5	A4	A1	A3	A4	A5	A4	A4	A3	A1	A3	A4	A5	A5	A1	A4	A3	A5	A2	A2
930	2015-02-08 07:39:32	3	fr		2015-02-08 07:39:32	2015-02-08 07:35:09	A1	19	d2	d1	d1		A2		N	0	N	0	2	A5	A2	A5	A5	A3	A2	A2	A5	A5	A4	A1	A3	A1	A4	A5	A3	A1	A5	A4	A5	A2	A5
931	2015-02-08 07:39:58	3	fr		2015-02-08 07:39:58	2015-02-08 07:35:49	A1	21	d1	d1	d3			Espagne	N	6	N	0	30	A2	A1	A5	A5	A1	A4	A3	A5	A5	A5	A4	A4	A4	A4	A3	A3	A2	A4	A4	A4	A2	A2
932	2015-02-08 07:52:57	3	fr		2015-02-08 07:52:57	2015-02-08 07:40:52	A1	18	d2	d1	d3		A2		N	0	N	2	9	A5	A1	A5	A5	A1	A5	A5	A5	A5	A5	A5	A5	A4	A3	A5	A5	A5	A4	A5	A5	A3	A2
933	2015-02-08 07:45:12	3	fr		2015-02-08 07:45:12	2015-02-08 07:41:44	A1	18	d2	d1	d1		A2		N	0	N	0	6	A4	A2	A5	A5	A4	A4	A2	A4	A4	A3	A4	A4	A1	A5	A2	A2	A1	A4	A4	A3	A3	A4
936	2015-02-08 07:58:29	3	fr		2015-02-08 07:58:29	2015-02-08 07:54:54	A1	22	d1	d1	d1		A2		N	0	N	1	12	A4	A1	A5	A4	A2	A4	A5	A5	A4	A2	A4	A5	A2	A3	A5	A4	A2	A5	A4	A4	A2	A1
937	2015-02-08 07:58:31	3	fr		2015-02-08 07:58:31	2015-02-08 07:54:54	A1	20	d2	d1	d1		A2		Y	4	N	0	9	A5	A1	A5	A4	A1	A5	A3	A5	A5	A5	A3	A5	A5	A5	A5	A4	A1	A5	A5	A5	A2	A1
938	2015-02-08 08:02:46	3	fr		2015-02-08 08:02:46	2015-02-08 07:56:49	A1	25	d1	d1	d1		A2		N	0	N	0	15	A4	A3	A5	A3	A2	A3	A3	A4	A3	A3	A3	A4	A3	A3	A4	A3	A1	A1	A2	A2	A2	A4
939	2015-02-08 08:05:12	3	fr		2015-02-08 08:05:12	2015-02-08 07:59:56	A1	19	d2	d1	d1		A2		N	0	N	0	5	A4	A1	A4	A4	A1	A4	A5	A5	A4	A4	A5	A4	A3	A5	A5	A5	A2	A4	A4	A5	A1	A1
940	2015-02-08 08:10:52	3	fr		2015-02-08 08:10:52	2015-02-08 08:07:57	A1	18	d2	d1	d1		A2		N	4	N	0	5	A3	A2	A4	A4	A1	A3	A2	A4	A4	A4	A4	A3	A1	A4	A4	A3	A1	A4	A4	A4	A2	A2
942	2015-02-08 08:19:07	3	fr		2015-02-08 08:19:07	2015-02-08 08:16:22	A1	24	d2	d1	d1		A2		N	0	N	0	7	A4	A2	A4	A5	A1	A4	A3	A5	A5	A4	A4	A5	A4	A4	A4	A5	A2	A5	A4	A4	A2	A1
943	2015-02-08 08:27:33	3	fr		2015-02-08 08:27:33	2015-02-08 08:18:38	A1	26	d2	d1	d1			Bulgarie	N	0	N	0	5	A3	A1	A5	A3	A1	A4	A3	A5	A5	A4	A4	A4	A3	A5	A5	A3	A1	A4	A4	A4	A2	A2
946	2015-02-08 08:33:07	3	fr		2015-02-08 08:33:07	2015-02-08 08:26:54	A1	18	d1	d1	d6			Egypt	N	2	N	2	20	A4	A1	A4	A5	A1	A4	A4	A4	A4	A5	A4	A4	A5	A3	A5	A5	A3	A5	A4	A5	A3	A3
947	2015-02-08 08:36:47	3	fr		2015-02-08 08:36:47	2015-02-08 08:31:40	A1	20	d2	d1	d1		A2		Y	13	N	2	20	A4	A1	A5	A5	A1	A3	A4	A5	A4	A4	A3	A5	A5	A5	A5	A4	A3	A4	A4	A5	A3	A2
948	2015-02-08 08:39:09	3	fr		2015-02-08 08:39:09	2015-02-08 08:32:00	A1	20	d1	d1	d1		A2		N	0	N	7	10	A4	A1	A5	A5	A4	A5	A5	A5	A5	A2	A5	A3	A5	A5	A5	A4	A4	A5	A4	A5	A1	A2
949	2015-02-08 08:36:56	3	fr		2015-02-08 08:36:56	2015-02-08 08:32:08	A1	19	d2	d1	d1		A2		Y	3	N	2	5	A4	A2	A5	A5	A5	A5	A5	A5	A3	A1	A4	A4	A5	A5	A4	A5	A3	A4	A4	A4	A2	A2
952	2015-02-08 08:48:49	3	fr		2015-02-08 08:48:49	2015-02-08 08:41:25	A1	21	d1	d3	d1		A2		N	0	N	0	8	A4	A1	A4	A5	A3	A4	A4	A4	A5	A4	A4	A1	A2	A5	A5	A3	A2	A5	A4	A5	A1	A2
953	2015-02-08 08:45:42	3	fr		2015-02-08 08:45:42	2015-02-08 08:41:56	A1	18	d2	d1	d1		A2		N	0	N	0	10	A4	A1	A5	A5	A5	A3	A2	A5	A5	A1	A2	A5	A4	A5	A5	A5	A1	A5	A5	A5	A1	A2
954	2015-02-08 08:44:59	3	fr		2015-02-08 08:44:59	2015-02-08 08:42:19	A1	19	d2	d1	d1		A2		N	0	N	0	2	A4	A3	A5	A5	A1	A5	A3	A5	A3	A5	A2	A5	A4	A5	A5	A5	A1	A4	A3	A4	A5	A2
955	2015-02-08 08:59:35	3	fr		2015-02-08 08:59:35	2015-02-08 08:55:20	A1	19	d2	d1	d1		A2		Y	10	N	3	25	A5	A1	A4	A5	A1	A5	A5	A5	A5	A5	A5	A4	A4	A5	A4	A3	A5	A5	A4	A4	A1	A1
957	2015-02-08 09:02:46	3	fr		2015-02-08 09:02:46	2015-02-08 08:58:51	A1	23	d2	d1	d1		A2		N	0	N	0	7	A4	A2	A4	A4	A2	A3	A3	A4	A3	A4	A2	A2	A2	A4	A4	A2	A2	A4	A3	A4	A2	A3
960	2015-02-08 09:12:49	3	fr		2015-02-08 09:12:49	2015-02-08 09:02:50	A1	21	d1	d1	d1		A2		N	0	N	0	10	A2	A1	A3	A5	A5	A4	A4	A5	A5	A1	A2	A4	A2	A5	A4	A4	A1	A5	A5	A4	A2	A2
962	2015-02-08 09:10:44	3	fr		2015-02-08 09:10:44	2015-02-08 09:07:12	A1	21	d2	d1	d1		A2		N	0	N	0	6	A4	A2	A4	A4	A1	A3	A4	A4	A3	A4	A4	A2	A4	A4	A5	A5	A2	A3	A3	A4	A2	A3
963	2015-02-08 09:13:12	3	fr		2015-02-08 09:13:12	2015-02-08 09:07:51	A1	21	d2	d1	d1		A2		N	0	N	1	2	A4	A2	A3	A5	A2	A2	A2	A5	A4	A2	A1	A5	A2	A4	A5	A3	A1	A5	A4	A5	A2	A1
964	2015-02-08 09:14:45	3	fr		2015-02-08 09:14:45	2015-02-08 09:10:03	A1	19	d2	d1	d1		A2		N	0	N	0	14	A3	A1	A5	A4	A1	A4	A4	A5	A4	A4	A4	A3	A1	A4	A4	A4	A1	A5	A5	A4	A2	A2
966	2015-02-08 09:30:33	3	fr		2015-02-08 09:30:33	2015-02-08 09:20:46	A1	21	d2	d1	d11			Vietnam	N	1	N	0	40	A4	A1	A3	A2	A1	A3	A3	A5	A4	A4	A3	A3	A4	A3	A5	A5	A1	A2	A4	A4	A1	A1
967	2015-02-08 09:30:29	3	fr		2015-02-08 09:30:29	2015-02-08 09:26:18	A1	21	d2	d1	d1		A2		N	0	N	0	10	A4	A1	A4	A4	A1	A4	A5	A5	A5	A5	A4	A4	A3	A4	A4	A4	A2	A4	A4	A4	A3	A2
968	2015-02-08 09:32:30	3	fr		2015-02-08 09:32:30	2015-02-08 09:27:15	A1	21	d2	d1	d1		A2		N	0	N	0	6	A3	A1	A4	A5	A5	A4	A2	A4	A4	A1	A3	A2	A1	A4	A4	A3	A2	A4	A4	A4	A2	A2
969	2015-02-08 09:38:13	3	fr		2015-02-08 09:38:13	2015-02-08 09:34:57	A1	19	d1	d1	d1		A2		Y	7	N	0	5	A3	A2	A4	A4	A2	A4	A4	A4	A3	A2	A3	A2	A3	A4	A3	A3	A3	A3	A4	A3	A4	A2
970	2015-02-08 09:45:39	3	fr		2015-02-08 09:45:39	2015-02-08 09:38:43	A1	23	d1	d1		Wolof		Sénégal	N	0	N	0	0	A5	A5	A3	A4	A5	A2	A3	A4	A3	A3	A4	A3	A3	A3	A4	A4	A1	A2	A2	A3	A2	A1
971	2015-02-08 09:43:29	3	fr		2015-02-08 09:43:29	2015-02-08 09:39:47	A1	28	d2	d1	d1		A2		N	0	N	0	10	A5	A1	A5	A5	A1	A4	A4	A5	A4	A4	A3	A5	A2	A4	A4	A4	A2	A5	A5	A5	A4	A4
973	2015-02-08 09:52:05	3	fr		2015-02-08 09:52:05	2015-02-08 09:47:12	A1	21	d2	d1	d1		A2		N	0	N	0	2	A4	A2	A3	A4	A1	A4	A2	A4	A5	A4	A4	A3	A4	A4	A4	A2	A1	A2	A4	A4	A2	A1
974	2015-02-08 09:53:52	3	fr		2015-02-08 09:53:52	2015-02-08 09:49:16	A1	20	d1	d1	d1		A2		Y	10	N	0	10	A4	A1	A4	A4	A1	A4	A4	A5	A4	A5	A4	A5	A4	A4	A5	A4	A3	A5	A4	A5	A2	A2
976	2015-02-08 09:59:57	3	fr		2015-02-08 09:59:57	2015-02-08 09:57:19	A1	23	d2	d1	d1		A2		N	0	N	0	6	A4	A1	A4	A5	A1	A4	A5	A5	A4	A5	A5	A4	A5	A5	A5	A5	A5	A5	A5	A5	A1	A1
977	2015-02-08 10:08:23	3	fr		2015-02-08 10:08:23	2015-02-08 10:01:03	A1	23	d2	d3	d1		A2		N	0	N	0	11	A4	A2	A4	A4	A1	A3	A3	A5	A5	A3	A3	A2	A5	A5	A4	A3	A1	A1	A3	A5	A1	A2
979	2015-02-08 10:14:47	3	fr		2015-02-08 10:14:47	2015-02-08 10:10:50	A1	24	d2	d1	d1			Ile Maurice	N	0	N	0	8	A5	A4	A5	A2	A1	A4	A3	A5	A4	A3	A3	A5	A3	A3	A4	A4	A1	A4	A4	A2	A2	A4
981	2015-02-08 10:19:32	3	fr		2015-02-08 10:19:32	2015-02-08 10:16:56	A1	25	d2	d1	d1		A2		Y	8	N	1	7	A5	A1	A5	A5	A1	A4	A4	A5	A4	A3	A1	A5	A3	A4	A4	A3	A1	A2	A4	A3	A1	A1
982	2015-02-08 10:24:43	3	fr		2015-02-08 10:24:43	2015-02-08 10:19:57	A1	18	d2	d1	d1		A2		N	0	N	0	20	A5	A1	A5	A3	A1	A4	A4	A5	A5	A5	A4	A5	A1	A4	A5	A5	A2	A5	A5	A5	A1	A3
983	2015-02-08 10:29:33	3	fr		2015-02-08 10:29:33	2015-02-08 10:26:15	A1	20	d1	d1	d1		A2		N	0	N	0	2	A4	A2	A5	A4	A2	A2	A2	A3	A2	A2	A2	A2	A2	A3	A4	A3	A1	A4	A3	A4	A2	A4
984	2015-02-08 10:35:32	3	fr		2015-02-08 10:35:32	2015-02-08 10:26:21	A1	19	d2	d1	d1		A2		N	0	N	0	10	A4	A1	A4	A5	A2	A4	A2	A5	A4	A4	A3	A4	A2	A5	A5	A4	A2	A4	A4	A5	A2	A3
985	2015-02-08 10:37:57	3	fr		2015-02-08 10:37:57	2015-02-08 10:34:46	A1	19	d1	d1	d1		A2		N	6	N	0.1	14	A5	A2	A5	A5	A2	A4	A5	A5	A3	A3	A3	A2	A4	A4	A4	A4	A3	A4	A4	A4	A2	A1
986	2015-02-08 10:38:29	3	fr		2015-02-08 10:38:29	2015-02-08 10:35:53	A1	24	d1	d1	d1		A2		N	0	N	0	3	A4	A1	A5	A5	A1	A5	A4	A4	A4	A4	A4	A4	A3	A5	A5	A4	A3	A4	A4	A5	A3	A1
988	2015-02-08 10:44:45	3	fr		2015-02-08 10:44:45	2015-02-08 10:41:00	A1	33	d2	d1	d1		A2		N	0	N	1	3	A4	A4	A4	A5	A1	A4	A5	A5	A4	A5	A2	A5	A4	A3	A4	A3	A2	A4	A4	A5	A2	A2
989	2015-02-08 10:51:31	3	fr		2015-02-08 10:51:31	2015-02-08 10:42:10	A1	19	d2	d1	d1		A2		N	0	N	0	7	A4	A1	A5	A5	A1	A4	A4	A5	A4	A5	A3	A5	A4	A5	A4	A4	A3	A5	A5	A4	A1	A1
991	2015-02-08 10:53:01	3	fr		2015-02-08 10:53:01	2015-02-08 10:48:26	A1	23	d2	d1	d1		A2		N	0	N	0	4	A3	A3	A4	A4	A1	A2	A3	A5	A4	A5	A3	A5	A3	A4	A4	A4	A3	A4	A4	A5	A2	A1
993	2015-02-08 10:59:21	3	fr		2015-02-08 10:59:21	2015-02-08 10:55:46	A1	19	d2	d1	d1		A2		N	0	N	0	20	A4	A1	A5	A5	A1	A5	A5	A5	A5	A5	A5	A5	A3	A5	A4	A5	A4	A5	A5	A5	A1	A2
994	2015-02-08 11:03:11	3	fr		2015-02-08 11:03:11	2015-02-08 10:59:18	A1	21	d2	d1	d1		A2		N	0	N	0	7	A5	A2	A4	A5	A1	A4	A5	A5	A4	A4	A4	A3	A3	A4	A5	A5	A3	A4	A4	A5	A3	A4
996	2015-02-08 11:18:53	3	fr		2015-02-08 11:18:53	2015-02-08 11:11:31	A1	18	d1	d1	d1		A2		N	3	N	0	2	A3	A2	A4	A5	A3	A2	A2	A5	A4	A2	A2	A4	A3	A5	A3	A2	A1	A4	A4	A3	A3	A3
997	2015-02-08 11:22:01	3	fr		2015-02-08 11:22:01	2015-02-08 11:17:03	A1	18	d2	d1	d1		A2		N	0	N	2	10	A4	A1	A5	A5	A1	A3	A4	A5	A4	A5	A3	A5	A4	A4	A5	A4	A2	A5	A4	A5	A3	A2
998	2015-02-08 11:24:44	3	fr		2015-02-08 11:24:44	2015-02-08 11:19:14	A1	18	d2	d1	d1		A2		N	1	N	0	9	A4	A2	A5	A4	A1	A4	A4	A5	A4	A5	A4	A4	A4	A4	A5	A3	A1	A4	A4	A5	A2	A2
999	2015-02-08 11:30:56	3	fr		2015-02-08 11:30:56	2015-02-08 11:19:54	A1	21	d1	d1	d1		A2		N	0	N	0	70	A4	A1	A5	A5	A2	A3	A4	A4	A4	A2	A4	A3	A2	A4	A3	A2	A3	A4	A3	A4	A2	A2
1000	2015-02-08 11:25:27	3	fr		2015-02-08 11:25:27	2015-02-08 11:22:14	A1	20	d1	d2	d1		A2		N	0	N	0	15	A4	A1	A3	A4	A3	A4	A5	A2	A4	A2	A5	A1	A3	A4	A5	A5	A2	A5	A4	A4	A1	A1
1001	2015-02-08 11:29:15	3	fr		2015-02-08 11:29:15	2015-02-08 11:25:47	A1	19	d1	d1	d1		A2		N	4	N	0	15	A4	A1	A5	A5	A4	A3	A4	A4	A5	A4	A3	A1	A1	A5	A4	A3	A1	A5	A5	A4	A4	A4
1004	2015-02-08 11:39:49	3	fr		2015-02-08 11:39:49	2015-02-08 11:33:32	A1	18	d2	d3	d1		A2		Y	12	N	2	14	A4	A2	A4	A5	A2	A4	A5	A3	A5	A4	A5	A1	A4	A5	A5	A3	A3	A4	A4	A5	A3	A1
1005	2015-02-08 11:43:24	3	fr		2015-02-08 11:43:24	2015-02-08 11:38:41	A1	22	d2	d1	d1		A2		N	0	N	0	15	A4	A1	A3	A5	A1	A4	A4	A3	A3	A4	A3	A3	A2	A3	A4	A4	A2	A4	A3	A4	A3	A4
1006	2015-02-08 11:53:00	3	fr		2015-02-08 11:53:00	2015-02-08 11:48:19	A1	21	d2	d1	d1		A2		N	0	N	0	5	A4	A1	A4	A4	A1	A4	A5	A5	A5	A5	A4	A5	A5	A5	A5	A4	A3	A5	A5	A5	A1	A1
1010	2015-02-08 12:10:15	3	fr		2015-02-08 12:10:15	2015-02-08 12:05:47	A1	23	d2	d1		Malgache		Madagascar	N	0	N	0	15	A4	A1	A5	A5	A3	A4	A5	A5	A4	A3	A5	A5	A2	A3	A4	A5	A5	A5	A5	A5	A1	A4
1011	2015-02-08 12:16:40	3	fr		2015-02-08 12:16:40	2015-02-08 12:12:32	A1	19	d2	d1	d1		A2		N	0	N	0	10	A5	A2	A4	A4	A3	A2	A2	A4	A4	A4	A2	A5	A3	A4	A4	A4	A1	A4	A4	A4	A2	A2
1012	2015-02-08 12:25:04	3	fr		2015-02-08 12:25:04	2015-02-08 12:14:26	A1	21	d2	d1	d1		A2		N	0	N	0	2	A4	A2	A4	A5	A2	A4	A4	A4	A4	A4	A3	A4	A2	A4	A4	A4	A3	A4	A4	A4	A5	A4
1015	2015-02-08 12:38:17	3	fr		2015-02-08 12:38:17	2015-02-08 12:28:19	A1	21	d1	d1	d1		A2		Y	13	N	0	5	A4	A1	A4	A4	A3	A5	A4	A5	A5	A2	A4	A5	A5	A3	A4	A5	A4	A5	A3	A4	A1	A1
1016	2015-02-08 12:34:17	3	fr		2015-02-08 12:34:17	2015-02-08 12:28:54	A1	23	d1	d1	d1		A2		N	4	N	0	3	A2	A5	A3	A4	A5	A2	A5	A3	A4	A2	A2	A1	A2	A2	A5	A3	A1	A4	A3	A4	A2	A2
1017	2015-02-08 12:37:19	3	fr		2015-02-08 12:37:19	2015-02-08 12:29:19	A1	19	d2	d3	d3			Colombie	Y	4	N	1	5	A4	A1	A5	A5	A1	A4	A3	A5	A5	A4	A5	A4	A3	A5	A5	A3	A1	A5	A5	A4	A4	A3
1018	2015-02-08 12:36:05	3	fr		2015-02-08 12:36:05	2015-02-08 12:31:55	A1	22	d2	d1	d1		A2		N	0	N	0	15	A2	A1	A4	A5	A1	A3	A3	A5	A5	A5	A4	A4	A3	A5	A5	A4	A2	A3	A3	A5	A2	A2
1020	2015-02-08 12:39:39	3	fr		2015-02-08 12:39:39	2015-02-08 12:33:36	A1	20	d2	d1	d1		A2		Y	8	N	0	1	A4	A4	A5	A5	A2	A4	A3	A4	A5	A4	A1	A2	A3	A4	A5	A3	A1	A5	A4	A5	A2	A2
1021	2015-02-08 12:40:07	3	fr		2015-02-08 12:40:07	2015-02-08 12:36:26	A1	21	d2	d1	d1		A2		N	0	N	2	13	A4	A1	A5	A4	A1	A3	A4	A5	A4	A5	A5	A4	A2	A4	A4	A4	A2	A4	A5	A4	A1	A3
1023	2015-02-08 12:42:10	3	fr		2015-02-08 12:42:10	2015-02-08 12:39:39	A1	44	d2	d1	d1		A2		Y	4	N	3	5	A4	A3	A4	A4	A1	A4	A3	A5	A5	A5	A3	A5	A5	A5	A5	A4	A3	A4	A4	A3	A3	A2
1024	2015-02-08 12:50:59	3	fr		2015-02-08 12:50:59	2015-02-08 12:46:42	A1	18	d2	d1	d1		A2		N	0	N	0	14	A5	A1	A5	A5	A3	A4	A4	A5	A4	A2	A4	A4	A5	A5	A4	A4	A2	A3	A4	A5	A1	A1
1025	2015-02-08 12:53:00	3	fr		2015-02-08 12:53:00	2015-02-08 12:48:05	A1	19	d2	d1	d1		A2		N	0	N	0	2	A4	A1	A4	A5	A1	A1	A4	A5	A4	A4	A3	A3	A1	A4	A5	A3	A1	A5	A4	A4	A2	A1
1026	2015-02-08 12:57:42	3	fr		2015-02-08 12:57:42	2015-02-08 12:54:06	A1	19	d2	d1	d1		A2		N	0	N	0	6	A3	A4	A4	A4	A1	A2	A2	A4	A4	A4	A3	A2	A2	A4	A5	A4	A1	A4	A4	A5	A2	A2
1027	2015-02-08 12:59:18	3	fr		2015-02-08 12:59:18	2015-02-08 12:54:35	A1	23	d2	d1	d1		A2		N	0	N	2	2	A4	A1	A4	A5	A1	A4	A5	A5	A5	A5	A3	A1	A5	A5	A5	A4	A1	A3	A4	A5	A2	A2
1029	2015-02-08 13:17:55	3	fr		2015-02-08 13:17:55	2015-02-08 13:15:15	A1	19	d2	d1	d1		A2		Y	3	N	0	7	A4	A1	A5	A5	A1	A3	A3	A4	A5	A4	A3	A2	A2	A4	A5	A3	A1	A3	A4	A4	A1	A1
1030	2015-02-08 13:25:05	3	fr		2015-02-08 13:25:05	2015-02-08 13:18:49	A1	23	d1	d1	d1			Sénégal	N	0	N	0	12	A4	A4	A5	A3	A4	A4	A4	A4	A3	A2	A4	A1	A1	A3	A5	A3	A2	A4	A4	A4	A1	A2
1031	2015-02-08 13:23:23	3	fr		2015-02-08 13:23:23	2015-02-08 13:19:40	A1	20	d2	d1	d1		A2		N	0	N	0	1	A4	A5	A4	A2	A4	A3	A3	A4	A4	A2	A2	A4	A3	A3	A4	A4	A1	A4	A2	A4	A2	A1
1032	2015-02-08 13:23:44	3	fr		2015-02-08 13:23:44	2015-02-08 13:20:30	A1	23	d2	d1	d1		A2		N	6	N	0	20	A4	A1	A5	A5	A2	A5	A5	A5	A5	A3	A4	A5	A5	A5	A5	A5	A2	A4	A5	A5	A2	A1
1033	2015-02-08 13:28:43	3	fr		2015-02-08 13:28:43	2015-02-08 13:21:36	A1	20	d1	d1		Malgache		Madagascar	N	0.5	N	6	20	A4	A1	A5	A5	A1	A4	A5	A5	A5	A3	A4	A5	A5	A5	A5	A4	A2	A4	A5	A5	A1	A1
1034	2015-02-08 13:26:57	3	fr		2015-02-08 13:26:57	2015-02-08 13:23:12	A1	21	d1	d1	d1		A2		N	5	N	0	25	A4	A1	A3	A3	A4	A4	A5	A3	A5	A1	A3	A2	A1	A5	A5	A2	A1	A4	A4	A4	A1	A1
1035	2015-02-08 13:36:03	3	fr		2015-02-08 13:36:03	2015-02-08 13:33:08	A1	19	d2	d1	d1		A2		N	10	N	1	4	A4	A1	A5	A4	A1	A4	A4	A5	A5	A4	A2	A5	A4	A4	A4	A3	A2	A4	A4	A4	A2	A1
1037	2015-02-08 13:56:35	3	fr		2015-02-08 13:56:35	2015-02-08 13:47:49	A1	20	d2	d1	d1		A2		N	0	N	0	5	A4	A2	A3	A4	A2	A3	A4	A4	A4	A5	A4	A1	A1	A2	A4	A1	A1	A2	A3	A3	A2	A2
1038	2015-02-08 13:59:09	3	fr		2015-02-08 13:59:09	2015-02-08 13:53:28	A1	20	d2	d1	d1		A2		Y	8	N	6	7	A5	A1	A4	A5	A1	A4	A4	A5	A5	A4	A4	A4	A4	A5	A5	A5	A3	A4	A4	A5	A1	A1
1039	2015-02-08 14:03:38	3	fr		2015-02-08 14:03:38	2015-02-08 13:58:10	A1	18	d2	d1	d1		A2		N	2	N	0	30	A4	A1	A4	A5	A2	A3	A3	A4	A5	A4	A4	A4	A4	A5	A4	A4	A1	A4	A5	A5	A3	A2
1040	2015-02-08 14:19:42	3	fr		2015-02-08 14:19:42	2015-02-08 14:01:10	A1	22	d1	d1	d1		A2		N	4	N	0	20	A4	A1	A3	A5	A3	A4	A3	A4	A4	A4	A4	A3	A4	A5	A5	A3	A2	A4	A5	A5	A1	A3
1041	2015-02-08 14:09:18	3	fr		2015-02-08 14:09:18	2015-02-08 14:05:14	A1	18	d1	d1	d1		A2		N	0	N	0	10	A4	A1	A3	A5	A2	A3	A4	A4	A5	A3	A5	A2	A2	A5	A4	A4	A2	A5	A5	A5	A1	A4
1042	2015-02-08 14:11:25	3	fr		2015-02-08 14:11:25	2015-02-08 14:08:02	A1	23	d2	d1	d1		A2		Y	1	N	1	2	A3	A4	A5	A3	A2	A1	A3	A5	A5	A1	A2	A3	A1	A4	A5	A5	A1	A5	A5	A5	A1	A1
1043	2015-02-08 14:20:00	3	fr		2015-02-08 14:20:00	2015-02-08 14:16:24	A1	23	d2	d1	d1		A2		N	0	N	0	5	A4	A2	A5	A5	A1	A3	A3	A4	A4	A5	A3	A4	A4	A4	A5	A3	A1	A4	A4	A4	A3	A3
1044	2015-02-08 14:30:22	3	fr		2015-02-08 14:30:22	2015-02-08 14:18:13	A1	19	d2	d1	d1		A2		N	3.5	N	3	27	A4	A1	A5	A5	A2	A3	A4	A4	A5	A4	A3	A3	A5	A5	A5	A4	A3	A3	A3	A5	A2	A1
1045	2015-02-08 14:27:35	3	fr		2015-02-08 14:27:35	2015-02-08 14:22:57	A1	19	d2	d1	d1		A2		N	1	N	0	8	A4	A1	A5	A5	A1	A4	A3	A5	A5	A5	A5	A5	A3	A5	A5	A4	A3	A4	A5	A5	A2	A2
1046	2015-02-08 14:29:00	3	fr		2015-02-08 14:29:00	2015-02-08 14:26:05	A1	20	d2	d1	d1		A2		N	0	N	0	7	A5	A1	A5	A5	A1	A4	A4	A5	A5	A5	A4	A5	A3	A5	A4	A4	A3	A5	A5	A5	A2	A4
1047	2015-02-08 14:30:54	3	fr		2015-02-08 14:30:54	2015-02-08 14:27:17	A1	24	d1	d1	d1		A2		N	0	N	0	10	A5	A1	A5	A5	A2	A4	A5	A5	A5	A4	A4	A3	A1	A3	A4	A4	A2	A4	A4	A5	A3	A4
1048	2015-02-08 14:31:16	3	fr		2015-02-08 14:31:16	2015-02-08 14:28:06	A1	21	d1	d1	d1		A2		N	0	N	0	21	A5	A1	A4	A5	A1	A5	A5	A5	A5	A5	A5	A2	A2	A4	A4	A5	A4	A5	A4	A4	A1	A4
1049	2015-02-08 14:43:27	3	fr		2015-02-08 14:43:27	2015-02-08 14:30:36	A1	22	d2	d1	d1		A2		N	0	N	0	11	A5	A2	A4	A5	A2	A2	A4	A5	A4	A3	A5	A3	A3	A5	A4	A3	A1	A5	A5	A2	A2	A2
1050	2015-02-08 14:39:35	3	fr		2015-02-08 14:39:35	2015-02-08 14:36:04	A1	20	d2	d1	d1		A2		N	1	N	0	7	A4	A1	A5	A4	A3	A4	A5	A5	A5	A3	A5	A5	A4	A4	A5	A4	A3	A5	A5	A4	A1	A1
1051	2015-02-08 14:42:18	3	fr		2015-02-08 14:42:18	2015-02-08 14:36:41	A1	19	d2	d1	d1		A2		N	4	N	0	1	A3	A4	A4	A4	A1	A1	A1	A2	A1	A4	A3	A1	A1	A1	A5	A1	A1	A1	A1	A5	A1	A4
1052	2015-02-08 14:44:29	3	fr		2015-02-08 14:44:29	2015-02-08 14:40:13	A1	20	d1	d1	d1		A2		N	0	N	6	8	A5	A2	A4	A5	A1	A5	A5	A4	A5	A3	A4	A4	A4	A5	A5	A5	A3	A5	A4	A4	A1	A1
1054	2015-02-08 14:51:33	3	fr		2015-02-08 14:51:33	2015-02-08 14:47:03	A1	35	d2	d1	d1		A2		N	0	N	0	7	A3	A1	A5	A4	A3	A2	A4	A5	A4	A2	A1	A5	A4	A4	A5	A4	A1	A4	A4	A5	A3	A2
1055	2015-02-08 14:55:02	3	fr		2015-02-08 14:55:02	2015-02-08 14:52:13	A1	22	d1	d1	d1		A2		N	5	N	0	20	A4	A1	A5	A5	A4	A3	A3	A4	A4	A5	A3	A2	A1	A5	A5	A3	A3	A4	A4	A5	A2	A3
1056	2015-02-08 15:02:34	3	fr		2015-02-08 15:02:34	2015-02-08 14:52:54	A1	19	d2	d1	d1		A2		N	3	N	4	1	A3	A2	A5	A5	A2	A1	A4	A5	A2	A3	A4	A5	A1	A5	A4	A2	A2	A4	A5	A5	A5	A3
1059	2015-02-08 15:03:06	3	fr		2015-02-08 15:03:06	2015-02-08 14:57:08	A1	22	d2	d1	d1		A2		N	10	N	1	10	A3	A3	A4	A3	A1	A3	A2	A5	A3	A5	A2	A4	A3	A3	A4	A3	A2	A5	A3	A5	A1	A1
1060	2015-02-08 15:01:28	3	fr		2015-02-08 15:01:28	2015-02-08 14:57:14	A1	20	d2	d1	d1		A2		N	0	N	0	5	A4	A2	A5	A5	A2	A4	A2	A5	A4	A5	A3	A1	A1	A5	A4	A5	A1	A4	A4	A5	A3	A3
1061	2015-02-08 15:12:39	3	fr		2015-02-08 15:12:39	2015-02-08 15:08:40	A1	18	d2	d1	d1		A2		Y	7	N	0	10	A4	A1	A5	A5	A1	A4	A5	A4	A5	A5	A5	A5	A4	A5	A5	A4	A4	A5	A5	A5	A1	A2
1063	2015-02-08 15:20:15	3	fr		2015-02-08 15:20:15	2015-02-08 15:17:03	A1	22	d2	d1	d1		A2		N	4	N	0	10	A5	A1	A5	A5	A1	A5	A5	A5	A5	A5	A5	A5	A4	A5	A5	A5	A2	A5	A5	A5	A2	A1
1064	2015-02-08 15:26:17	3	fr		2015-02-08 15:26:17	2015-02-08 15:22:19	A1	21	d2	d1	d1		A2		Y	3	N	0	14	A5	A1	A5	A5	A1	A5	A4	A5	A5	A4	A4	A5	A4	A5	A5	A4	A1	A5	A5	A4	A2	A2
1065	2015-02-08 15:27:58	3	fr		2015-02-08 15:27:58	2015-02-08 15:22:59	A1	20	d2	d1	d1		A2		N	0	N	0	12	A3	A2	A3	A5	A1	A4	A2	A3	A4	A4	A4	A2	A2	A5	A5	A3	A1	A2	A4	A5	A3	A3
1066	2015-02-08 15:29:44	3	fr		2015-02-08 15:29:44	2015-02-08 15:23:38	A1	18	d2	d1	d1		A2		N	0	N	0	8	A5	A2	A3	A4	A1	A5	A4	A4	A4	A4	A3	A2	A1	A5	A5	A4	A1	A4	A3	A5	A1	A2
1067	2015-02-08 15:34:45	3	fr		2015-02-08 15:34:45	2015-02-08 15:27:29	A1	18	d1	d1	d1		A2		Y	7	N	2	9	A5	A1	A4	A5	A1	A5	A2	A4	A5	A5	A2	A2	A3	A5	A4	A2	A1	A4	A4	A5	A2	A2
1068	2015-02-08 15:31:42	3	fr		2015-02-08 15:31:42	2015-02-08 15:27:39	A1	18	d1	d1	d1		A2		N	0	N	0	4	A4	A1	A5	A5	A2	A4	A4	A5	A5	A2	A5	A5	A2	A5	A5	A3	A2	A5	A5	A5	A2	A3
1069	2015-02-08 15:32:31	3	fr		2015-02-08 15:32:31	2015-02-08 15:27:50	A1	20	d1	d1	d1		A2		N	0	N	0	1	A4	A1	A4	A5	A1	A3	A2	A4	A5	A4	A2	A1	A2	A4	A4	A1	A2	A3	A2	A3	A1	A1
1070	2015-02-08 15:33:41	3	fr		2015-02-08 15:33:41	2015-02-08 15:30:19	A1	21	d2	d1	d1		A2		N	0	N	0	10	A2	A4	A5	A5	A5	A2	A2	A4	A4	A1	A3	A2	A1	A5	A2	A1	A1	A5	A5	A1	A4	A1
1071	2015-02-08 16:09:36	3	fr		2015-02-08 16:09:36	2015-02-08 15:35:47	A1	19	d1	d1	d1		A2		N	0	N	0	5	A5	A2	A3	A4	A2	A4	A4	A4	A4	A4	A3	A2	A4	A4	A4	A3	A1	A4	A3	A4	A3	A2
1072	2015-02-08 15:44:59	3	fr		2015-02-08 15:44:59	2015-02-08 15:39:19	A1	24	d1	d1	d5		A5		Y	20	N	5	15	A4	A1	A2	A2	A5	A5	A5	A5	A5	A1	A5	A4	A4	A5	A3	A3	A4	A4	A5	A3	A1	A2
1073	2015-02-08 15:45:46	3	fr		2015-02-08 15:45:46	2015-02-08 15:40:43	A1	27	d2	d1	d1		A2		N	0	N	1	22	A3	A3	A5	A4	A1	A5	A4	A5	A5	A4	A3	A5	A3	A3	A4	A4	A2	A5	A4	A4	A2	A5
1074	2015-02-08 15:54:31	3	fr		2015-02-08 15:54:31	2015-02-08 15:50:08	A1	24	d2	d1	d1		A2		N	0	N	0	14	A4	A2	A5	A4	A2	A4	A5	A5	A5	A4	A4	A4	A4	A4	A5	A5	A2	A5	A4	A4	A1	A1
1075	2015-02-08 15:54:28	3	fr		2015-02-08 15:54:28	2015-02-08 15:50:37	A1	18	d2	d1	d1		A2		Y	10	N	2	2	A3	A5	A1	A1	A5	A1	A4	A5	A1	A1	A1	A5	A2	A1	A1	A1	A1	A5	A1	A1	A3	A1
1076	2015-02-08 15:58:17	3	fr		2015-02-08 15:58:17	2015-02-08 15:51:04	A1	19	d2	d1	d1		A2		N	0	N	0	3	A4	A2	A4	A4	A1	A4	A3	A4	A4	A4	A3	A3	A3	A4	A4	A4	A2	A3	A4	A4	A2	A2
1077	2015-02-08 16:03:55	3	fr		2015-02-08 16:03:55	2015-02-08 15:58:24	A1	19	d1	d1	d1		A2		N	10	N	1	15	A5	A1	A5	A5	A2	A4	A5	A5	A5	A5	A4	A5	A4	A5	A5	A2	A2	A5	A5	A5	A2	A2
1078	2015-02-08 16:15:32	3	fr		2015-02-08 16:15:32	2015-02-08 16:10:37	A1	19	d2	d1	d1		A2		N	2	N	1	15	A1	A2	A4	A5	A3	A1	A4	A5	A4	A4	A4	A3	A1	A4	A4	A2	A4	A5	A4	A5	A1	A1
1080	2015-02-08 16:19:02	3	fr		2015-02-08 16:19:02	2015-02-08 16:15:13	A1	21	d2	d1	d1		A2		N	0	N	0	4	A2	A2	A4	A4	A1	A5	A4	A4	A4	A5	A3	A4	A4	A5	A4	A3	A1	A4	A4	A4	A2	A1
1081	2015-02-08 16:35:36	3	fr		2015-02-08 16:35:36	2015-02-08 16:23:34	A1	20	d2	d1	d1		A2		N	0	N	0	6	A4	A2	A3	A5	A1	A2	A3	A3	A4	A4	A3	A2	A1	A5	A2	A5	A1	A5	A4	A5	A1	A4
1082	2015-02-08 16:44:10	3	fr		2015-02-08 16:44:10	2015-02-08 16:28:25	A1	20	d2	d1	d1		A2		N	0	N	1	30	A5	A1	A5	A5	A1	A5	A5	A5	A5	A5	A5	A4	A5	A5	A5	A4	A3	A3	A5	A5	A2	A2
1083	2015-02-08 16:35:54	3	fr		2015-02-08 16:35:54	2015-02-08 16:31:24	A1	20	d1	d1	d1		A1		N	0	N	0	2	A5	A1	A3	A5	A3	A5	A2	A1	A4	A2	A1	A1	A5	A5	A5	A5	A1	A1	A5	A4	A1	A2
1084	2015-02-08 16:43:32	3	fr		2015-02-08 16:43:32	2015-02-08 16:40:48	A1	18	d2	d1	d1		A2		N	0	N	0	2	A5	A2	A5	A2	A1	A2	A5	A4	A4	A4	A4	A4	A3	A5	A5	A4	A1	A5	A5	A5	A1	A1
1085	2015-02-08 16:46:26	3	fr		2015-02-08 16:46:26	2015-02-08 16:43:48	A1	18	d1	d1	d1		A2		N	0	N	5	25	A5	A1	A4	A3	A2	A4	A5	A5	A3	A5	A5	A5	A5	A5	A4	A5	A5	A5	A4	A4	A1	A2
1086	2015-02-08 16:57:23	3	fr		2015-02-08 16:57:23	2015-02-08 16:53:37	A1	19	d1	d1	d1		A2		N	0	N	0	31	A4	A1	A4	A4	A1	A4	A4	A5	A4	A5	A4	A5	A3	A4	A4	A3	A3	A5	A4	A5	A2	A3
1087	2015-02-08 17:01:51	3	fr		2015-02-08 17:01:51	2015-02-08 16:54:52	A1	21	d2	d1	d1		A2		N	4	N	0	15	A5	A1	A5	A5	A1	A4	A2	A5	A5	A5	A5	A5	A1	A5	A5	A5	A1	A3	A5	A5	A1	A2
1088	2015-02-08 17:08:44	3	fr		2015-02-08 17:08:44	2015-02-08 17:01:23	A1	19	d1	d1	d1		A2		Y	3	N	0	14	A5	A1	A5	A5	A1	A5	A5	A5	A4	A5	A4	A5	A5	A4	A5	A4	A2	A5	A4	A5	A3	A2
1089	2015-02-08 17:15:07	3	fr		2015-02-08 17:15:07	2015-02-08 17:11:54	A1	18	d1	d1	d1		A2		N	0	N	0	4	A4	A2	A4	A5	A2	A4	A4	A5	A5	A3	A4	A4	A4	A4	A5	A4	A3	A4	A4	A4	A2	A2
1090	2015-02-08 17:27:17	3	fr		2015-02-08 17:27:17	2015-02-08 17:19:50	A1	26	d1	d1	d1		A2		Y	20	Y	10	20	A3	A4	A3	A4	A2	A4	A4	A5	A5	A5	A4	A4	A5	A4	A4	A3	A4	A4	A4	A4	A2	A2
1091	2015-02-08 17:25:37	3	fr		2015-02-08 17:25:37	2015-02-08 17:21:43	A1	23	d2	d1	d1		A2		N	0	N	0	3	A4	A2	A5	A5	A3	A3	A3	A4	A5	A4	A3	A4	A3	A5	A5	A4	A2	A3	A4	A4	A4	A3
1092	2015-02-08 17:28:28	3	fr		2015-02-08 17:28:28	2015-02-08 17:25:52	A1	20	d2	d1	d1		A2		N	0	N	0	20	A4	A1	A3	A5	A1	A3	A4	A4	A4	A5	A5	A3	A4	A5	A5	A5	A4	A4	A5	A5	A2	A5
1093	2015-02-08 17:41:23	3	fr		2015-02-08 17:41:23	2015-02-08 17:37:20	A1	21	d2	d1	d1		A2		N	0	N	0	5	A4	A1	A4	A5	A1	A5	A5	A5	A4	A5	A5	A5	A3	A4	A4	A4	A3	A4	A4	A5	A3	A2
1094	2015-02-08 17:48:58	3	fr		2015-02-08 17:48:58	2015-02-08 17:44:59	A1	18	d1	d1	d1		A2		N	4	N	0	1	A3	A5	A5	A4	A2	A2	A4	A4	A4	A5	A3	A4	A3	A4	A5	A4	A1	A4	A4	A5	A2	A2
1095	2015-02-08 17:50:39	3	fr		2015-02-08 17:50:39	2015-02-08 17:45:18	A1	19	d2	d1	d1		A2		N	0	N	0	15	A3	A2	A5	A4	A1	A3	A3	A5	A5	A5	A4	A4	A3	A3	A4	A4	A2	A3	A3	A4	A2	A2
1096	2015-02-08 17:51:46	3	fr		2015-02-08 17:51:46	2015-02-08 17:45:56	A1	18	d1	d1	d1		A2		N	0	N	4	8	A3	A2	A3	A5	A5	A1	A4	A4	A5	A1	A2	A1	A2	A5	A3	A2	A3	A5	A5	A4	A3	A4
1099	2015-02-08 17:53:09	3	fr		2015-02-08 17:53:09	2015-02-08 17:50:51	A1	20	d1	d1	d1		A2		N	0	N	15	20	A5	A1	A3	A4	A1	A5	A5	A5	A5	A4	A5	A5	A5	A5	A5	A4	A5	A5	A5	A5	A1	A5
1100	2015-02-08 17:56:32	3	fr		2015-02-08 17:56:32	2015-02-08 17:53:36	A1	22	d2	d1	d1			Rwanda	N	0	N	0	5	A4	A2	A4	A4	A3	A4	A4	A4	A3	A3	A3	A3	A3	A3	A4	A4	A2	A3	A3	A4	A3	A2
1102	2015-02-08 18:10:30	3	fr		2015-02-08 18:10:30	2015-02-08 18:06:53	A1	21	d2	d1	d1		A2		N	0	N	0	10	A4	A2	A5	A5	A5	A3	A4	A5	A5	A3	A3	A4	A3	A4	A1	A3	A1	A5	A4	A2	A1	A1
1105	2015-02-08 18:47:49	3	fr		2015-02-08 18:47:49	2015-02-08 18:40:07	A1	21	d2	d1	d1			Maroc	N	0	N	4	14	A3	A2	A3	A5	A1	A3	A3	A4	A5	A4	A5	A2	A4	A4	A5	A4	A3	A4	A4	A5	A1	A4
1107	2015-02-08 18:48:21	3	fr		2015-02-08 18:48:21	2015-02-08 18:44:53	A1	20	d1	d1	d3			Guatemala	N	0	N	3	15	A4	A1	A5	A4	A2	A2	A4	A5	A4	A2	A3	A4	A4	A5	A4	A4	A1	A4	A4	A2	A1	A1
1108	2015-02-08 18:53:35	3	fr		2015-02-08 18:53:35	2015-02-08 18:49:20	A1	21	d2	d1	d1			Djibouti	N	0	N	0	0	A1	A1	A1	A1	A1	A1	A1	A1	A1	A1	A1	A1	A1	A1	A1	A1	A1	A1	A1	A1	A1	A1
1109	2015-02-08 19:05:55	3	fr		2015-02-08 19:05:55	2015-02-08 18:59:52	A1	24	d1	d1	d1		A2		Y	8	N	0	2	A5	A1	A5	A5	A2	A4	A4	A5	A4	A4	A3	A5	A4	A4	A5	A4	A2	A5	A4	A4	A1	A1
1110	2015-02-08 19:54:38	3	fr		2015-02-08 19:54:38	2015-02-08 19:43:47	A1	18	d2	d1	d1		A2		N	3	N	0	12	A3	A2	A5	A5	A5	A4	A2	A5	A4	A1	A5	A5	A4	A5	A5	A1	A2	A3	A4	A5	A1	A1
1111	2015-02-08 19:58:00	3	fr		2015-02-08 19:58:00	2015-02-08 19:55:17	A1	19	d1	d1	d1		A2		N	0	N	0	35	A4	A4	A5	A5	A5	A4	A5	A5	A4	A1	A5	A5	A4	A4	A5	A4	A2	A5	A5	A4	A1	A2
1112	2015-02-08 20:42:52	3	fr		2015-02-08 20:42:52	2015-02-08 20:39:45	A1	20	d1	d1	d1		A2		N	0	N	5	150	A4	A1	A4	A4	A3	A4	A5	A5	A3	A3	A2	A3	A5	A4	A5	A3	A2	A5	A3	A3	A1	A1
1116	2015-02-08 23:29:15	3	fr		2015-02-08 23:29:15	2015-02-08 23:23:30	A1	18	d1	d1	d1		A2		N	0	N	0	10	A3	A1	A5	A4	A4	A3	A4	A5	A5	A2	A4	A1	A3	A1	A3	A4	A1	A4	A4	A4	A1	A5
1118	2015-02-09 01:29:41	3	fr		2015-02-09 01:29:41	2015-02-09 01:21:33	A1	22	d2	d1	d1		A2		N	0	N	1	8	A3	A2	A3	A5	A2	A1	A4	A4	A4	A3	A2	A4	A2	A5	A4	A3	A1	A4	A4	A4	A2	A1
1119	2015-02-09 01:43:14	3	fr		2015-02-09 01:43:14	2015-02-09 01:37:44	A1	19	d1	d1	d1		A2		N	1	N	4	25	A4	A2	A5	A5	A2	A4	A3	A5	A4	A4	A3	A3	A5	A4	A5	A3	A3	A5	A4	A5	A1	A2
1121	2015-02-09 01:47:39	3	fr		2015-02-09 01:47:39	2015-02-09 01:43:14	A1	18	d1	d1	d1		A2		N	0	N	0	5	A2	A1	A5	A5	A5	A4	A3	A5	A5	A1	A2	A4	A2	A5	A5	A3	A3	A5	A5	A5	A2	A4
1122	2015-02-09 01:53:43	3	fr		2015-02-09 01:53:43	2015-02-09 01:49:58	A1	21	d2	d1	d1		A2		N	0	N	0	40	A3	A1	A4	A5	A4	A1	A4	A5	A5	A2	A4	A5	A2	A5	A5	A4	A4	A4	A5	A4	A2	A2
1123	2015-02-09 01:58:35	3	fr		2015-02-09 01:58:35	2015-02-09 01:53:52	A1	21	d2	d1	d1		A2		N	0	N	0	50	A4	A1	A4	A3	A2	A3	A2	A5	A4	A4	A3	A2	A4	A5	A5	A5	A2	A5	A5	A5	A1	A1
1124	2015-02-09 02:15:14	3	fr		2015-02-09 02:15:14	2015-02-09 02:11:31	A1	20	d2	d1	d1		A2		N	0	N	0	9	A5	A1	A4	A4	A1	A5	A4	A5	A4	A4	A4	A5	A5	A5	A5	A5	A3	A5	A5	A4	A1	A1
1126	2015-02-09 02:37:19	3	fr		2015-02-09 02:37:19	2015-02-09 02:19:52	A1	19	d1	d1	d1		A2		N	0	N	3	15	A5	A2	A5	A5	A2	A4	A2	A5	A5	A4	A4	A2	A4	A4	A4	A4	A2	A4	A4	A5	A1	A4
1127	2015-02-09 02:28:23	3	fr		2015-02-09 02:28:23	2015-02-09 02:24:35	A1	21	d1	d1	d1		A2		N	0	N	0	20	A3	A3	A2	A4	A4	A4	A5	A5	A4	A3	A4	A1	A1	A2	A3	A3	A1	A3	A2	A4	A3	A4
1128	2015-02-09 02:51:43	3	fr		2015-02-09 02:51:43	2015-02-09 02:41:28	A1	19	d2	d3	d3			Lycee, Uruguay	Y	7	N	0	8	A3	A3	A4	A4	A1	A5	A4	A5	A5	A4	A2	A5	A5	A3	A4	A5	A1	A5	A5	A4	A2	A1
1129	2015-02-09 04:17:04	3	fr		2015-02-09 04:17:04	2015-02-09 02:42:58	A1	25	d1	d1	d1		A2		N	0	N	0	20	A4	A1	A5	A4	A3	A5	A4	A5	A5	A4	A5	A3	A2	A3	A4	A4	A2	A4	A3	A4	A2	A2
1130	2015-02-09 02:49:29	3	fr		2015-02-09 02:49:29	2015-02-09 02:46:39	A1	21	d2	d1	d10		A2		Y	6	N	1	18	A5	A1	A4	A4	A1	A5	A5	A5	A5	A5	A5	A5	A4	A5	A5	A5	A4	A5	A5	A5	A1	A1
1131	2015-02-09 02:52:48	3	fr		2015-02-09 02:52:48	2015-02-09 02:48:27	A1	21	d2	d1	d1		A2		N	0	N	0	5	A4	A2	A5	A5	A1	A4	A3	A4	A5	A4	A4	A5	A2	A4	A4	A4	A2	A5	A4	A5	A4	A4
1133	2015-02-09 02:58:55	3	fr		2015-02-09 02:58:55	2015-02-09 02:51:54	A1	24	d2	d1	d7		A2		N	3	N	0	21	A5	A2	A4	A2	A1	A5	A4	A4	A4	A4	A3	A4	A3	A3	A4	A3	A2	A4	A3	A4	A4	A1
1134	2015-02-09 02:57:55	3	fr		2015-02-09 02:57:55	2015-02-09 02:55:09	A1	24	d1	d1	d1		A2		N	7	N	1	50	A5	A1	A5	A5	A1	A5	A4	A5	A5	A5	A4	A2	A5	A5	A5	A4	A4	A5	A5	A5	A1	A1
1135	2015-02-09 03:11:58	3	fr		2015-02-09 03:11:58	2015-02-09 03:07:59	A1	25	d2	d1	d1		A2		N	3	N	0	7	A3	A2	A4	A4	A2	A3	A3	A4	A5	A4	A2	A4	A2	A4	A4	A4	A2	A4	A4	A4	A2	A2
1138	2015-02-09 03:23:48	3	fr		2015-02-09 03:23:48	2015-02-09 03:20:46	A1	25	d2	d1	d1		A2		N	3	N	3	15	A3	A2	A4	A5	A3	A3	A4	A5	A4	A3	A4	A4	A2	A4	A4	A3	A3	A4	A4	A4	A3	A3
1139	2015-02-09 03:25:01	3	fr		2015-02-09 03:25:01	2015-02-09 03:21:32	A1	24	d2	d1	d1		A2		Y	8	N	2	6	A4	A1	A5	A4	A1	A4	A5	A5	A5	A5	A5	A4	A5	A5	A5	A4	A4	A4	A4	A5	A2	A1
1140	2015-02-09 03:28:17	3	fr		2015-02-09 03:28:17	2015-02-09 03:25:19	A1	26	d2	d1	d1		A2		N	0	N	0	35	A4	A1	A4	A5	A1	A5	A4	A4	A5	A5	A4	A3	A2	A4	A2	A4	A3	A3	A4	A4	A1	A3
1141	2015-02-09 03:38:31	3	fr		2015-02-09 03:38:31	2015-02-09 03:33:20	A1	21	d2	d1	d1		A2		N	0	N	0	40	A4	A1	A4	A4	A1	A4	A4	A5	A5	A5	A5	A5	A4	A5	A5	A5	A4	A4	A5	A5	A2	A5
1142	2015-02-09 03:45:43	3	fr		2015-02-09 03:45:43	2015-02-09 03:41:46	A1	22	d1	d1	d1		A2		N	0	N	0	20	A5	A1	A4	A4	A2	A4	A5	A4	A4	A4	A5	A4	A3	A4	A3	A5	A3	A5	A4	A4	A1	A3
1143	2015-02-09 03:45:09	3	fr		2015-02-09 03:45:09	2015-02-09 03:42:20	A1	25	d2	d1	d1		A2		N	0	N	0	4	A4	A1	A5	A5	A5	A3	A4	A4	A4	A2	A2	A2	A1	A3	A3	A2	A1	A2	A3	A2	A3	A3
1144	2015-02-09 03:57:17	3	fr		2015-02-09 03:57:17	2015-02-09 03:49:49	A1	23	d2	d1	d1		A2		N	3	N	0	3	A4	A1	A5	A5	A1	A4	A4	A5	A4	A5	A4	A4	A4	A4	A5	A5	A2	A5	A4	A4	A2	A1
1145	2015-02-09 03:58:17	3	fr		2015-02-09 03:58:17	2015-02-09 03:53:22	A1	22	d2	d1	d1		A2		N	0	N	0	10	A2	A1	A5	A5	A1	A2	A3	A5	A4	A5	A3	A4	A4	A4	A5	A5	A1	A5	A4	A5	A2	A3
1146	2015-02-09 04:19:08	3	fr		2015-02-09 04:19:08	2015-02-09 04:02:05	A1	20	d2	d1	d1		A2		N	0	N	0	3	A4	A2	A4	A4	A1	A4	A5	A4	A5	A5	A4	A3	A1	A4	A5	A4	A2	A4	A5	A4	A4	A3
1147	2015-02-09 04:08:53	3	fr		2015-02-09 04:08:53	2015-02-09 04:05:19	A1	18	d2	d1	d1		A2		Y	11	N	1	3	A5	A3	A5	A5	A1	A4	A2	A4	A4	A5	A2	A4	A4	A4	A5	A3	A1	A4	A3	A5	A2	A1
1148	2015-02-09 04:18:52	3	fr		2015-02-09 04:18:52	2015-02-09 04:15:20	A1	21	d1	d1	d1		A2		N	0	N	0	1	A3	A5	A2	A2	A4	A2	A5	A5	A3	A1	A4	A4	A1	A2	A5	A3	A1	A4	A2	A4	A1	A3
1149	2015-02-09 04:26:14	3	fr		2015-02-09 04:26:14	2015-02-09 04:22:15	A1	19	d1	d1	d1		A2		N	0	N	0	3	A5	A1	A4	A5	A1	A5	A5	A5	A5	A5	A5	A3	A4	A5	A5	A5	A4	A5	A5	A5	A1	A2
1151	2015-02-09 04:27:20	3	fr		2015-02-09 04:27:20	2015-02-09 04:24:24	A1	21	d1	d1	d1		A2		N	0	N	0	10	A4	A2	A5	A5	A1	A4	A1	A5	A3	A5	A4	A5	A3	A4	A5	A1	A1	A2	A2	A5	A1	A1
1154	2015-02-09 04:38:05	3	fr		2015-02-09 04:38:05	2015-02-09 04:32:07	A1	23	d1	d1	d1		A2		N	0	N	0	50	A4	A1	A4	A4	A4	A4	A3	A3	A4	A2	A3	A2	A3	A4	A5	A4	A2	A4	A4	A5	A1	A3
1155	2015-02-09 04:37:58	3	fr		2015-02-09 04:37:58	2015-02-09 04:35:35	A1	27	d1	d1	d1		A2		N	0	N	0	20	A4	A2	A3	A4	A5	A2	A1	A1	A4	A1	A2	A1	A1	A4	A2	A1	A1	A2	A3	A4	A4	A2
1156	2015-02-09 04:45:51	3	fr		2015-02-09 04:45:51	2015-02-09 04:41:16	A1	19	d1	d1	d1		A2		Y	7	N	2	25	A4	A2	A5	A4	A1	A4	A3	A5	A4	A4	A3	A5	A4	A5	A5	A3	A3	A4	A4	A5	A1	A2
1157	2015-02-09 04:45:51	3	fr		2015-02-09 04:45:51	2015-02-09 04:43:32	A1	19	d1	d1	d1		A2		N	0	N	0	3	A3	A4	A1	A1	A2	A1	A3	A2	A4	A4	A3	A1	A1	A1	A5	A1	A1	A4	A2	A5	A1	A5
1159	2015-02-09 04:55:48	3	fr		2015-02-09 04:55:48	2015-02-09 04:50:11	A1	18	d2	d1	d1		A2		N	0	N	0	42	A4	A1	A5	A5	A1	A4	A3	A5	A4	A4	A5	A5	A3	A4	A4	A3	A3	A5	A4	A5	A2	A1
1162	2015-02-09 05:07:58	3	fr		2015-02-09 05:07:58	2015-02-09 05:03:02	A1	22	d2	d1	d1		A2		Y	4	N	1	20	A4	A1	A5	A5	A1	A4	A4	A5	A4	A5	A5	A5	A5	A3	A5	A4	A3	A5	A4	A5	A1	A1
1163	2015-02-09 05:08:09	3	fr		2015-02-09 05:08:09	2015-02-09 05:04:27	A1	22	d2	d1	d1		A2		Y	12	N	5	20	A4	A1	A4	A5	A2	A4	A5	A5	A5	A4	A5	A4	A3	A4	A4	A4	A3	A4	A4	A4	A3	A2
1164	2015-02-09 05:24:49	3	fr		2015-02-09 05:24:49	2015-02-09 05:07:59	A1	21	d1	d1	d1		A2		N	0	N	0	15	A4	A2	A4	A5	A4	A4	A4	A5	A4	A2	A3	A2	A1	A5	A5	A4	A1	A5	A5	A5	A3	A4
1167	2015-02-09 05:24:05	3	fr		2015-02-09 05:24:05	2015-02-09 05:19:35	A1	18	d2	d1	d1		A2		N	0	N	0	2	A4	A3	A5	A5	A1	A3	A1	A4	A4	A5	A2	A4	A2	A4	A4	A5	A1	A5	A4	A3	A1	A3
1168	2015-02-09 05:27:11	3	fr		2015-02-09 05:27:11	2015-02-09 05:21:35	A1	21	d2	d1	d1		A2		Y	7	N	0	7	A5	A1	A5	A4	A1	A4	A2	A5	A5	A5	A4	A5	A4	A5	A5	A4	A2	A4	A5	A5	A2	A4
1171	2015-02-09 05:36:12	3	fr		2015-02-09 05:36:12	2015-02-09 05:32:17	A1	21	d2	d1	d1		A2		N	3	N	0	30	A4	A1	A5	A5	A1	A3	A4	A5	A4	A4	A5	A2	A4	A4	A5	A3	A2	A5	A5	A5	A1	A1
1174	2015-02-09 05:44:54	3	fr		2015-02-09 05:44:54	2015-02-09 05:41:17	A1	20	d2	d1	d1		A2		Y	6	N	1	4	A5	A1	A5	A4	A1	A4	A3	A5	A4	A5	A4	A5	A5	A4	A5	A4	A2	A4	A4	A5	A1	A1
1175	2015-02-09 05:52:32	3	fr		2015-02-09 05:52:32	2015-02-09 05:46:01	A1	22	d2	d1	d1		A2		Y	10	N	1	30	A4	A1	A5	A4	A1	A3	A3	A4	A4	A5	A3	A4	A4	A5	A5	A4	A2	A2	A4	A5	A2	A3
1176	2015-02-09 05:53:06	3	fr		2015-02-09 05:53:06	2015-02-09 05:48:09	A1	23	d2	d1	d1		A2		N	0	N	0	25	A4	A1	A5	A4	A1	A4	A5	A5	A5	A5	A5	A4	A3	A4	A5	A4	A4	A4	A4	A5	A3	A4
1177	2015-02-09 05:55:22	3	fr		2015-02-09 05:55:22	2015-02-09 05:51:19	A1	33	d2	d1	d1		A2		Y	8	N	0	3	A4	A2	A5	A5	A3	A4	A3	A4	A4	A3	A2	A3	A3	A5	A4	A3	A2	A4	A5	A5	A2	A2
1178	2015-02-09 06:05:26	3	fr		2015-02-09 06:05:26	2015-02-09 06:00:53	A1	21	d1	d1	d1		A2		N	0	N	0	14	A4	A1	A4	A5	A4	A3	A4	A5	A5	A1	A2	A4	A1	A3	A2	A2	A2	A1	A3	A4	A3	A1
1179	2015-02-09 06:20:32	3	fr		2015-02-09 06:20:32	2015-02-09 06:15:24	A1	22	d2	d1	d1		A2		N	0	N	0	1	A3	A4	A4	A5	A4	A3	A2	A3	A4	A2	A2	A2	A3	A4	A4	A3	A1	A1	A3	A4	A4	A3
1181	2015-02-09 06:25:56	3	fr		2015-02-09 06:25:56	2015-02-09 06:19:46	A1	18	d1	d1	d1			Abu Dhabi	N	0	N	0	20	A4	A1	A4	A5	A2	A4	A5	A5	A4	A3	A4	A5	A1	A4	A4	A5	A3	A5	A5	A5	A4	A2
1182	2015-02-09 06:31:15	3	fr		2015-02-09 06:31:15	2015-02-09 06:22:23	A1	24	d1	d1	d1			CAMEROUN	N	0	N	0	0	A4	A4	A4	A3	A2	A4	A4	A4	A4	A4	A3	A1	A1	A4	A4	A4	A1	A4	A4	A4	A2	A1
1183	2015-02-09 06:30:40	3	fr		2015-02-09 06:30:40	2015-02-09 06:23:47	A1	19	d1	d1	d1		A2		Y	4	N	0	21	A4	A1	A5	A5	A1	A4	A5	A5	A5	A4	A5	A5	A5	A4	A5	A4	A1	A4	A5	A5	A3	A1
1184	2015-02-09 06:34:01	3	fr		2015-02-09 06:34:01	2015-02-09 06:27:39	A1	31	d2	d1	d1		A2		N	0	N	0	0	A3	A1	A3	A4	A2	A2	A2	A4	A2	A4	A1	A4	A2	A2	A4	A3	A1	A4	A2	A4	A4	A4
1186	2015-02-09 06:30:27	3	fr		2015-02-09 06:30:27	2015-02-09 06:28:11	A1	20	d2	d1	d1		A2		N	0	N	0	9	A4	A3	A5	A5	A1	A5	A4	A5	A5	A5	A4	A3	A3	A4	A5	A3	A3	A5	A5	A5	A2	A4
1187	2015-02-09 06:37:06	3	fr		2015-02-09 06:37:06	2015-02-09 06:30:19	A1	21	d2	d1	d1		A2		N	4	N	4	5	A3	A2	A5	A3	A1	A2	A2	A5	A3	A4	A2	A1	A5	A5	A5	A4	A2	A5	A1	A2	A1	A1
1188	2015-02-09 06:36:07	3	fr		2015-02-09 06:36:07	2015-02-09 06:31:48	A1	20	d1	d1	d6			egypte	N	1	N	10	20	A5	A1	A5	A5	A2	A5	A5	A5	A5	A3	A5	A5	A5	A4	A4	A3	A5	A5	A5	A5	A2	A2
1190	2015-02-09 07:01:41	3	fr		2015-02-09 07:01:41	2015-02-09 06:57:23	A1	21	d1	d1	d1		A2		N	0	N	5	7	A4	A3	A2	A4	A1	A4	A4	A5	A5	A5	A4	A5	A5	A5	A3	A2	A1	A5	A5	A4	A1	A2
1191	2015-02-09 07:02:40	3	fr		2015-02-09 07:02:40	2015-02-09 06:58:58	A1	20	d2	d1	d1		A2		N	0	N	1	10	A4	A2	A5	A4	A2	A5	A4	A5	A5	A4	A4	A5	A4	A4	A3	A5	A4	A5	A4	A4	A3	A3
1192	2015-02-09 07:09:15	3	fr		2015-02-09 07:09:15	2015-02-09 07:05:39	A1	20	d2	d1	d1		A2		N	12	N	2	3	A4	A3	A4	A4	A1	A3	A2	A5	A4	A4	A3	A4	A3	A4	A4	A3	A1	A5	A4	A4	A2	A2
1195	2015-02-09 07:12:16	3	fr		2015-02-09 07:12:16	2015-02-09 07:08:36	A1	21	d1	d1	d1		A2		Y	8	N	0	15	A4	A2	A4	A5	A2	A4	A4	A4	A4	A5	A2	A1	A4	A5	A5	A2	A2	A4	A4	A5	A2	A1
1196	2015-02-09 07:19:42	3	fr		2015-02-09 07:19:42	2015-02-09 07:15:02	A1	18	d1	d1	d1		A2		N	0	N	2	1	A3	A4	A3	A5	A2	A2	A3	A4	A5	A3	A2	A1	A3	A4	A1	A2	A2	A5	A4	A4	A3	A3
1197	2015-02-09 07:25:49	3	fr		2015-02-09 07:25:49	2015-02-09 07:22:02	A1	27	d1	d1	d1		A1		N	0	N	0	10	A4	A1	A5	A5	A1	A3	A3	A5	A4	A1	A4	A4	A1	A5	A3	A1	A2	A5	A5	A5	A1	A3
1199	2015-02-09 07:33:22	3	fr		2015-02-09 07:33:22	2015-02-09 07:28:34	A1	20	d2	d1	d1		A2		Y	2	N	2	30	A4	A2	A5	A4	A4	A4	A3	A5	A3	A2	A4	A5	A3	A4	A2	A2	A3	A4	A4	A4	A2	A1
1201	2015-02-09 07:35:09	3	fr		2015-02-09 07:35:09	2015-02-09 07:31:47	A1	24	d2	d1	d1		A2		N	13	N	2	3	A4	A1	A4	A4	A1	A4	A4	A5	A5	A5	A3	A4	A3	A4	A5	A4	A3	A5	A4	A5	A1	A2
1203	2015-02-09 07:55:53	3	fr		2015-02-09 07:55:53	2015-02-09 07:49:02	A1	22	d1	d1	d1		A2		N	5	N	2	1	A4	A3	A4	A5	A4	A5	A4	A4	A4	A1	A2	A2	A5	A5	A5	A3	A2	A4	A4	A3	A1	A2
1204	2015-02-09 07:55:31	3	fr		2015-02-09 07:55:31	2015-02-09 07:50:41	A1	18	d1	d1	d1		A2		N	10	N	10	20	A3	A2	A4	A3	A2	A3	A4	A4	A5	A4	A4	A4	A5	A4	A4	A4	A2	A5	A4	A4	A1	A1
1205	2015-02-09 08:03:09	3	fr		2015-02-09 08:03:09	2015-02-09 07:59:48	A1	20	d1	d1	d1		A2		N	0	N	0	25	A5	A1	A4	A5	A3	A4	A5	A5	A5	A3	A4	A2	A1	A4	A3	A3	A1	A4	A4	A3	A2	A1
1206	2015-02-09 08:12:06	3	fr		2015-02-09 08:12:06	2015-02-09 08:06:11	A1	23	d2	d1	d1		A2		N	0	N	0	14	A5	A1	A5	A5	A2	A4	A4	A4	A3	A3	A4	A3	A4	A4	A4	A5	A1	A4	A4	A4	A1	A4
1207	2015-02-09 08:11:55	3	fr		2015-02-09 08:11:55	2015-02-09 08:07:45	A1	25	d2	d1	d1		A2		N	0	N	0	10	A3	A2	A3	A4	A1	A3	A4	A4	A5	A5	A3	A2	A2	A4	A4	A2	A1	A2	A3	A4	A3	A2
1208	2015-02-09 08:26:58	3	fr		2015-02-09 08:26:58	2015-02-09 08:16:43	A1	19	d2	d1	d1		A2		N	0	N	0	42	A4	A2	A5	A4	A1	A3	A3	A4	A3	A2	A2	A4	A1	A2	A5	A1	A1	A5	A3	A4	A3	A2
1209	2015-02-09 08:26:52	3	fr		2015-02-09 08:26:52	2015-02-09 08:21:48	A1	23	d1	d1	d1		A2		N	0	N	0	4	A4	A2	A4	A4	A1	A1	A4	A5	A4	A2	A2	A4	A3	A4	A4	A2	A1	A5	A5	A5	A2	A5
1210	2015-02-09 08:29:18	3	fr		2015-02-09 08:29:18	2015-02-09 08:24:41	A1	20	d2	d1	d1		A2		N	0	N	1	6	A4	A1	A5	A5	A2	A4	A4	A4	A4	A4	A3	A3	A5	A5	A4	A4	A3	A4	A4	A4	A1	A2
1211	2015-02-09 08:54:56	3	fr		2015-02-09 08:54:56	2015-02-09 08:51:49	A1	18	d1	d1	d1		A2		Y	10	N	5	7	A4	A1	A5	A5	A5	A4	A5	A5	A5	A1	A4	A5	A5	A5	A5	A5	A5	A5	A5	A5	A1	A1
1212	2015-02-09 08:57:09	3	fr		2015-02-09 08:57:09	2015-02-09 08:52:51	A1	24	d2	d1	d1		A2		N	0	N	0	20	A5	A1	A5	A4	A1	A3	A1	A5	A4	A4	A4	A5	A2	A4	A4	A5	A1	A5	A4	A4	A1	A1
1213	2015-02-09 09:07:24	3	fr		2015-02-09 09:07:24	2015-02-09 09:04:04	A1	22	d2	d1	d1		A2		Y	10	N	0	10	A4	A1	A4	A3	A1	A3	A5	A5	A5	A5	A5	A2	A3	A5	A5	A5	A1	A5	A5	A5	A3	A1
1215	2015-02-09 09:12:47	3	fr		2015-02-09 09:12:47	2015-02-09 09:07:24	A1	24	d2	d1	d1		A2		N	8	N	0	2	A5	A1	A4	A5	A1	A4	A4	A4	A4	A5	A3	A2	A2	A5	A5	A4	A1	A4	A3	A4	A2	A2
1216	2015-02-09 09:45:24	3	fr		2015-02-09 09:45:24	2015-02-09 09:42:30	A1	25	d2	d3	d1		A2		N	0	N	0	5	A5	A3	A4	A4	A2	A4	A3	A4	A4	A4	A2	A2	A3	A4	A3	A5	A2	A2	A4	A3	A2	A3
1217	2015-02-09 09:50:52	3	fr		2015-02-09 09:50:52	2015-02-09 09:46:41	A1	24	d2	d1		kabyle		kabylie (Algérie)	N	1	N	0	2	A5	A4	A4	A4	A2	A4	A4	A4	A4	A4	A3	A4	A1	A4	A4	A3	A1	A4	A4	A4	A2	A3
1218	2015-02-09 09:59:51	3	fr		2015-02-09 09:59:51	2015-02-09 09:57:11	A1	35	d2	d1	d1		A2		Y	21	N	2	2	A4	A3	A5	A4	A3	A4	A4	A5	A4	A3	A4	A5	A4	A4	A5	A3	A4	A3	A4	A1	A1	A1
1220	2015-02-09 10:12:34	3	fr		2015-02-09 10:12:34	2015-02-09 10:08:21	A1	18	d2	d1	d1		A2		Y	8	N	5	20	A4	A1	A5	A5	A1	A5	A3	A5	A4	A4	A4	A5	A4	A5	A4	A5	A3	A3	A5	A3	A1	A1
1221	2015-02-09 10:15:41	3	fr		2015-02-09 10:15:41	2015-02-09 10:11:11	A1	19	d2	d1	d1		A2		N	0	N	0	1	A3	A3	A2	A4	A1	A2	A3	A3	A4	A4	A3	A2	A1	A4	A4	A3	A1	A3	A3	A4	A2	A2
1224	2015-02-09 10:33:39	3	fr		2015-02-09 10:33:39	2015-02-09 10:29:56	A1	24	d1	d1	d1		A2		Y	1	N	0	10	A4	A2	A3	A4	A1	A4	A4	A5	A4	A4	A5	A5	A5	A5	A5	A4	A3	A5	A5	A5	A1	A1
1225	2015-02-09 11:02:06	3	fr		2015-02-09 11:02:06	2015-02-09 10:48:52	A1	25	d2	d1	d1			Bénin	N	2	N	0	14	A3	A2	A5	A4	A1	A4	A4	A5	A3	A4	A4	A4	A3	A4	A5	A3	A1	A2	A5	A5	A2	A2
1226	2015-02-09 10:55:29	3	fr		2015-02-09 10:55:29	2015-02-09 10:50:23	A1	21	d2	d1	d1		A2		N	0	N	0	12	A4	A1	A3	A5	A1	A4	A4	A4	A5	A5	A4	A3	A4	A5	A5	A4	A3	A3	A5	A5	A1	A2
1227	2015-02-09 10:59:42	3	fr		2015-02-09 10:59:42	2015-02-09 10:56:34	A1	21	d2	d1	d1		A2		N	0	N	0	15	A4	A1	A5	A5	A3	A2	A5	A5	A5	A3	A5	A5	A5	A5	A5	A5	A5	A5	A5	A5	A1	A1
1229	2015-02-09 11:01:34	3	fr		2015-02-09 11:01:34	2015-02-09 10:59:01	A1	24	d2	d1	d1		A2		N	0	N	0	10	A4	A1	A5	A4	A1	A3	A4	A5	A4	A4	A3	A5	A4	A4	A4	A3	A3	A5	A3	A4	A1	A3
1230	2015-02-09 11:06:05	3	fr		2015-02-09 11:06:05	2015-02-09 11:01:41	A1	27	d2	d1	d1		A2		N	4	N	0	1	A4	A4	A4	A3	A1	A2	A3	A5	A4	A4	A2	A3	A2	A2	A2	A3	A1	A4	A3	A4	A2	A3
1232	2015-02-09 11:14:32	3	fr		2015-02-09 11:14:32	2015-02-09 11:09:26	A1	19	d1	d1	d1		A2		N	0	N	4	15	A4	A2	A5	A5	A5	A3	A5	A5	A5	A1	A5	A5	A2	A5	A5	A3	A1	A5	A4	A4	A1	A5
1233	2015-02-09 11:35:02	3	fr		2015-02-09 11:35:02	2015-02-09 11:31:21	A1	28	d1	d1	d1		A2		N	0	N	0	28	A4	A1	A5	A4	A3	A4	A5	A5	A5	A3	A3	A5	A2	A4	A4	A2	A3	A4	A5	A5	A3	A1
1236	2015-02-09 11:46:57	3	fr		2015-02-09 11:46:57	2015-02-09 11:42:53	A1	19	d2	d1	d1		A2		Y	1	N	0	10	A5	A1	A5	A5	A3	A4	A4	A4	A3	A3	A4	A2	A3	A5	A4	A4	A2	A4	A3	A3	A3	A2
1237	2015-02-09 11:49:13	3	fr		2015-02-09 11:49:13	2015-02-09 11:46:22	A1	19	d2	d1	d1		A2		Y	13	N	3	15	A5	A1	A5	A4	A2	A3	A3	A5	A4	A4	A4	A5	A5	A4	A4	A4	A3	A4	A4	A5	A3	A1
1238	2015-02-09 11:57:29	3	fr		2015-02-09 11:57:29	2015-02-09 11:52:50	A1	24	d1	d1	d1		A2		N	0	N	0	7	A2	A2	A4	A2	A2	A3	A4	A4	A4	A3	A2	A3	A2	A4	A4	A3	A1	A4	A3	A2	A2	A2
1239	2015-02-09 12:14:21	3	fr		2015-02-09 12:14:21	2015-02-09 12:07:11	A1	21	d1	d1	d1		A2		N	0	N	0	5	A4	A1	A5	A5	A2	A4	A4	A5	A5	A4	A5	A5	A4	A5	A4	A3	A2	A5	A5	A5	A1	A4
1240	2015-02-09 12:19:10	3	fr		2015-02-09 12:19:10	2015-02-09 12:13:31	A1	22	d2	d1	d1		A2		N	4	N	0	4	A4	A1	A5	A5	A1	A3	A4	A4	A5	A5	A5	A5	A4	A5	A5	A5	A4	A5	A5	A4	A2	A1
1241	2015-02-09 12:30:34	3	fr		2015-02-09 12:30:34	2015-02-09 12:22:28	A1	19	d2	d2	d1		A2		N	0	N	0	16	A5	A1	A5	A5	A2	A5	A5	A5	A5	A4	A4	A3	A4	A4	A4	A3	A3	A5	A5	A4	A2	A2
1244	2015-02-09 12:45:58	3	fr		2015-02-09 12:45:58	2015-02-09 12:37:46	A1	42	d2	d1	d1		A2		N	0	N	0	10	A5	A1	A3	A4	A4	A4	A4	A5	A5	A4	A5	A5	A4	A5	A5	A5	A3	A4	A2	A4	A2	A1
1245	2015-02-09 12:50:44	3	fr		2015-02-09 12:50:44	2015-02-09 12:45:42	A1	21	d2	d1	d1		A2		N	0	N	0	7	A4	A2	A5	A5	A1	A3	A2	A5	A4	A3	A1	A3	A3	A5	A5	A4	A1	A5	A5	A5	A1	A1
1247	2015-02-09 13:00:35	3	fr		2015-02-09 13:00:35	2015-02-09 12:57:37	A1	18	d2	d1	d1		A2		N	4	N	0	5	A4	A4	A5	A2	A1	A5	A2	A4	A3	A5	A3	A2	A4	A4	A4	A5	A2	A4	A4	A5	A2	A1
1248	2015-02-09 13:11:10	3	fr		2015-02-09 13:11:10	2015-02-09 13:07:06	A1	19	d2	d1	d1		A2		Y	5	N	0	30	A4	A1	A5	A5	A1	A4	A4	A5	A5	A5	A4	A5	A4	A5	A4	A3	A2	A5	A5	A5	A2	A1
1249	2015-02-09 13:13:41	3	fr		2015-02-09 13:13:41	2015-02-09 13:09:05	A1	22	d2	d1	d1		A2		Y	10	N	0	2	A4	A2	A3	A2	A2	A4	A3	A3	A2	A2	A2	A2	A2	A3	A4	A3	A1	A4	A2	A4	A3	A2
1250	2015-02-09 13:16:55	3	fr		2015-02-09 13:16:55	2015-02-09 13:11:23	A1	24	d2	d1	d1		A2		N	0	N	0	3	A4	A2	A4	A4	A2	A3	A4	A5	A5	A4	A4	A4	A3	A4	A5	A4	A2	A4	A3	A5	A2	A3
1251	2015-02-09 13:25:11	3	fr		2015-02-09 13:25:11	2015-02-09 13:22:00	A1	18	d2	d1	d1		A2		Y	9	N	1	8	A4	A3	A4	A5	A2	A5	A4	A5	A4	A3	A5	A5	A5	A3	A4	A5	A4	A5	A2	A2	A3	A1
1252	2015-02-09 13:25:14	3	fr		2015-02-09 13:25:14	2015-02-09 13:22:31	A1	28	d2	d1		turc		Turquie	N	0	N	0	2	A4	A1	A5	A4	A2	A2	A1	A5	A4	A4	A5	A5	A2	A5	A4	A3	A1	A4	A3	A4	A1	A1
1253	2015-02-09 13:39:04	3	fr		2015-02-09 13:39:04	2015-02-09 13:32:07	A1	20	d2	d1	d1		A2		N	0	N	0	10	A5	A1	A4	A5	A1	A4	A2	A4	A5	A5	A4	A4	A3	A5	A4	A4	A2	A4	A5	A4	A1	A2
1254	2015-02-09 13:40:08	3	fr		2015-02-09 13:40:08	2015-02-09 13:36:06	A1	19	d1	d1	d1		A2		N	0	N	0	5	A4	A1	A4	A4	A4	A3	A4	A4	A5	A2	A5	A3	A3	A4	A4	A5	A3	A3	A4	A4	A1	A1
1256	2015-02-09 13:55:39	3	fr		2015-02-09 13:55:39	2015-02-09 13:51:57	A1	22	d2	d1	d1		A2		Y	2	N	2	20	A4	A2	A5	A5	A2	A4	A5	A5	A5	A5	A4	A4	A5	A5	A4	A5	A4	A4	A5	A5	A3	A2
1257	2015-02-09 14:23:28	3	fr		2015-02-09 14:23:28	2015-02-09 14:18:18	A1	18	d2	d3	d1		A2		Y	11	N	3	5	A5	A2	A5	A5	A1	A4	A3	A5	A5	A5	A3	A4	A5	A4	A5	A4	A3	A5	A5	A5	A2	A2
1258	2015-02-09 14:29:18	3	fr		2015-02-09 14:29:18	2015-02-09 14:21:54	A1	18	d2	d1	d1		A2		N	0	N	0	8	A4	A1	A5	A5	A5	A3	A2	A3	A5	A2	A4	A3	A2	A5	A5	A3	A1	A4	A4	A5	A1	A1
1259	2015-02-09 14:36:32	3	fr		2015-02-09 14:36:32	2015-02-09 14:31:41	A1	23	d1	d1	d1		A2		N	0	N	0	8	A5	A2	A4	A3	A1	A5	A4	A4	A4	A4	A4	A2	A5	A4	A5	A5	A3	A4	A4	A3	A3	A1
1260	2015-02-09 14:45:10	3	fr		2015-02-09 14:45:10	2015-02-09 14:41:54	A1	18	d2	d1	d1		A2		N	0	N	0	6	A5	A2	A5	A5	A5	A4	A4	A5	A5	A1	A2	A5	A2	A5	A5	A4	A2	A5	A5	A4	A1	A1
1262	2015-02-09 15:12:42	3	fr		2015-02-09 15:12:42	2015-02-09 15:09:56	A1	18	d2	d1	d1		A2		Y	2	N	0	8	A5	A1	A5	A4	A1	A4	A4	A5	A4	A4	A4	A4	A4	A5	A5	A4	A1	A5	A4	A5	A2	A2
1263	2015-02-09 15:24:21	3	fr		2015-02-09 15:24:21	2015-02-09 15:20:45	A1	28	d1	d1	d1		A2		N	0	N	0	0	A4	A1	A4	A4	A1	A4	A4	A4	A4	A5	A3	A3	A1	A4	A3	A3	A1	A3	A3	A4	A1	A1
1264	2015-02-09 15:51:45	3	fr		2015-02-09 15:51:45	2015-02-09 15:42:34	A1	21	d2	d1		greque		grèce	N	13	N	0	28	A3	A1	A5	A5	A1	A5	A4	A5	A5	A5	A3	A5	A4	A5	A4	A5	A3	A5	A5	A5	A1	A1
1266	2015-02-09 15:59:08	3	fr		2015-02-09 15:59:08	2015-02-09 15:53:53	A1	18	d1	d1	d1		A4		N	0	N	0	14	A4	A1	A4	A4	A3	A4	A5	A5	A3	A4	A5	A3	A5	A4	A4	A4	A3	A5	A4	A4	A1	A3
1267	2015-02-09 16:10:13	3	fr		2015-02-09 16:10:13	2015-02-09 16:05:15	A1	18	d2	d1	d1			Cameroun	Y	2	N	0	90	A5	A1	A5	A5	A1	A4	A4	A5	A4	A5	A4	A5	A2	A5	A5	A3	A3	A5	A5	A5	A1	A2
1269	2015-02-09 17:02:33	3	fr		2015-02-09 17:02:33	2015-02-09 16:59:28	A1	18	d2	d1	d4		A2		N	0	N	0	14	A2	A4	A3	A4	A1	A4	A4	A3	A2	A5	A4	A1	A1	A4	A3	A1	A1	A1	A3	A2	A4	A4
1270	2015-02-09 17:11:31	3	fr		2015-02-09 17:11:31	2015-02-09 17:05:00	A1	19	d2	d1	d2		A2		N	0	N	0	4	A4	A3	A2	A2	A1	A3	A4	A2	A3	A5	A4	A3	A5	A4	A5	A5	A1	A5	A3	A5	A1	A5
1271	2015-02-09 17:09:13	3	fr		2015-02-09 17:09:13	2015-02-09 17:05:28	A1	19	d1	d1	d1		A2		N	5	N	5	15	A4	A1	A4	A5	A2	A5	A5	A5	A5	A4	A4	A2	A4	A5	A5	A5	A2	A5	A5	A4	A3	A1
1272	2015-02-09 17:12:27	3	fr		2015-02-09 17:12:27	2015-02-09 17:07:38	A1	21	d1	d1	d1		A2		N	0	N	0	0	A1	A5	A2	A1	A2	A2	A1	A4	A1	A1	A1	A2	A1	A1	A1	A1	A1	A1	A2	A1	A5	A5
1273	2015-02-09 17:14:16	3	fr		2015-02-09 17:14:16	2015-02-09 17:10:02	A1	22	d2	d1	d1		A2		N	0	N	0	20	A5	A2	A5	A4	A1	A3	A2	A5	A4	A5	A3	A3	A3	A5	A5	A5	A1	A5	A4	A5	A2	A4
1274	2015-02-09 17:18:17	3	fr		2015-02-09 17:18:17	2015-02-09 17:11:19	A1	23	d2	d1	d1		A2		N	0	N	0	8	A5	A1	A5	A5	A2	A5	A4	A5	A5	A4	A4	A4	A3	A5	A5	A3	A3	A5	A5	A5	A1	A2
1275	2015-02-09 17:22:49	3	fr		2015-02-09 17:22:49	2015-02-09 17:20:02	A1	19	d1	d1	d1		A2		N	4	N	0	5	A4	A3	A5	A5	A4	A3	A4	A5	A4	A3	A3	A5	A3	A5	A4	A5	A1	A5	A5	A4	A2	A2
1277	2015-02-09 18:06:26	3	fr		2015-02-09 18:06:26	2015-02-09 18:01:11	A1	20	d1	d1	d1		A2		N	0	N	0	5	A3	A4	A4	A2	A2	A3	A4	A5	A3	A2	A4	A2	A1	A5	A4	A2	A2	A3	A3	A4	A1	A2
1278	2015-02-09 18:16:36	3	fr		2015-02-09 18:16:36	2015-02-09 18:10:37	A1	24	d2	d1	d13			Guadeloupe	N	0	N	0	4	A4	A2	A3	A4	A1	A4	A4	A4	A4	A5	A4	A2	A5	A5	A5	A5	A2	A5	A5	A5	A2	A2
1279	2015-02-09 18:52:37	3	fr		2015-02-09 18:52:37	2015-02-09 18:47:49	A1	18	d1	d1	d1		A2		N	0	N	0	10	A4	A1	A3	A5	A2	A3	A4	A5	A5	A4	A4	A4	A3	A5	A4	A4	A4	A4	A5	A5	A2	A1
1280	2015-02-10 02:09:40	3	fr		2015-02-10 02:09:40	2015-02-10 02:06:44	A1	18	d1	d1	d1		A2		N	0	N	0	36	A4	A1	A5	A4	A1	A5	A5	A4	A5	A5	A3	A2	A3	A5	A5	A3	A5	A5	A5	A5	A1	A4
1281	2015-02-10 02:32:11	3	fr		2015-02-10 02:32:11	2015-02-10 02:27:17	A1	20	d1	d1	d1		A2		N	4	N	0	7	A4	A2	A4	A5	A2	A4	A5	A5	A5	A4	A5	A2	A4	A5	A5	A3	A2	A4	A4	A5	A2	A3
1282	2015-02-10 02:53:52	3	fr		2015-02-10 02:53:52	2015-02-10 02:50:51	A1	23	d1	d1	d1		A2		N	0	N	3	10	A5	A1	A4	A5	A2	A5	A3	A5	A5	A2	A4	A3	A3	A4	A3	A3	A3	A4	A4	A5	A3	A5
1283	2015-02-10 03:09:26	3	fr		2015-02-10 03:09:26	2015-02-10 03:04:02	A1	20	d1	d1	d1		A2		Y	6	N	10	3	A4	A1	A4	A4	A2	A4	A5	A5	A5	A4	A3	A4	A4	A5	A5	A5	A4	A4	A4	A5	A2	A2
1284	2015-02-10 03:09:35	3	fr		2015-02-10 03:09:35	2015-02-10 03:04:04	A1	21	d2	d1	d1		A2		Y	8	N	2	10	A4	A1	A5	A5	A4	A4	A4	A5	A5	A1	A4	A5	A4	A5	A5	A4	A4	A5	A5	A5	A1	A1
1285	2015-02-10 03:17:25	3	fr		2015-02-10 03:17:25	2015-02-10 03:15:00	A1	25	d1	d1	d10		A2		N	0	N	0	12	A5	A1	A4	A4	A3	A4	A4	A5	A5	A3	A4	A2	A1	A5	A4	A4	A2	A4	A4	A3	A1	A2
1286	2015-02-10 03:30:01	3	fr		2015-02-10 03:30:01	2015-02-10 03:26:51	A1	24	d2	d1	d1		A2		Y	3	N	0	40	A4	A2	A5	A4	A1	A4	A5	A4	A4	A5	A5	A3	A3	A5	A5	A5	A5	A4	A4	A5	A1	A1
1287	2015-02-10 03:42:21	3	fr		2015-02-10 03:42:21	2015-02-10 03:36:01	A1	21	d1	d1	d1		A1		N	0	N	0	4	A4	A2	A4	A4	A2	A4	A4	A4	A4	A4	A4	A3	A4	A4	A4	A5	A4	A4	A4	A4	A2	A2
1289	2015-02-10 03:56:28	3	fr		2015-02-10 03:56:28	2015-02-10 03:51:52	A1	21	d2	d1	d1		A2		N	0	N	0	1	A4	A3	A4	A3	A3	A4	A4	A4	A2	A2	A2	A2	A2	A4	A4	A4	A1	A3	A3	A1	A4	A5
1291	2015-02-10 04:12:23	3	fr		2015-02-10 04:12:23	2015-02-10 04:08:47	A1	21	d2	d1	d1		A2		N	0	N	0	3	A3	A2	A4	A5	A2	A4	A4	A5	A5	A4	A3	A4	A1	A4	A4	A3	A2	A4	A4	A4	A2	A2
1292	2015-02-10 04:16:38	3	fr		2015-02-10 04:16:38	2015-02-10 04:13:34	A1	21	d1	d1	d1		A2		N	0	N	0	15	A4	A2	A5	A4	A1	A5	A3	A4	A4	A5	A3	A1	A4	A4	A5	A4	A1	A3	A4	A5	A2	A4
1293	2015-02-10 04:22:23	3	fr		2015-02-10 04:22:23	2015-02-10 04:18:51	A1	24	d1	d1	d1		A2		N	0	N	0	10	A3	A1	A5	A3	A2	A2	A5	A5	A4	A4	A5	A3	A2	A5	A5	A3	A2	A3	A4	A5	A1	A2
1294	2015-02-10 04:26:22	3	fr		2015-02-10 04:26:22	2015-02-10 04:19:45	A1	22	d2	d1	d1		A2		N	0	N	0	14	A5	A1	A5	A5	A1	A5	A5	A5	A5	A5	A5	A4	A3	A5	A5	A5	A3	A5	A5	A5	A4	A4
1295	2015-02-10 04:26:51	3	fr		2015-02-10 04:26:51	2015-02-10 04:21:14	A1	22	d2	d1	d1		A2		N	4	N	1	4	A4	A1	A3	A4	A1	A4	A5	A5	A5	A5	A5	A3	A5	A5	A5	A4	A4	A4	A4	A5	A1	A2
1297	2015-02-10 04:27:52	3	fr		2015-02-10 04:27:52	2015-02-10 04:24:20	A1	19	d1	d1	d1		A2		N	0	N	0	10	A4	A1	A2	A3	A2	A4	A3	A2	A5	A4	A4	A1	A4	A5	A5	A2	A1	A4	A4	A5	A2	A5
1298	2015-02-10 04:42:06	3	fr		2015-02-10 04:42:06	2015-02-10 04:37:02	A1	24	d2	d1	d1		A2		N	0	N	0	7	A3	A1	A4	A5	A1	A3	A3	A4	A5	A3	A5	A4	A3	A5	A5	A4	A3	A3	A4	A4	A4	A3
1299	2015-02-10 04:59:27	3	fr		2015-02-10 04:59:27	2015-02-10 04:56:21	A1	21	d1	d1	d1		A2		N	3	N	0	12	A3	A2	A4	A4	A2	A4	A4	A4	A4	A3	A4	A3	A2	A4	A2	A5	A1	A4	A3	A2	A2	A3
1300	2015-02-10 05:20:22	3	fr		2015-02-10 05:20:22	2015-02-10 05:16:49	A1	18	d1	d1	d1		A2		N	0	N	0	7	A4	A1	A5	A4	A3	A4	A5	A5	A5	A3	A4	A2	A3	A5	A5	A4	A2	A5	A5	A4	A1	A1
1302	2015-02-10 05:57:15	3	fr		2015-02-10 05:57:15	2015-02-10 05:53:19	A1	21	d1	d1	d1		A2		N	0	N	0	10	A5	A1	A5	A4	A4	A5	A5	A5	A4	A4	A5	A2	A4	A5	A2	A4	A5	A5	A5	A4	A1	A1
1303	2015-02-10 06:07:51	3	fr		2015-02-10 06:07:51	2015-02-10 06:04:11	A1	20	d2	d1	d1		A2		N	4	N	0	4	A4	A4	A3	A2	A2	A2	A2	A2	A2	A4	A2	A2	A3	A4	A4	A3	A1	A2	A2	A4	A2	A2
1304	2015-02-10 07:00:45	3	fr		2015-02-10 07:00:45	2015-02-10 06:57:44	A1	21	d1	d1	d1		A2		Y	6	N	12	20	A4	A1	A4	A5	A3	A4	A5	A4	A5	A1	A5	A4	A5	A3	A4	A4	A1	A4	A5	A5	A1	A1
1305	2015-02-10 07:24:40	3	fr		2015-02-10 07:24:40	2015-02-10 07:21:24	A1	23	d2	d1	d1		A2		N	7	N	0	6	A5	A2	A4	A4	A1	A3	A4	A5	A4	A4	A3	A3	A2	A2	A5	A5	A4	A2	A4	A4	A4	A1
1306	2015-02-10 07:41:29	3	fr		2015-02-10 07:41:29	2015-02-10 07:36:12	A1	21	d2	d1	d1		A2		N	0	N	0	4	A4	A1	A5	A5	A1	A3	A2	A4	A4	A4	A3	A2	A4	A4	A4	A3	A2	A3	A4	A4	A1	A1
1307	2015-02-10 07:50:38	3	fr		2015-02-10 07:50:38	2015-02-10 07:47:47	A1	24	d2	d1	d1		A2		N	7	N	0	10	A4	A2	A4	A5	A1	A4	A3	A4	A4	A4	A4	A3	A3	A4	A3	A4	A1	A2	A4	A4	A1	A1
1309	2015-02-10 08:07:57	3	fr		2015-02-10 08:07:57	2015-02-10 08:04:18	A1	20	d2	d1	d1		A2		N	6	N	0	40	A4	A1	A4	A5	A2	A3	A4	A5	A5	A3	A4	A5	A2	A4	A5	A5	A4	A5	A4	A4	A2	A1
1310	2015-02-10 08:28:47	3	fr		2015-02-10 08:28:47	2015-02-10 08:26:03	A1	23	d1	d1	d1		A2		N	0	N	0	50	A4	A1	A5	A4	A5	A4	A4	A4	A4	A1	A4	A3	A3	A4	A2	A3	A1	A4	A4	A3	A1	A2
1313	2015-02-10 08:56:12	3	fr		2015-02-10 08:56:12	2015-02-10 08:53:17	A1	20	d1	d1	d1		A2		N	0	N	0	35	A4	A1	A4	A5	A3	A3	A4	A5	A4	A3	A5	A3	A2	A4	A2	A5	A3	A5	A5	A4	A2	A4
1314	2015-02-10 09:00:31	3	fr		2015-02-10 09:00:31	2015-02-10 08:56:00	A1	18	d2	d1	d1		A2		N	0	N	0	15	A5	A1	A5	A5	A2	A4	A5	A5	A5	A4	A5	A5	A5	A5	A5	A4	A3	A5	A5	A5	A2	A2
1315	2015-02-10 09:37:11	3	fr		2015-02-10 09:37:11	2015-02-10 09:33:31	A1	19	d2	d1	d1		A2		N	0	N	0	2	A3	A4	A4	A3	A4	A3	A5	A3	A4	A2	A3	A2	A3	A4	A4	A3	A1	A2	A4	A4	A2	A2
1316	2015-02-10 09:41:10	3	fr		2015-02-10 09:41:10	2015-02-10 09:37:07	A1	38	d2	d2	d1		A2		Y	4	N	0	10	A4	A2	A5	A5	A2	A3	A4	A5	A4	A3	A2	A3	A2	A5	A4	A4	A2	A4	A4	A4	A2	A2
1319	2015-02-10 10:05:13	3	fr		2015-02-10 10:05:13	2015-02-10 09:48:48	A1	18	d2	d1	d1		A2		Y	9	N	0	10	A5	A1	A5	A4	A1	A3	A4	A5	A4	A4	A5	A5	A2	A3	A5	A4	A1	A5	A4	A4	A1	A5
1320	2015-02-10 09:57:53	3	fr		2015-02-10 09:57:53	2015-02-10 09:54:39	A1	34	d1	d1	d1			Cameroun	N	0	N	0	28	A4	A1	A4	A5	A1	A3	A4	A5	A4	A5	A3	A5	A3	A4	A4	A4	A2	A5	A5	A5	A1	A2
1323	2015-02-10 10:16:34	3	fr		2015-02-10 10:16:34	2015-02-10 10:13:44	A1	21	d2	d1	d1		A2		N	0	N	0	10	A5	A2	A5	A4	A1	A4	A3	A5	A4	A5	A4	A5	A4	A5	A4	A4	A3	A4	A4	A4	A3	A2
1324	2015-02-10 10:46:33	3	fr		2015-02-10 10:46:33	2015-02-10 10:41:47	A1	22	d1	d1	d1		A2		N	0	N	0	5	A4	A2	A5	A2	A5	A4	A2	A4	A4	A1	A3	A1	A1	A2	A2	A3	A2	A3	A3	A2	A4	A2
1326	2015-02-10 11:09:38	3	fr		2015-02-10 11:09:38	2015-02-10 11:06:10	A1	22	d2	d1	d1		A2		N	0	N	0	74	A4	A1	A5	A5	A4	A2	A4	A5	A5	A2	A4	A5	A1	A5	A5	A2	A1	A4	A5	A2	A1	A4
1327	2015-02-10 11:49:34	3	fr		2015-02-10 11:49:34	2015-02-10 11:45:39	A1	19	d2	d1	d1		A2		N	0	N	2	6	A5	A2	A3	A5	A2	A2	A4	A5	A5	A5	A4	A4	A4	A5	A5	A5	A1	A5	A4	A5	A4	A2
1328	2015-02-10 11:55:03	3	fr		2015-02-10 11:55:03	2015-02-10 11:49:26	A1	21	d1	d1	d1		A2		N	0	N	0	8	A3	A1	A5	A4	A2	A5	A4	A4	A4	A4	A2	A3	A4	A5	A5	A4	A2	A1	A4	A4	A4	A2
1330	2015-02-10 12:32:21	3	fr		2015-02-10 12:32:21	2015-02-10 12:27:51	A1	22	d2	d1	d1		A2		N	0	N	0	9	A5	A1	A5	A5	A1	A5	A4	A5	A5	A5	A4	A5	A4	A5	A4	A5	A2	A5	A5	A5	A2	A2
1331	2015-02-10 12:38:24	3	fr		2015-02-10 12:38:24	2015-02-10 12:34:41	A1	18	d2	d3	d1		A2		Y	3	N	0	21	A5	A1	A5	A5	A1	A4	A3	A5	A3	A5	A4	A5	A5	A5	A5	A5	A1	A5	A5	A5	A3	A4
1333	2015-02-10 13:25:06	3	fr		2015-02-10 13:25:06	2015-02-10 13:22:13	A1	18	d2	d1	d1		A2		Y	2	N	0	18	A2	A1	A4	A4	A2	A2	A2	A4	A4	A3	A2	A1	A1	A5	A4	A3	A1	A1	A4	A3	A4	A4
1335	2015-02-10 15:14:21	3	fr		2015-02-10 15:14:21	2015-02-10 15:04:40	A1	35	d2	d1	d1		A2		N	0	N	0	1	A4	A4	A4	A2	A3	A2	A2	A4	A4	A4	A2	A4	A4	A3	A4	A3	A1	A4	A4	A3	A3	A2
1336	2015-02-10 15:23:19	3	fr		2015-02-10 15:23:19	2015-02-10 15:18:23	A1	19	d1	d1	d1		A2		N	0	N	0	5	A4	A2	A4	A5	A5	A3	A3	A4	A4	A1	A5	A4	A1	A4	A3	A1	A1	A4	A4	A2	A3	A3
1340	2015-02-10 17:33:51	3	fr		2015-02-10 17:33:51	2015-02-10 17:30:47	A1	19	d1	d1	d1		A2		N	2	N	3	20	A3	A1	A4	A5	A3	A4	A4	A5	A5	A3	A5	A3	A3	A5	A4	A1	A1	A5	A3	A5	A3	A1
1342	2015-02-11 02:23:43	3	fr		2015-02-11 02:23:43	2015-02-11 02:17:14	A1	21	d2	d1	d1		A2		N	0	N	0	126	A5	A1	A4	A5	A1	A5	A5	A5	A5	A5	A4	A2	A3	A5	A5	A2	A1	A5	A5	A5	A2	A1
1343	2015-02-11 02:43:03	3	fr		2015-02-11 02:43:03	2015-02-11 02:36:16	A1	21	d2	d1	d1		A2		N	2	N	0	20	A4	A2	A5	A4	A4	A2	A3	A4	A4	A2	A2	A2	A1	A5	A5	A3	A1	A2	A4	A4	A2	A2
1346	2015-02-11 03:00:30	3	fr		2015-02-11 03:00:30	2015-02-11 02:52:07	A1	20	d2	d1	d1		A2		N	0	N	0	2	A3	A3	A5	A5	A3	A2	A1	A5	A5	A4	A1	A5	A4	A4	A4	A3	A2	A4	A4	A4	A2	A2
1348	2015-02-11 04:29:48	3	fr		2015-02-11 04:29:48	2015-02-11 04:24:30	A1	24	d2	d1	d1		A2		N	0	N	0	14	A4	A1	A4	A3	A1	A5	A5	A5	A4	A5	A5	A5	A2	A4	A5	A3	A3	A5	A4	A5	A2	A2
1349	2015-02-11 04:38:21	3	fr		2015-02-11 04:38:21	2015-02-11 04:34:12	A1	21	d1	d1	d1		A2		N	4	N	0	55	A4	A1	A5	A5	A3	A4	A5	A5	A5	A3	A5	A5	A5	A5	A5	A3	A1	A5	A4	A5	A2	A2
1351	2015-02-11 05:03:36	3	fr		2015-02-11 05:03:36	2015-02-11 05:00:59	A1	20	d2	d1	d1		A2		N	5	N	0	7	A5	A2	A5	A3	A1	A4	A4	A5	A3	A5	A5	A3	A4	A4	A3	A5	A3	A4	A4	A4	A2	A1
1353	2015-02-11 05:27:02	3	fr		2015-02-11 05:27:02	2015-02-11 05:20:53	A1	20	d1	d1	d1		A2		Y	9	N	2	14	A5	A2	A5	A5	A2	A4	A5	A5	A5	A5	A4	A3	A5	A5	A4	A4	A3	A4	A4	A5	A2	A1
1356	2015-02-11 06:56:49	3	fr		2015-02-11 06:56:49	2015-02-11 06:54:04	A1	22	d1	d1	d1		A2		N	0	N	0	6	A5	A1	A4	A5	A2	A4	A5	A3	A4	A2	A4	A1	A3	A5	A4	A3	A3	A4	A4	A4	A2	A3
1357	2015-02-11 07:59:06	3	fr		2015-02-11 07:59:06	2015-02-11 07:54:18	A1	20	d1	d1	d1		A2		N	0	N	0	15	A4	A2	A5	A4	A3	A4	A3	A5	A5	A3	A2	A4	A5	A4	A5	A5	A2	A5	A3	A5	A2	A3
1358	2015-02-11 08:58:16	3	fr		2015-02-11 08:58:16	2015-02-11 08:54:49	A1	27	d2	d1	d1		A2		N	0	N	0	14	A4	A2	A3	A3	A2	A4	A5	A4	A4	A3	A4	A2	A1	A4	A1	A4	A3	A5	A3	A1	A2	A4
1359	2015-02-11 09:23:11	3	fr		2015-02-11 09:23:11	2015-02-11 09:18:57	A1	21	d1	d1	d1		A2		N	0	N	0	0	A3	A4	A3	A1	A1	A4	A3	A4	A2	A5	A3	A3	A1	A2	A4	A4	A1	A3	A4	A4	A2	A2
1360	2015-02-11 09:34:53	3	fr		2015-02-11 09:34:53	2015-02-11 09:31:22	A1	24	d2	d1	d1		A2		N	0	N	0	15	A4	A2	A5	A3	A1	A4	A4	A5	A5	A5	A4	A5	A4	A4	A5	A5	A3	A5	A3	A5	A1	A2
1361	2015-02-11 09:48:07	3	fr		2015-02-11 09:48:07	2015-02-11 09:45:03	A1	25	d2	d1	d1		A2		N	10	N	0	7	A4	A1	A5	A5	A5	A4	A3	A5	A4	A5	A2	A5	A4	A5	A5	A4	A2	A4	A4	A5	A2	A5
1363	2015-02-11 10:50:58	3	fr		2015-02-11 10:50:58	2015-02-11 10:46:38	A1	18	d2	d1	d1		A2		N	7	N	1	20	A5	A1	A5	A5	A2	A5	A5	A5	A5	A4	A5	A5	A4	A5	A5	A4	A3	A5	A5	A5	A1	A2
1365	2015-02-11 11:11:24	3	fr		2015-02-11 11:11:24	2015-02-11 11:06:55	A1	25	d1	d1		Tamoul	A2		N	0	N	0	3	A4	A3	A4	A4	A4	A3	A3	A4	A4	A2	A4	A4	A3	A2	A4	A3	A2	A3	A3	A3	A4	A3
1366	2015-02-11 11:26:24	3	fr		2015-02-11 11:26:24	2015-02-11 11:18:51	A1	18	d2	d3	d1		A2		N	0	N	0	7	A5	A3	A5	A4	A2	A4	A5	A5	A3	A3	A3	A5	A3	A4	A4	A4	A2	A3	A4	A5	A1	A1
1369	2015-02-11 12:25:26	3	fr		2015-02-11 12:25:26	2015-02-11 12:21:47	A1	21	d2	d1	d1		A2		N	0	N	0	7	A4	A1	A5	A5	A3	A3	A4	A4	A5	A4	A4	A3	A4	A5	A5	A3	A1	A3	A4	A4	A2	A3
1372	2015-02-11 13:03:01	3	fr		2015-02-11 13:03:01	2015-02-11 13:00:06	A1	18	d1	d1	d1		A2		Y	5	N	3	40	A3	A1	A5	A5	A3	A4	A4	A5	A4	A3	A5	A5	A4	A5	A4	A5	A5	A4	A5	A3	A1	A1
1375	2015-02-11 15:24:31	3	fr		2015-02-11 15:24:31	2015-02-11 15:21:47	A1	22	d2	d1	d1		A2		N	1	N	2	15	A5	A1	A4	A5	A1	A5	A3	A4	A4	A4	A4	A4	A4	A5	A4	A4	A2	A3	A4	A4	A1	A1
1378	2015-02-11 16:01:29	3	fr		2015-02-11 16:01:29	2015-02-11 15:57:46	A1	21	d1	d1	d1		A2		N	0	N	1	20	A4	A1	A4	A5	A1	A5	A4	A5	A4	A5	A4	A4	A4	A5	A5	A4	A5	A4	A4	A5	A2	A1
1379	2015-02-11 16:40:31	3	fr		2015-02-11 16:40:31	2015-02-11 16:37:35	A1	23	d1	d1	d1		A2		N	0	N	0	20	A4	A1	A5	A5	A1	A4	A4	A5	A5	A4	A5	A5	A3	A5	A5	A5	A1	A5	A5	A4	A1	A4
1380	2015-02-11 17:12:53	3	fr		2015-02-11 17:12:53	2015-02-11 17:08:25	A1	222	d2	d1	d1		A2		N	0	N	0	15	A4	A2	A5	A2	A1	A4	A5	A4	A5	A4	A3	A1	A1	A5	A5	A4	A2	A4	A4	A3	A1	A2
1382	2015-02-12 04:10:02	3	fr		2015-02-12 04:10:02	2015-02-12 04:06:40	A1	23	d1	d1	d1		A2		N	0	N	0	18	A4	A1	A5	A5	A1	A4	A4	A5	A5	A4	A4	A2	A2	A5	A3	A4	A2	A4	A4	A4	A1	A1
1383	2015-02-12 06:58:43	3	fr		2015-02-12 06:58:43	2015-02-12 06:55:10	A1	21	d1	d1	d1		A2		N	0	N	0	10	A4	A2	A4	A5	A2	A4	A3	A5	A5	A4	A4	A3	A3	A5	A5	A3	A2	A4	A5	A5	A2	A1
1384	2015-02-12 07:32:05	3	fr		2015-02-12 07:32:05	2015-02-12 07:29:57	A1	22	d2	d1	d1		A2		N	2	N	0	4	A4	A2	A5	A5	A1	A4	A4	A5	A5	A5	A3	A3	A2	A5	A4	A3	A1	A4	A5	A5	A2	A5
1385	2015-02-12 07:52:02	3	fr		2015-02-12 07:52:02	2015-02-12 07:49:22	A1	22	d2	d1	d1		A2		N	0	N	0	6	A4	A2	A4	A4	A5	A3	A4	A5	A4	A2	A3	A4	A3	A4	A4	A3	A1	A3	A4	A4	A2	A3
1386	2015-02-12 08:51:09	3	fr		2015-02-12 08:51:09	2015-02-12 08:46:52	A1	21	d2	d1	d1		A2		N	0	N	0	15	A4	A1	A3	A4	A3	A5	A4	A4	A5	A5	A3	A2	A4	A5	A5	A5	A4	A4	A4	A5	A1	A1
1387	2015-02-12 09:58:39	3	fr		2015-02-12 09:58:39	2015-02-12 09:55:30	A1	24	d2	d1	d1		A2		N	0	N	0	1	A4	A5	A3	A1	A1	A1	A4	A5	A3	A4	A2	A1	A2	A1	A4	A2	A3	A5	A3	A4	A2	A2
1388	2015-02-12 10:41:06	3	fr		2015-02-12 10:41:06	2015-02-12 10:36:45	A1	23	d2	d1	d1		A2		Y	10	N	0	6	A4	A2	A5	A4	A1	A4	A4	A5	A5	A5	A2	A5	A4	A5	A4	A3	A3	A5	A5	A4	A3	A1
1389	2015-02-12 11:09:48	3	fr		2015-02-12 11:09:48	2015-02-12 11:06:35	A1	25	d2	d1	d1		A2		N	5	N	1	2	A4	A3	A5	A4	A2	A3	A2	A5	A5	A4	A2	A3	A5	A5	A4	A3	A1	A3	A5	A4	A2	A1
1390	2015-02-12 12:09:31	3	fr		2015-02-12 12:09:31	2015-02-12 12:02:55	A1	18	d1	d1	d1		A2		N	0	N	0	8	A5	A3	A4	A5	A2	A5	A5	A4	A4	A3	A3	A1	A3	A5	A4	A4	A2	A4	A4	A4	A2	A4
1391	2015-02-12 12:48:52	3	fr		2015-02-12 12:48:52	2015-02-12 12:42:35	A1	20	d2	d1	d1		A2		N	0	N	0	0	A4	A5	A5	A3	A1	A4	A2	A5	A2	A3	A1	A5	A1	A1	A1	A4	A1	A5	A1	A2	A4	A2
1393	2015-02-12 15:10:45	3	fr		2015-02-12 15:10:45	2015-02-12 15:02:39	A1	40	d2	d1	d1		A2		N	0	N	0	7	A4	A2	A5	A3	A1	A4	A4	A5	A4	A4	A2	A4	A4	A4	A4	A5	A1	A3	A4	A4	A1	A1
1394	2015-02-12 16:58:20	3	fr		2015-02-12 16:58:20	2015-02-12 15:06:22	A1	18	d2	d1	d1		A2		Y	8	N	2	20	A5	A1	A4	A5	A1	A4	A3	A4	A4	A4	A3	A4	A2	A5	A5	A3	A1	A4	A4	A5	A1	A1
1395	2015-02-12 19:14:55	3	fr		2015-02-12 19:14:55	2015-02-12 19:10:46	A1	22	d2	d1	d1		A2		N	0	N	0	3	A5	A2	A4	A2	A4	A4	A3	A4	A5	A2	A2	A2	A2	A4	A4	A4	A1	A4	A4	A4	A4	A2
1396	2015-02-13 02:02:32	3	fr		2015-02-13 02:02:32	2015-02-13 01:59:48	A1	20	d1	d1	d1		A2		N	0	N	0	10	A5	A1	A3	A5	A2	A4	A5	A3	A4	A4	A5	A2	A2	A4	A4	A4	A4	A3	A4	A4	A2	A4
1398	2015-02-13 07:02:45	3	fr		2015-02-13 07:02:45	2015-02-13 06:55:06	A1	21	d2	d1	d1		A2		N	1	N	0	1	A4	A2	A5	A5	A2	A5	A3	A5	A4	A4	A3	A5	A3	A4	A5	A3	A2	A5	A5	A5	A2	A4
1400	2015-02-13 07:53:25	3	fr		2015-02-13 07:53:25	2015-02-13 07:50:16	A1	19	d2	d1	d10		A2		Y	5	N	0	10	A4	A1	A4	A5	A2	A2	A3	A4	A4	A4	A3	A5	A4	A3	A4	A4	A3	A4	A5	A4	A1	A1
1401	2015-02-13 09:25:50	3	fr		2015-02-13 09:25:50	2015-02-13 09:16:14	A1	20	d1	d1	d1		A2		Y	5	N	10	7	A5	A2	A5	A2	A2	A4	A4	A5	A3	A2	A2	A5	A5	A5	A2	A3	A4	A5	A3	A2	A1	A1
1402	2015-02-13 10:37:15	3	fr		2015-02-13 10:37:15	2015-02-13 10:30:06	A1	24	d1	d1	d1		A2		N	0	N	0	21	A5	A1	A4	A4	A3	A4	A5	A5	A4	A3	A4	A4	A3	A5	A5	A4	A3	A5	A4	A5	A3	A3
1403	2015-02-13 12:46:35	3	fr		2015-02-13 12:46:35	2015-02-13 12:42:56	A1	20	d2	d1	d1		A2		N	2	N	0	15	A4	A1	A5	A5	A4	A4	A4	A5	A5	A2	A4	A2	A4	A4	A5	A1	A1	A5	A5	A5	A2	A4
1404	2015-02-13 13:28:15	3	fr		2015-02-13 13:28:15	2015-02-13 13:25:03	A1	20	d1	d1	d1		A2		N	0	N	0	20	A4	A1	A4	A3	A3	A3	A4	A4	A3	A3	A4	A2	A3	A4	A5	A3	A2	A5	A3	A5	A2	A2
1406	2015-02-13 16:10:58	3	fr		2015-02-13 16:10:58	2015-02-13 16:08:22	A1	23	d2	d1	d1		A2		N	0	N	0	5	A4	A2	A4	A5	A2	A3	A4	A5	A5	A4	A4	A4	A5	A4	A5	A5	A3	A4	A5	A5	A3	A1
1407	2015-02-14 06:19:05	3	fr		2015-02-14 06:19:05	2015-02-14 06:15:06	A1	19	d2	d1	d1		A2		N	2	N	1	7	A4	A1	A5	A5	A1	A4	A4	A4	A5	A5	A3	A2	A4	A4	A4	A4	A2	A2	A4	A5	A1	A1
1408	2015-02-14 06:22:04	3	fr		2015-02-14 06:22:04	2015-02-14 06:18:20	A1	27	d2	d1	d1		A2		N	1	N	0	7	A5	A1	A5	A5	A1	A5	A3	A5	A5	A5	A2	A4	A3	A4	A5	A5	A1	A4	A5	A5	A2	A2
1410	2015-02-14 08:58:31	3	fr		2015-02-14 08:58:31	2015-02-14 08:54:17	A1	26	d2	d1	d1		A2		N	0	N	1	2	A4	A4	A4	A4	A1	A4	A3	A5	A4	A5	A2	A3	A4	A4	A4	A3	A1	A4	A4	A4	A1	A2
1411	2015-02-14 11:38:05	3	fr		2015-02-14 11:38:05	2015-02-14 11:02:00	A1	21	d2	d1	d1		A2		N	0	N	0	60	A4	A1	A4	A5	A1	A3	A5	A5	A5	A5	A4	A5	A3	A5	A4	A5	A5	A5	A5	A5	A2	A2
1413	2015-02-14 15:32:48	3	fr		2015-02-14 15:32:48	2015-02-14 15:29:44	A1	18	d1	d1	d1		A2		N	0	N	0	14	A5	A1	A5	A3	A3	A5	A4	A5	A5	A2	A5	A5	A3	A5	A5	A4	A1	A5	A5	A5	A1	A1
1414	2015-02-15 06:09:44	3	fr		2015-02-15 06:09:44	2015-02-15 06:05:04	A1	22	d1	d1	d1		A2		Y	3	N	2	15	A4	A1	A5	A4	A2	A4	A4	A5	A5	A4	A4	A5	A4	A5	A5	A4	A4	A5	A5	A5	A1	A1
1415	2015-02-15 08:24:01	3	fr		2015-02-15 08:24:01	2015-02-15 08:20:35	A1	22	d2	d1	d1		A2		Y	7	N	0	14	A4	A2	A5	A5	A2	A2	A4	A4	A4	A4	A5	A1	A2	A5	A1	A4	A1	A4	A4	A2	A1	A1
1417	2015-02-15 12:08:10	3	fr		2015-02-15 12:08:10	2015-02-15 12:02:42	A1	34	d2	d1	d1		A2		N	5	N	1	3	A4	A2	A5	A4	A1	A4	A4	A5	A5	A4	A2	A4	A3	A4	A4	A5	A1	A4	A4	A4	A4	A2
1418	2015-02-15 12:28:03	3	fr		2015-02-15 12:28:03	2015-02-15 12:25:24	A1	18	d2	d1	d1		A2		N	0	N	0	2	A5	A2	A5	A5	A1	A5	A4	A5	A5	A4	A3	A5	A5	A5	A5	A5	A1	A5	A5	A5	A2	A1
1419	2015-02-15 13:43:21	3	fr		2015-02-15 13:43:21	2015-02-15 13:00:41	A1	19	d2	d1	d1		A2		N	13	N	1	12	A5	A1	A5	A5	A1	A5	A3	A5	A5	A5	A5	A5	A3	A5	A5	A5	A1	A5	A5	A5	A3	A1
1420	2015-02-15 13:29:52	3	fr		2015-02-15 13:29:52	2015-02-15 13:25:56	A1	18	d1	d1	d1		A2		N	9	N	1	6	A4	A2	A5	A5	A2	A5	A4	A5	A5	A4	A3	A1	A4	A5	A5	A4	A4	A5	A5	A5	A2	A1
1421	2015-02-15 13:53:27	3	fr		2015-02-15 13:53:27	2015-02-15 13:48:05	A1	19	d2	d1	d1		A2		Y	12	N	1	6	A4	A1	A5	A5	A1	A3	A4	A5	A5	A5	A4	A2	A4	A4	A5	A3	A2	A4	A4	A5	A2	A1
1422	2015-02-15 15:35:29	3	fr		2015-02-15 15:35:29	2015-02-15 15:31:28	A1	20	d2	d1	d1		A2		Y	12	N	1	2	A4	A1	A5	A5	A2	A3	A4	A5	A5	A3	A4	A5	A4	A5	A4	A3	A3	A5	A5	A4	A1	A1
1423	2015-02-16 03:44:40	3	fr		2015-02-16 03:44:40	2015-02-16 03:25:34	A1	20	d2	d1	d1		A2		N	0	N	0	16	A5	A1	A5	A5	A1	A4	A5	A5	A5	A5	A5	A5	A3	A5	A4	A4	A4	A5	A5	A5	A2	A3
1424	2015-02-16 06:36:55	3	fr		2015-02-16 06:36:55	2015-02-16 06:31:55	A1	22	d2	d1	d1		A2		N	0	N	0	7	A4	A2	A4	A4	A3	A3	A2	A4	A4	A4	A2	A2	A2	A4	A2	A4	A2	A2	A4	A3	A3	A3
1425	2015-02-16 06:51:49	3	fr		2015-02-16 06:51:49	2015-02-16 06:45:07	A1	23	d1	d1	d1		A2		Y	5	N	2	1	A4	A5	A3	A3	A3	A5	A4	A4	A4	A2	A2	A3	A4	A5	A1	A1	A2	A5	A5	A3	A1	A1
1426	2015-02-16 06:49:25	3	fr		2015-02-16 06:49:25	2015-02-16 06:45:48	A1	20	d2	d1	d1		A2		N	4	N	0	4	A3	A4	A4	A5	A2	A2	A2	A4	A4	A1	A3	A4	A1	A4	A3	A3	A1	A2	A3	A3	A2	A2
1427	2015-02-16 07:01:11	3	fr		2015-02-16 07:01:11	2015-02-16 06:58:53	A1	21	d2	d1	d1		A2		Y	2	N	0	10	A5	A1	A3	A5	A2	A4	A4	A4	A4	A4	A4	A4	A3	A5	A4	A5	A3	A4	A4	A5	A2	A4
1428	2015-02-16 09:22:36	3	fr		2015-02-16 09:22:36	2015-02-16 09:19:40	A1	19	d1	d1	d1		A2		N	0	N	2	8	A5	A1	A5	A5	A1	A5	A4	A5	A5	A4	A4	A3	A4	A4	A2	A4	A3	A4	A4	A5	A2	A2
1429	2015-02-16 09:41:32	3	fr		2015-02-16 09:41:32	2015-02-16 09:39:38	A1	35	d1	d1	d1		A2		N	8	N	2	12	A4	A2	A5	A4	A1	A2	A4	A5	A5	A4	A4	A5	A4	A4	A3	A5	A3	A4	A4	A4	A2	A1
1430	2015-02-16 09:55:41	3	fr		2015-02-16 09:55:41	2015-02-16 09:53:01	A1	19	d2	d1	d1		A2		Y	12	N	3	5	A5	A1	A5	A5	A3	A5	A4	A5	A5	A4	A4	A5	A5	A5	A5	A4	A4	A5	A5	A4	A2	A1
1431	2015-02-16 11:44:03	3	fr		2015-02-16 11:44:03	2015-02-16 11:37:48	A1	18	d2	d1	d1		A2		N	0	N	5	25	A4	A1	A5	A5	A4	A3	A2	A5	A5	A2	A5	A5	A4	A3	A5	A1	A1	A5	A4	A5	A2	A1
1432	2015-02-16 16:29:45	3	fr		2015-02-16 16:29:45	2015-02-16 16:24:29	A1	21	d2	d1	d1		A2		N	3	N	0	7	A3	A3	A4	A5	A2	A2	A3	A5	A4	A3	A2	A5	A3	A5	A2	A1	A1	A4	A4	A2	A2	A1
1433	2015-02-16 16:58:33	3	fr		2015-02-16 16:58:33	2015-02-16 16:54:36	A1	22	d2	d1	d1		A2		N	0	N	0	18	A5	A1	A4	A4	A3	A4	A4	A4	A4	A3	A3	A1	A2	A3	A4	A3	A2	A4	A4	A3	A3	A4
1435	2015-02-17 06:46:45	3	fr		2015-02-17 06:46:45	2015-02-17 06:44:23	A1	22	d2	d1	d1		A2		N	0	N	0	10	A4	A1	A5	A4	A1	A2	A3	A5	A5	A4	A2	A5	A3	A3	A4	A3	A1	A5	A4	A4	A2	A2
1436	2015-02-17 07:43:24	3	fr		2015-02-17 07:43:24	2015-02-17 07:40:00	A1	30	d2	d1	d1		A2		N	3	N	0	5	A4	A2	A5	A4	A3	A4	A2	A4	A5	A4	A2	A3	A4	A4	A5	A4	A2	A4	A5	A4	A2	A2
1437	2015-02-17 10:07:25	3	fr		2015-02-17 10:07:25	2015-02-17 10:02:46	A1	35	d2	d1	d1		A2		N	0	N	0	4	A5	A3	A3	A4	A1	A5	A4	A5	A4	A4	A2	A4	A4	A4	A5	A4	A1	A4	A3	A4	A2	A2
1438	2015-02-17 10:53:00	3	fr		2015-02-17 10:53:00	2015-02-17 10:49:38	A1	21	d1	d1		indien		madagascar	N	0	N	2	4	A3	A2	A4	A4	A2	A3	A2	A4	A5	A4	A2	A4	A4	A5	A4	A4	A2	A4	A4	A4	A2	A4
1439	2015-02-17 11:53:46	3	fr		2015-02-17 11:53:46	2015-02-17 11:49:34	A1	23	d2	d1	d1		A2		N	0	N	0	3	A4	A3	A4	A4	A2	A3	A3	A5	A4	A4	A3	A4	A4	A4	A4	A4	A2	A4	A4	A3	A2	A2
1441	2015-02-18 04:27:05	3	fr		2015-02-18 04:27:05	2015-02-18 04:23:17	A1	21	d2	d1	d1		A2		N	0	N	0	7	A5	A2	A5	A5	A2	A4	A4	A5	A4	A4	A2	A4	A2	A5	A5	A5	A1	A5	A5	A5	A4	A3
1442	2015-02-18 06:20:13	3	fr		2015-02-18 06:20:13	2015-02-18 06:15:01	A1	22	d1	d1	d1		A2		Y	2	N	3	10	A4	A1	A5	A5	A2	A4	A4	A5	A4	A4	A4	A5	A5	A5	A4	A5	A3	A4	A4	A5	A2	A2
1443	2015-02-18 09:28:37	3	fr		2015-02-18 09:28:37	2015-02-18 09:23:01	A1	23	d2	d1	d1		A2		Y	13	N	1	21	A4	A1	A5	A4	A3	A4	A4	A5	A5	A3	A4	A4	A4	A5	A5	A4	A3	A5	A5	A5	A1	A1
1444	2015-02-18 11:25:32	3	fr		2015-02-18 11:25:32	2015-02-18 11:08:38	A1	20	d2	d1	d1		A2		N	6	N	2	7	A4	A1	A4	A5	A1	A4	A2	A4	A5	A5	A2	A5	A4	A5	A5	A4	A2	A4	A5	A5	A1	A2
1445	2015-02-18 12:24:47	3	fr		2015-02-18 12:24:47	2015-02-18 12:20:22	A1	23	d2	d1	d1		A2		N	9	N	0	25	A3	A1	A3	A5	A2	A4	A5	A5	A5	A3	A3	A2	A1	A3	A4	A4	A5	A3	A2	A4	A2	A1
1447	2015-02-19 07:02:00	3	fr		2015-02-19 07:02:00	2015-02-19 06:56:56	A1	20	d1	d1	d1		A2		N	0	N	0	0	A3	A1	A4	A4	A1	A4	A4	A4	A5	A5	A4	A3	A1	A5	A4	A4	A1	A3	A5	A5	A3	A2
1448	2015-02-20 05:12:52	3	fr		2015-02-20 05:12:52	2015-02-20 05:07:31	A1	20	d2	d1	d1		A2		Y	4	N	0	10	A4	A2	A5	A4	A1	A3	A3	A5	A3	A4	A2	A4	A4	A5	A4	A5	A2	A5	A4	A4	A2	A2
1449	2015-02-20 08:34:07	3	fr		2015-02-20 08:34:07	2015-02-20 08:25:19	A1	18	d2	d1	d1		A2		N	0	N	0	1	A2	A4	A3	A4	A4	A2	A3	A2	A5	A2	A2	A1	A1	A5	A2	A3	A1	A2	A4	A2	A4	A4
1450	2015-02-21 06:31:14	3	fr		2015-02-21 06:31:14	2015-02-21 06:23:41	A1	24	d1	d1	d1		A2		N	4	N	0	3	A3	A4	A4	A4	A5	A2	A4	A4	A3	A1	A1	A1	A2	A4	A5	A3	A1	A3	A1	A4	A2	A1
1452	2015-02-22 16:17:33	3	fr		2015-02-22 16:17:33	2015-02-22 16:08:57	A1	21	d2	d1	d1		A2		N	0	N	0	7	A4	A1	A5	A5	A5	A4	A4	A5	A5	A1	A3	A5	A4	A5	A5	A3	A2	A5	A5	A4	A3	A2
1454	2015-02-23 09:26:12	3	fr		2015-02-23 09:26:12	2015-02-23 09:21:02	A1	19	d2	d1	d1		A2		Y	10	N	2	7	A5	A1	A5	A3	A1	A4	A4	A4	A5	A5	A3	A2	A5	A5	A5	A3	A4	A5	A5	A5	A1	A2
1456	2015-02-23 10:05:59	3	fr		2015-02-23 10:05:59	2015-02-23 10:03:47	A1	23	d2	d1	d1		A2		N	0	N	0	3	A4	A2	A4	A4	A2	A3	A3	A4	A4	A3	A4	A4	A3	A4	A4	A3	A1	A4	A3	A3	A2	A1
1458	2015-02-23 12:54:58	3	fr		2015-02-23 12:54:58	2015-02-23 12:52:15	A1	19	d2	d1	d1		A2		N	4	N	0	25	A4	A1	A5	A5	A1	A4	A3	A5	A5	A5	A4	A5	A3	A4	A4	A2	A1	A5	A5	A5	A1	A2
1462	2015-02-23 15:46:32	3	fr		2015-02-23 15:46:32	2015-02-23 15:41:52	A1	23	d1	d1	d1		A2		N	0	N	0	10	A2	A4	A4	A4	A2	A2	A3	A3	A4	A4	A3	A2	A2	A3	A3	A4	A2	A4	A3	A2	A3	A2
1464	2015-02-24 04:16:11	3	fr		2015-02-24 04:16:11	2015-02-24 04:12:15	A1	31	d1	d1	d1		A2		N	0	N	1	4	A5	A2	A3	A4	A3	A3	A4	A4	A4	A2	A4	A2	A2	A4	A4	A3	A2	A3	A3	A4	A2	A2
1466	2015-02-24 06:58:47	3	fr		2015-02-24 06:58:47	2015-02-24 06:51:02	A1	43	d2	d1	d1		A2		N	0	N	0	10	A1	A1	A5	A5	A1	A1	A5	A5	A5	A5	A1	A5	A5	A5	A5	A5	A1	A5	A5	A5	A1	A1
1467	2015-02-24 08:53:54	3	fr		2015-02-24 08:53:54	2015-02-24 08:49:36	A1	23	d1	d1	d1		A2		Y	10	N	1	20	A3	A1	A5	A5	A2	A4	A3	A5	A5	A5	A5	A5	A5	A5	A5	A3	A4	A5	A5	A5	A1	A1
1468	2015-02-24 14:21:30	3	fr		2015-02-24 14:21:30	2015-02-24 14:15:27	A1	23	d2	d1	d1		A2		N	0	N	0	6	A5	A2	A5	A5	A1	A4	A3	A5	A2	A4	A2	A5	A5	A5	A5	A3	A1	A5	A5	A4	A1	A1
1469	2015-02-25 03:45:39	3	fr		2015-02-25 03:45:39	2015-02-25 03:42:12	A1	20	d2	d1	d1		A2		N	0	N	0	25	A5	A1	A4	A5	A1	A4	A4	A5	A3	A4	A3	A4	A2	A5	A4	A5	A2	A4	A4	A4	A2	A2
1470	2015-02-25 04:15:05	3	fr		2015-02-25 04:15:05	2015-02-25 04:11:15	A1	19	d2	d1	d1		A2		Y	10	N	0	35	A5	A1	A5	A5	A2	A5	A4	A5	A5	A5	A5	A5	A2	A5	A5	A5	A2	A5	A5	A5	A1	A1
1471	2015-02-25 06:17:14	3	fr		2015-02-25 06:17:14	2015-02-25 06:13:43	A1	21	d2	d1	d1		A2		N	0	N	0	30	A5	A2	A4	A4	A1	A4	A4	A4	A3	A5	A4	A4	A4	A4	A4	A5	A4	A4	A4	A5	A2	A4
1473	2015-02-25 11:48:04	3	fr		2015-02-25 11:48:04	2015-02-25 11:42:58	A1	22	d2	d1	d1		A2		N	8	N	0	7	A5	A2	A4	A4	A1	A4	A3	A4	A5	A4	A4	A5	A3	A4	A4	A4	A4	A5	A4	A5	A2	A2
1474	2015-02-25 17:42:25	3	fr		2015-02-25 17:42:25	2015-02-25 17:35:00	A1	35	d2	d1	d1		A2		N	0	N	0	7	A3	A2	A3	A4	A1	A4	A3	A4	A4	A5	A3	A3	A4	A4	A5	A3	A2	A3	A4	A5	A2	A3
1475	2015-02-26 03:32:42	3	fr		2015-02-26 03:32:42	2015-02-26 03:28:13	A1	25	d2	d1	d1		A2		N	3	N	0	10	A3	A1	A5	A5	A4	A3	A3	A5	A4	A2	A3	A4	A1	A4	A2	A3	A1	A4	A5	A1	A4	A5
1480	2015-02-27 05:07:57	3	fr		2015-02-27 05:07:57	2015-02-27 05:00:39	A1	18	d2	d1	d1		A2		N	4	N	3	4	A4	A1	A5	A5	A1	A3	A2	A5	A2	A5	A4	A3	A5	A5	A5	A5	A4	A5	A5	A5	A1	A1
1482	2015-02-27 14:19:33	3	fr		2015-02-27 14:19:33	2015-02-27 14:13:32	A1	22	d1	d1	d1		A2		Y	10	N	1	25	A5	A1	A3	A5	A5	A5	A4	A5	A5	A2	A5	A4	A5	A5	A4	A5	A4	A5	A5	A5	A1	A5
1485	2015-02-28 05:58:22	3	fr		2015-02-28 05:58:22	2015-02-28 05:55:08	A1	23	d2	d1	d1		A2		Y	7	N	2	20	A4	A1	A5	A4	A1	A5	A3	A5	A5	A4	A4	A5	A4	A4	A5	A3	A3	A5	A5	A5	A2	A1
1487	2015-03-01 05:28:47	3	fr		2015-03-01 05:28:47	2015-03-01 05:23:43	A1	21	d2	d1	d1		A2		N	0	N	0	5	A5	A2	A4	A5	A4	A4	A3	A5	A4	A2	A3	A2	A2	A5	A4	A3	A2	A4	A5	A4	A2	A2
1488	2015-03-01 06:03:34	3	fr		2015-03-01 06:03:34	2015-03-01 05:56:39	A1	19	d2	d1	d1		A2		N	5	N	0	7	A4	A2	A5	A4	A2	A3	A4	A5	A4	A4	A3	A5	A4	A4	A5	A3	A1	A4	A4	A4	A1	A2
1489	2015-03-01 13:36:29	3	fr		2015-03-01 13:36:29	2015-03-01 13:32:48	A1	21	d2	d1	d1		A2		N	0	N	0	8	A4	A2	A4	A5	A1	A4	A2	A3	A4	A5	A4	A4	A3	A5	A4	A2	A1	A3	A4	A5	A2	A4
1490	2015-03-02 05:33:32	3	fr		2015-03-02 05:33:32	2015-03-02 05:22:17	A1	23	d1	d1	d1		A2		N	3	N	0	14	A4	A2	A5	A4	A5	A4	A3	A5	A4	A2	A2	A3	A3	A4	A4	A4	A1	A1	A2	A2	A2	A4
1493	2015-03-02 16:44:58	3	fr		2015-03-02 16:44:58	2015-03-02 16:17:20	A1	19	d2	d1	d1		A2		Y	3	N	0	8	A4	A2	A5	A5	A2	A3	A4	A5	A5	A5	A2	A4	A1	A5	A5	A5	A3	A4	A5	A5	A1	A2
1494	2015-03-03 05:00:45	3	fr		2015-03-03 05:00:45	2015-03-03 04:53:16	A1	23	d2	d1	d1		A2		Y	4	N	0	10	A3	A5	A5	A5	A1	A4	A5	A5	A5	A5	A5	A5	A4	A5	A5	A4	A4	A5	A5	A4	A2	A1
1495	2015-03-03 06:40:01	3	fr		2015-03-03 06:40:01	2015-03-03 06:35:53	A1	23	d2	d1	d1		A2		N	0	N	0	30	A4	A2	A4	A5	A2	A3	A2	A5	A5	A4	A4	A5	A3	A5	A5	A4	A2	A5	A5	A4	A2	A2
1496	2015-03-04 16:18:37	3	fr		2015-03-04 16:18:37	2015-03-04 16:15:30	A1	44	d2	d1	d1		A4		Y	10	N	7	2	A4	A5	A4	A2	A1	A4	A4	A4	A4	A3	A2	A3	A5	A5	A3	A5	A5	A5	A5	A5	A1	A1
1497	2015-03-05 08:19:31	3	fr		2015-03-05 08:19:31	2015-03-05 08:16:43	A1	21	d1	d1	d1		A2		N	3	N	0	5	A3	A2	A3	A3	A2	A4	A4	A3	A3	A4	A3	A1	A1	A3	A4	A3	A1	A3	A3	A4	A3	A4
1498	2015-03-05 11:08:20	3	fr		2015-03-05 11:08:20	2015-03-05 11:04:55	A1	25	d2	d1	d1		A2		N	0	N	0	12	A4	A1	A5	A5	A1	A3	A4	A5	A5	A4	A4	A5	A2	A4	A5	A5	A1	A5	A5	A5	A2	A3
1499	2015-03-05 15:21:23	3	fr		2015-03-05 15:21:23	2015-03-05 15:17:08	A1	18	d2	d1	d1			Tunisie	N	0	N	6	30	A4	A2	A5	A5	A2	A3	A2	A5	A4	A2	A3	A4	A1	A4	A5	A4	A1	A4	A4	A5	A2	A3
1502	2015-03-06 13:14:16	3	fr		2015-03-06 13:14:16	2015-03-06 13:09:27	A1	21	d2	d1	d1			Sénégal	N	0	N	0	16	A3	A1	A5	A5	A1	A3	A2	A5	A5	A4	A4	A5	A4	A5	A4	A3	A1	A4	A4	A4	A4	A1
1505	2015-03-08 19:32:29	3	fr		2015-03-08 19:32:29	2015-03-08 19:28:14	A1	23	d2	d1	d1		A2		Y	9	N	5	5	A4	A3	A5	A5	A3	A3	A3	A5	A4	A3	A3	A5	A5	A5	A5	A5	A2	A5	A4	A4	A2	A1
1506	2015-03-10 08:32:10	3	fr		2015-03-10 08:32:10	2015-03-10 08:28:26	A1	24	d2	d1	d1		A2		Y	15	N	3	10	A3	A2	A4	A3	A4	A4	A4	A5	A4	A3	A3	A3	A5	A5	A4	A3	A3	A4	A4	A4	A1	A1
1507	2015-03-10 08:36:07	3	fr		2015-03-10 08:36:07	2015-03-10 08:30:55	A1	29	d2	d1	d1		A2		N	5	N	0	10	A5	A1	A4	A4	A1	A5	A5	A5	A4	A5	A3	A5	A2	A5	A3	A4	A2	A5	A5	A5	A2	A2
1508	2015-03-10 11:44:14	3	fr		2015-03-10 11:44:14	2015-03-10 11:40:46	A1	28	d2	d1	d1		A2		N	0	N	0	15	A4	A1	A4	A4	A2	A4	A4	A5	A5	A3	A4	A4	A3	A4	A4	A4	A2	A4	A5	A4	A2	A2
1509	2015-03-10 12:11:16	3	fr		2015-03-10 12:11:16	2015-03-10 12:02:20	A1	29	d1	d1	d1		A2		N	0	N	0	5	A4	A4	A5	A4	A4	A2	A4	A5	A3	A2	A2	A2	A1	A2	A2	A3	A2	A5	A4	A5	A1	A1
1510	2015-03-10 12:23:23	3	fr		2015-03-10 12:23:23	2015-03-10 12:09:48	A1	18	d2	d3	d1		A2		Y	8	N	14	49	A4	A1	A5	A5	A1	A5	A5	A5	A5	A5	A5	A5	A5	A5	A5	A4	A3	A5	A5	A5	A1	A1
1511	2015-03-10 12:26:02	3	fr		2015-03-10 12:26:02	2015-03-10 12:22:53	A1	25	d2	d1	d1		A2		Y	5	N	0	3	A4	A4	A4	A5	A1	A2	A2	A4	A3	A5	A2	A2	A4	A2	A2	A1	A2	A2	A4	A5	A3	A4
1513	2015-03-10 14:22:25	3	fr		2015-03-10 14:22:25	2015-03-10 14:16:51	A1	27	d2	d3	d1		A2		N	2	N	2	1	A4	A4	A3	A4	A2	A3	A4	A5	A4	A3	A2	A3	A4	A4	A4	A3	A2	A2	A4	A3	A2	A1
1514	2015-03-11 06:50:51	3	fr		2015-03-11 06:50:51	2015-03-11 06:47:25	A1	24	d2	d1	d1		A2		Y	8	N	0	3	A4	A5	A4	A4	A5	A4	A4	A4	A5	A1	A1	A4	A4	A5	A4	A3	A1	A2	A4	A4	A3	A4
1515	2015-03-12 09:05:49	3	fr		2015-03-12 09:05:49	2015-03-12 09:02:49	A1	29	d1	d1	d1		A2		N	0	N	0	40	A4	A1	A4	A3	A5	A3	A4	A5	A4	A1	A4	A3	A1	A4	A4	A4	A2	A4	A4	A3	A1	A2
1516	2015-03-12 17:57:11	3	fr		2015-03-12 17:57:11	2015-03-12 17:51:49	A1	54	d1	d1	d1		A2		N	0	N	0	5	A4	A1	A5	A3	A5	A4	A5	A5	A5	A1	A3	A5	A1	A1	A3	A4	A3	A5	A5	A3	A3	A1
1517	2015-03-13 10:56:16	3	fr		2015-03-13 10:56:16	2015-03-13 10:42:35	A1	24	d2	d1	d1		A2		Y	10	Y	4	10	A5	A2	A3	A4	A1	A4	A5	A4	A4	A2	A5	A2	A5	A4	A4	A3	A3	A4	A4	A4	A2	A1
1518	2015-03-14 17:14:49	3	fr		2015-03-14 17:14:49	2015-03-14 17:09:15	A1	24	d2	d1	d6			Algérie	N	0	N	0	2	A3	A2	A5	A5	A3	A3	A5	A4	A4	A4	A3	A4	A1	A4	A4	A4	A3	A4	A4	A5	A2	A3
1521	2015-03-17 06:20:56	3	fr		2015-03-17 06:20:56	2015-03-17 06:18:44	A1	22	d1	d1	d1		A2		Y	10	N	4	40	A5	A1	A5	A5	A5	A5	A5	A5	A5	A1	A5	A5	A5	A5	A5	A4	A5	A5	A5	A4	A1	A1
1524	2015-03-18 07:42:11	3	fr		2015-03-18 07:42:11	2015-03-18 07:39:04	A1	24	d2	d1	d1		A2		N	0	N	0	3	A3	A2	A5	A4	A2	A3	A3	A4	A4	A3	A3	A1	A1	A4	A4	A3	A1	A1	A3	A3	A1	A4
1525	2015-03-19 10:21:33	3	fr		2015-03-19 10:21:33	2015-03-19 10:14:17	A1	20	d2	d1	d1		A2		N	0	N	0	60	A5	A2	A3	A4	A1	A4	A3	A5	A5	A5	A4	A5	A5	A5	A5	A3	A1	A5	A5	A5	A1	A1
1526	2015-03-19 21:22:23	3	fr		2015-03-19 21:22:23	2015-03-19 21:18:32	A1	21	d1	d1	d1		A2		Y	7	N	1	4	A5	A2	A5	A5	A1	A5	A5	A5	A5	A5	A5	A2	A5	A5	A4	A5	A5	A5	A5	A5	A1	A1
1529	2015-03-23 10:31:36	3	fr		2015-03-23 10:31:36	2015-03-23 10:28:34	A1	23	d2	d1	d2		A6		N	0	N	0	1	A5	A1	A4	A5	A2	A4	A3	A5	A5	A4	A5	A2	A4	A5	A5	A5	A2	A5	A5	A5	A1	A2
1530	2015-03-27 12:59:24	3	fr		2015-03-27 12:59:24	2015-03-27 12:55:36	A1	31	d1	d1	d1		A2		N	2	N	0	70	A4	A1	A3	A5	A4	A4	A5	A4	A3	A2	A5	A2	A2	A4	A3	A3	A4	A2	A3	A4	A1	A1
1531	2015-03-29 14:21:19	3	fr		2015-03-29 14:21:19	2015-03-29 14:17:08	A1	21	d2	d1	d1		A2		N	2	N	1	3	A4	A1	A5	A5	A3	A4	A4	A4	A4	A3	A3	A3	A4	A5	A5	A3	A3	A4	A4	A5	A1	A2
